# Supplementary material for: One-pot three-component regioselective synthesis of C1-functionalised 3-arylbenzo[f]quinoline
Source: Royal Society of Chemistry journal article supplement (doi:10.1039/c5ra23413a), 2016-01-01

## Supporting Information

### One-pot three component regioselective synthesis of C1-functionalised 3-arylbenzo[*f*]quinoline

Radhakrishna Gattu, R. Sidick Basha, Prasanta Ray Bagdi and Abu T. Khan\*<sup>a,b</sup>

<sup>a</sup>*Department of Chemistry, Indian Institute of Technology Guwahati, Guwahati 781 039, India  
Tel.: +91 361 2582305; Fax: +91 361 2582349*

<sup>b</sup>*Present address: Vice-Chancellor, Aliah University, IIA/27, New Town, Kolkata-700 156, West Bengal, India.*

*Email: atk@iitg.ernet.in (A. T. Khan)*

|                                                                                              |             |
|----------------------------------------------------------------------------------------------|-------------|
| <i>Title page</i>                                                                            | <b>1</b>    |
| <i>Crystal Data and Structure Refinement for Compound 4g</i>                                 | <b>2</b>    |
| <i>Copies of <sup>1</sup>H NMR, <sup>13</sup>C NMR and HRMS spectra of all the Compounds</i> | <b>3-81</b> |

**Table 3.** Crystal Data and Structure Refinement for Compound **4g**

| Entry | Identification code   | Compound <b>4g</b>                                                     |
|-------|-----------------------|------------------------------------------------------------------------|
| 01    | Empirical formula     | C <sub>25</sub> H <sub>22</sub> F N O <sub>2</sub>                     |
| 02    | Formula weight        | 387.44                                                                 |
| 03    | Temperature           | 293(2) K                                                               |
| 04    | Wavelength            | 0.71073                                                                |
| 05    | Radiation type        | Mo K $\alpha$                                                          |
| 06    | Radiation source      | 'fine-focus sealed tube'                                               |
| 07    | Crystal system        | monoclinic                                                             |
| 08    | Space group           | C2/c                                                                   |
| 09    | Cell length           | a 28.746 (3) b 10.589 (9) c 16.238 (15)                                |
| 10    | Cell Angle            | $\alpha$ 90.0 $\beta$ 123.742 (6) $\delta$ 90.0                        |
| 11    | Cell Volume           | 4110.3 (7)                                                             |
| 12    | Density               | 1.252                                                                  |
| 13    | Absorption correction | multi-scan                                                             |
| 14    | Refinement method     | Full-matrix least-squares on F <sup>2</sup>                            |
| 15    | Index ranges          | -33 $\leq$ h $\leq$ 30, -10 $\leq$ k $\leq$ 11, -16 $\leq$ l $\leq$ 17 |
| 16    | Reflection number     | 12686                                                                  |
| 17    | Theta range           | 1.70-24.24                                                             |
| 18    | Cell formula units Z  | 8                                                                      |
| 19    | CCDC no               | 1434638                                                                |



<sup>13</sup>C NMR spectra of compound 4a

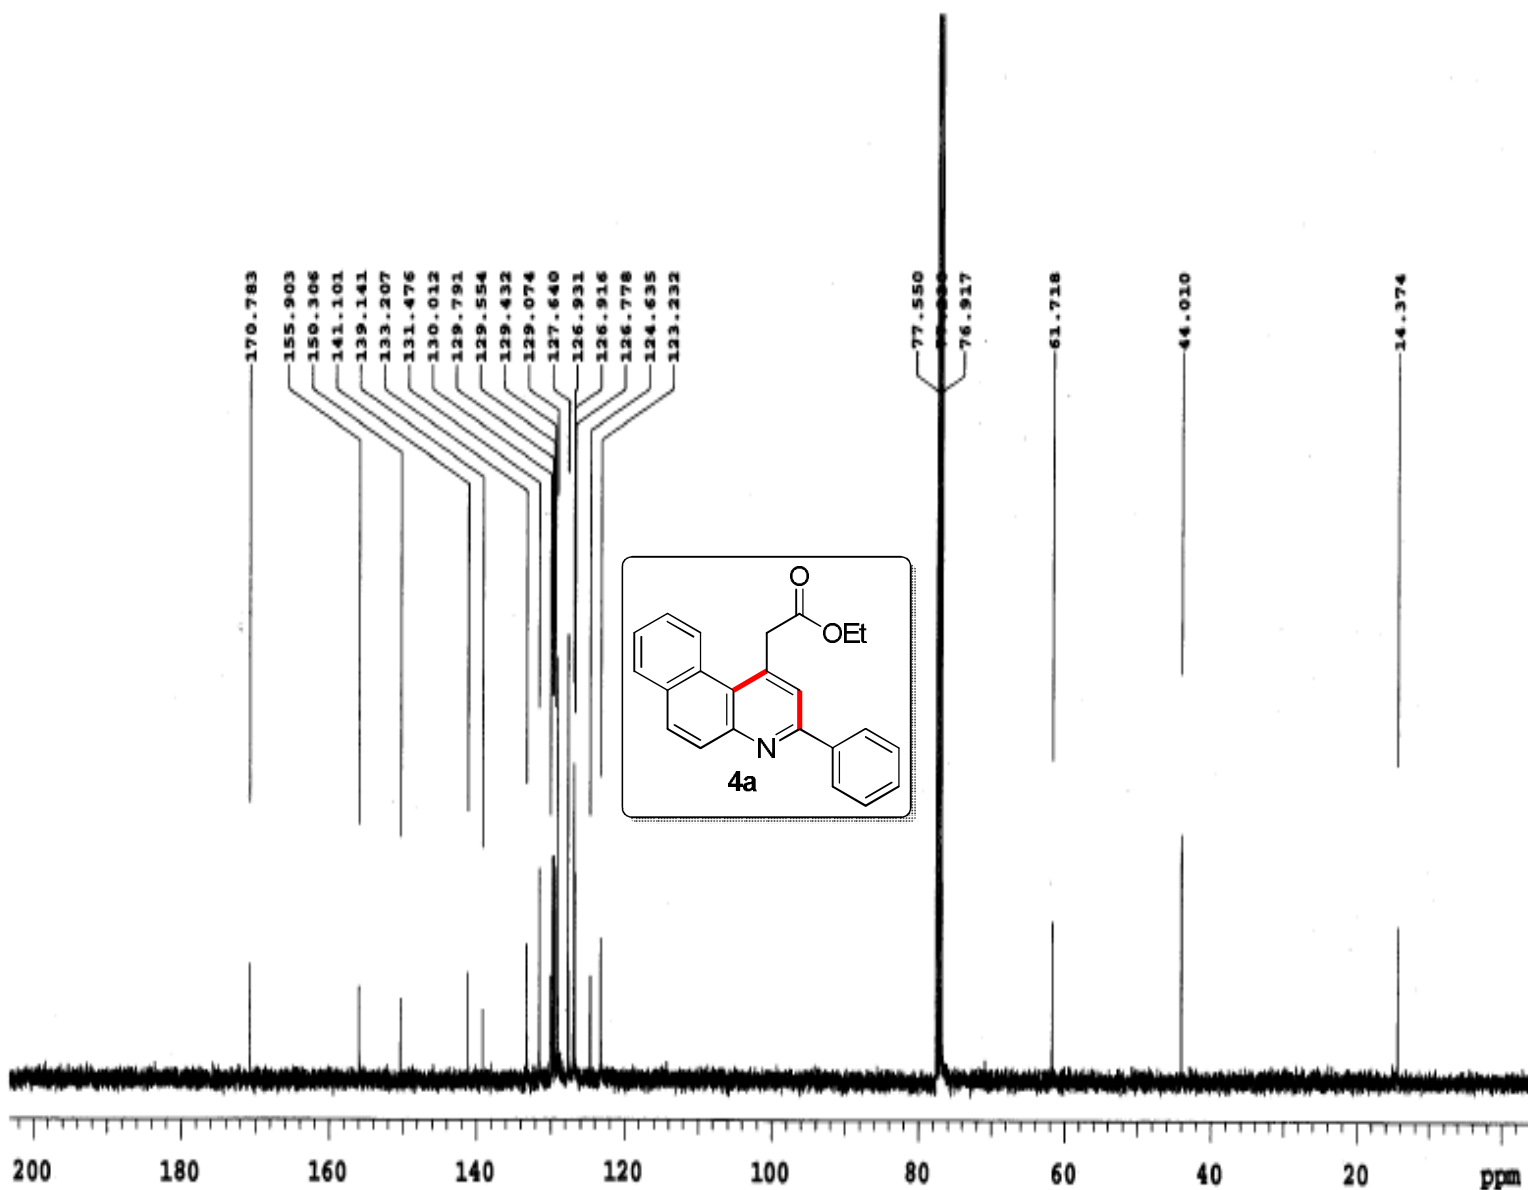

PULSE SEQUENCE

Relax. delay 1.000 sec  
Pulse 45.0 degrees  
Acq. time 1.304 sec  
Width 25125.6 Hz  
2920 repetitions

OBSERVE C13, 100.5425817

DECOUPLE H1, 399.8529994  
Power 42 dB  
continuously on  
WALTZ-16 modulated

DATA PROCESSING

Line broadening 0.5 Hz  
FT size 65536  
Total time 112 minutes

RK-BEMZ-OET-13C

Solvent: cdcl3  
Temp. 25.0 C / 298.1 K  
Operator: chem  
File: RK-BEMZ-OET-13C  
Mercury-400 \*IITG-NMR\*

*HRMS spectra of compound 4a*

| Sample Name   | Position    | Instrument Name | User Name              |
|---------------|-------------|-----------------|------------------------|
| Inj Vol       | InjPosition | SampleType      | IRM Calibration Status |
| Data Filename | ACQ Method  | Comment         | Acquired Time          |

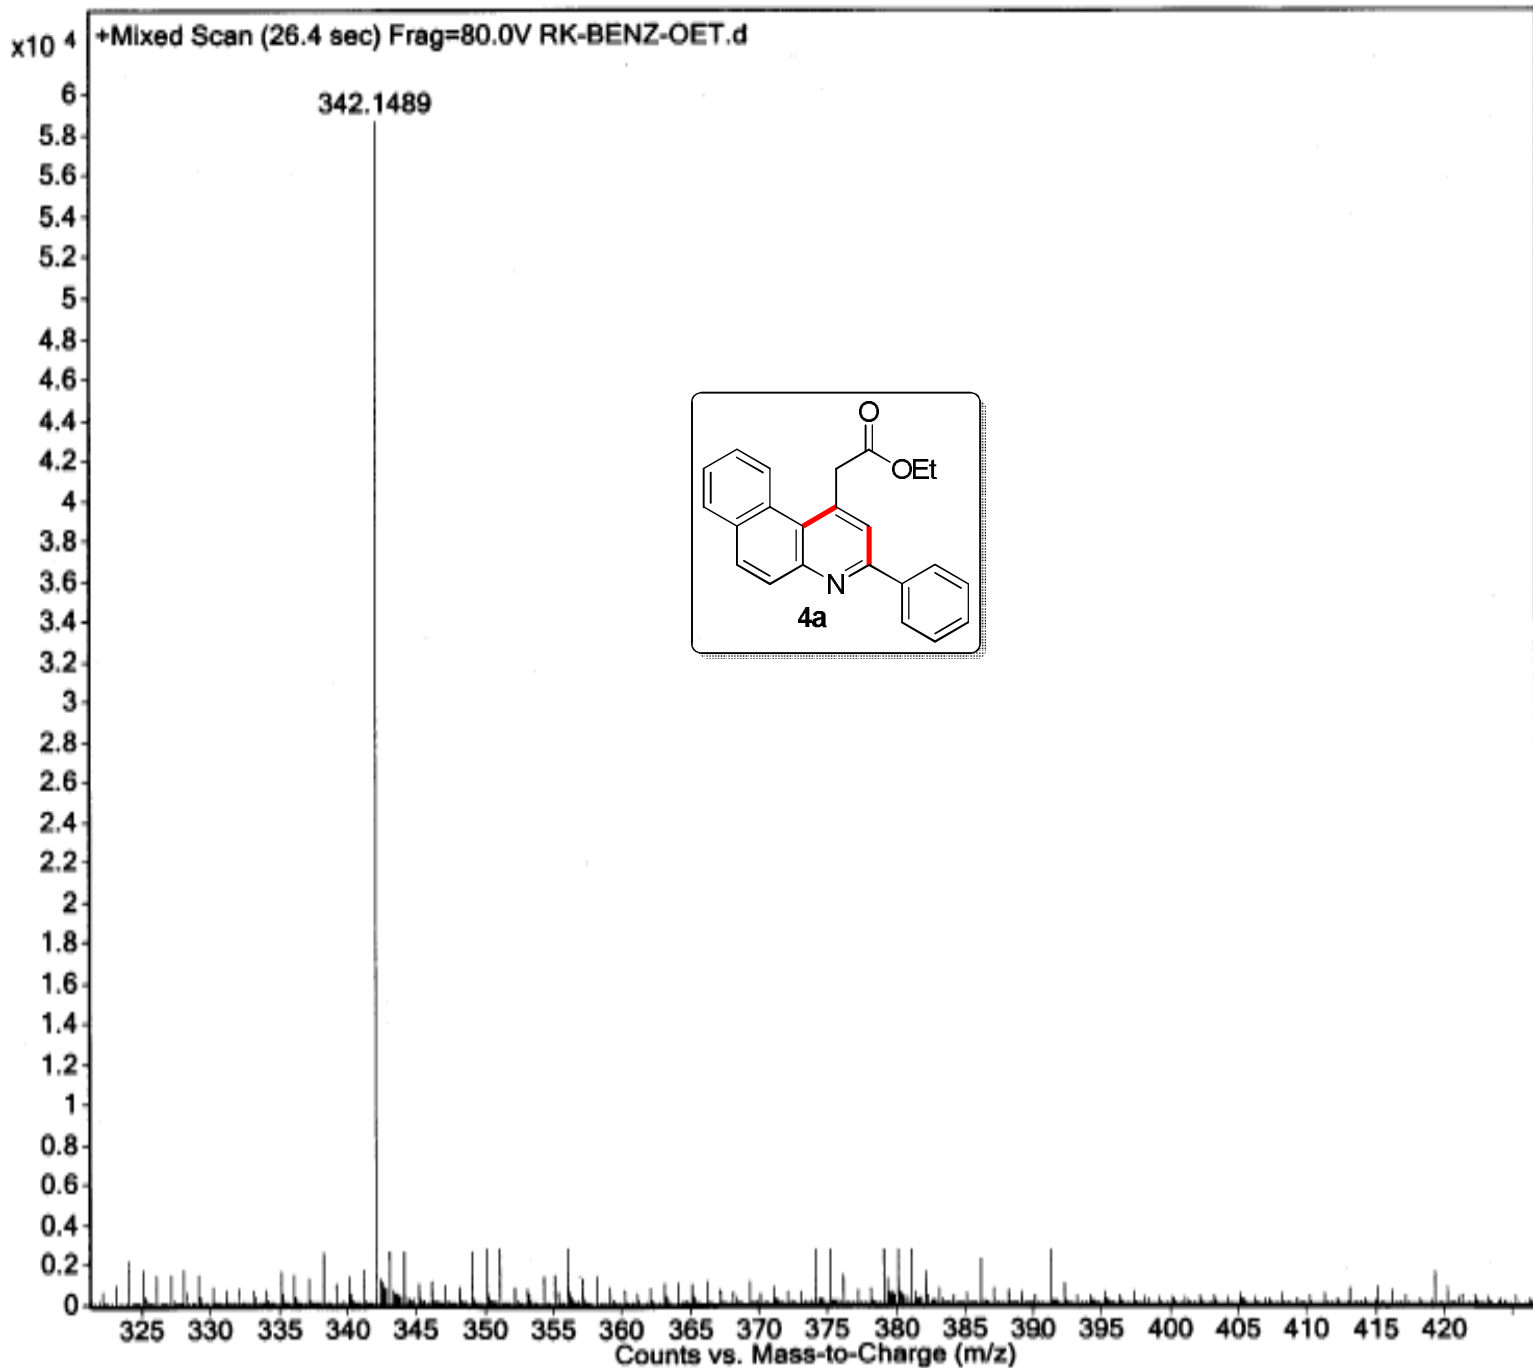



*<sup>13</sup>C NMR spectra of compound 4b*

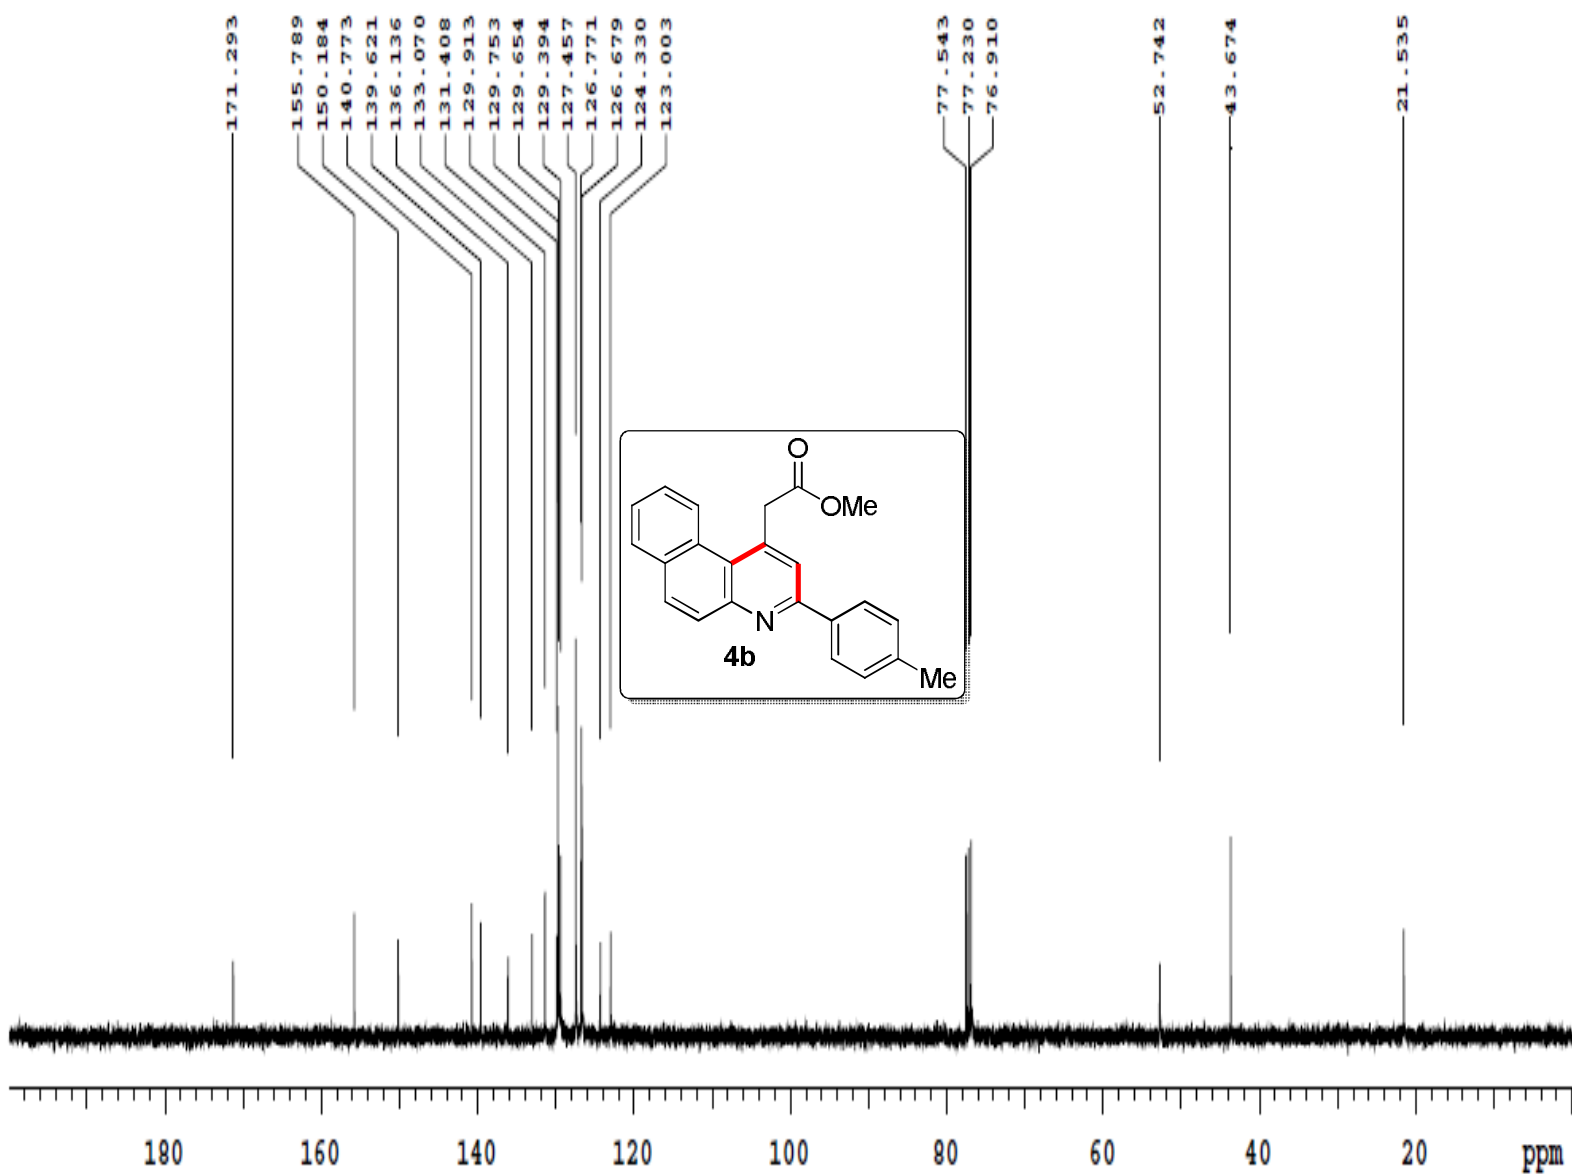

|                                                                                                                                    |                                                                                                                            |                                                                                           |                                                                                                                                           |
|------------------------------------------------------------------------------------------------------------------------------------|----------------------------------------------------------------------------------------------------------------------------|-------------------------------------------------------------------------------------------|-------------------------------------------------------------------------------------------------------------------------------------------|
| <b>PULSE SEQUENCE</b><br>Relax. delay 1.000 sec<br>Pulse 45.0 degrees<br>Acq. time 1.304 sec<br>Width 25125.6 Hz<br>90 repetitions | <b>OBSERVE</b> c13, 100.5425086<br><b>DECOUPLE</b> H1, 399.0529994<br>Power 42 dB<br>continuously on<br>WALTZ-16 modulated | <b>DATA PROCESSING</b><br>Line broadening 0.5 Hz<br>FT size 65536<br>Total time 3 minutes | <b>RK-ME-OME-1B-13C</b><br>Solvent: cdcl3<br>Temp. 25.0 c / 290.1 K<br>Operator: chem<br>File: RK-ME-OME-1B-13C<br>Mercury-400 "IITG-NMR" |
|------------------------------------------------------------------------------------------------------------------------------------|----------------------------------------------------------------------------------------------------------------------------|-------------------------------------------------------------------------------------------|-------------------------------------------------------------------------------------------------------------------------------------------|

HRMS spectra of compound 4b

| Sample Name   | Position    | Instrument Name | User Name              |
|---------------|-------------|-----------------|------------------------|
| Inj Vol       | InjPosition | SampleType      | IRM Calibration Status |
| Data Filename | ACQ Method  | Comment         | Acquired Time          |

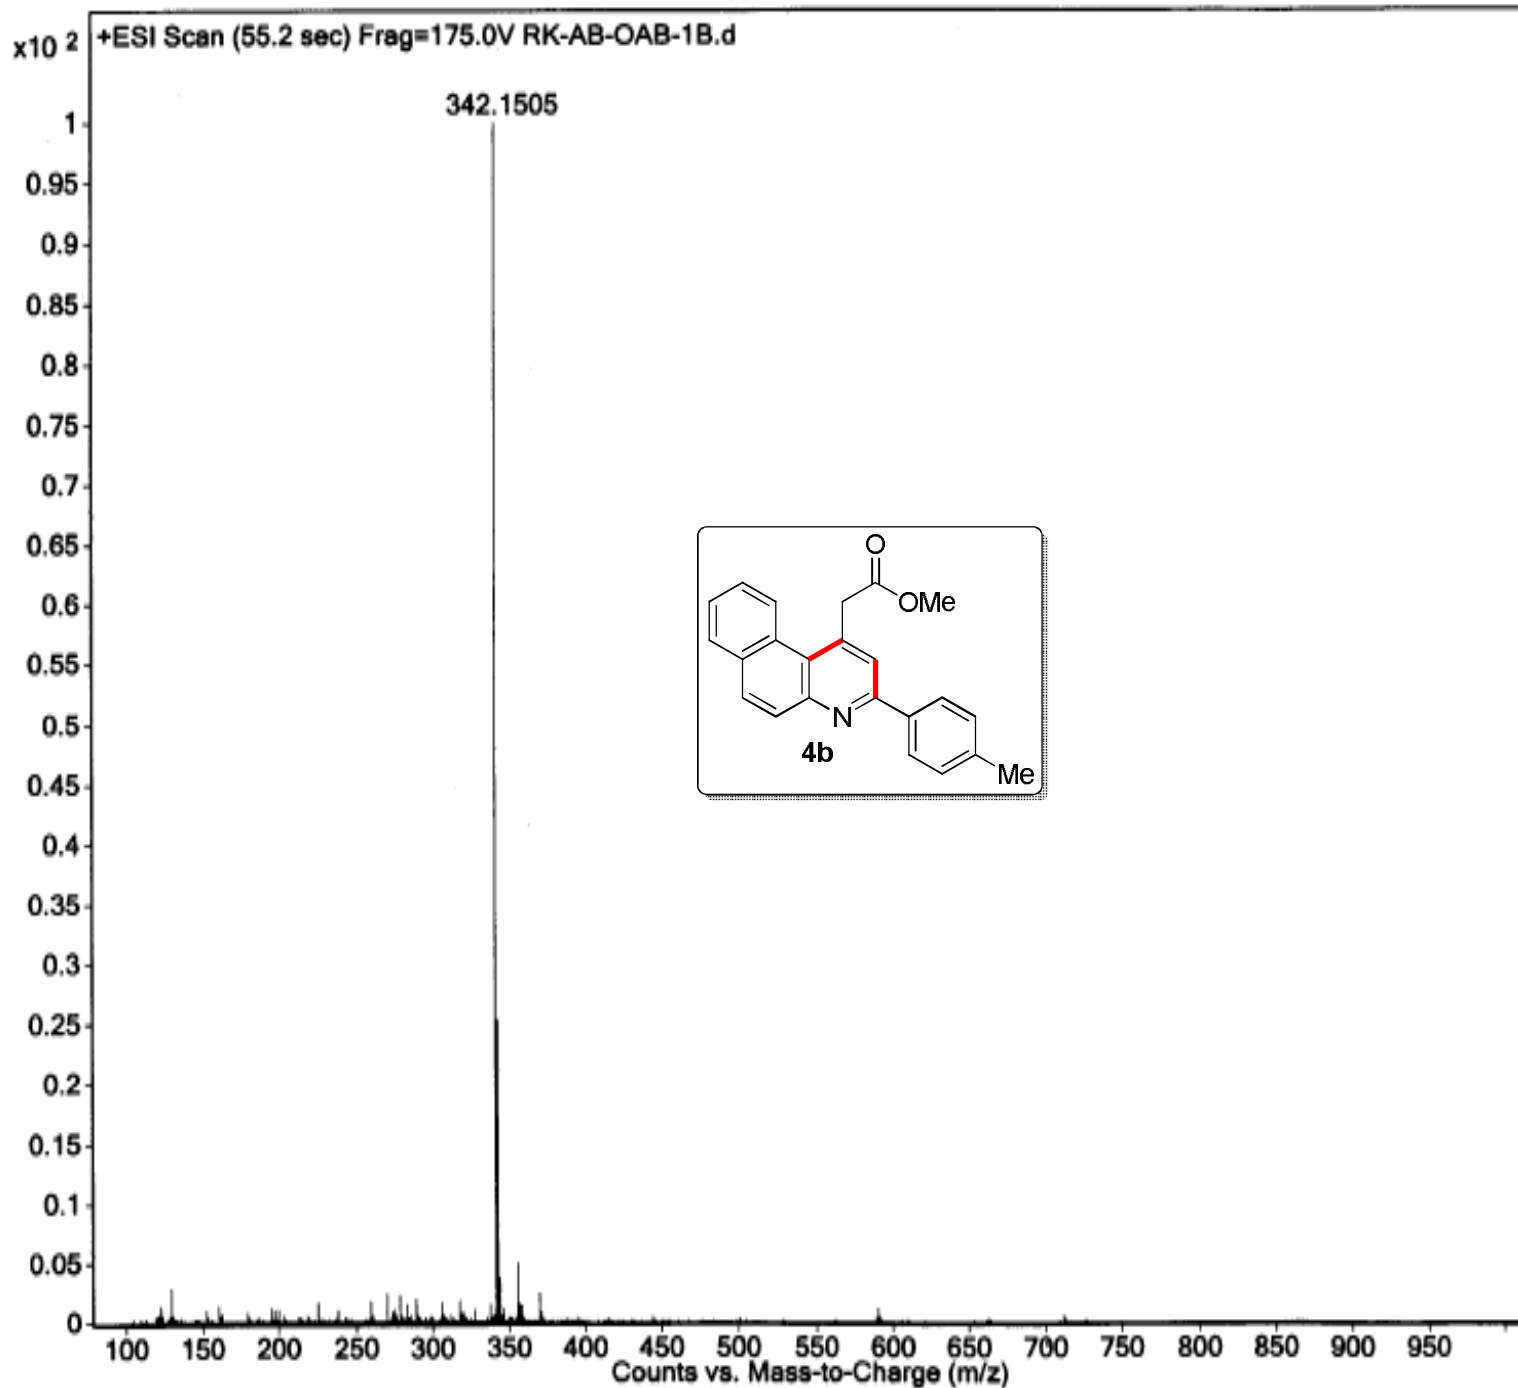



# <sup>1</sup>H NMR spectra of compound 4c

Data Collected on:  
IITG-NMR-mercury400  
Archive directory:  
/export/home/chempack/vnmrsys/data  
Sample directory:

FidFile: RK-THF-1a-1H

Pulse Sequence: PROTON (s2pul)  
Solvent: cdcl3  
Data collected on: May 3 2014

Temp. 25.0 C / 298.1 K  
Operator: chem

Relax. delay 1.000 sec  
Pulse 45.0 degrees  
Acq. time 2.561 sec  
Width 6398.0 Hz  
32 repetitions  
OBSERVE H1, 399.8509606 MHz  
DATA PROCESSING  
FT size 32768  
Total time 2 min 12 sec

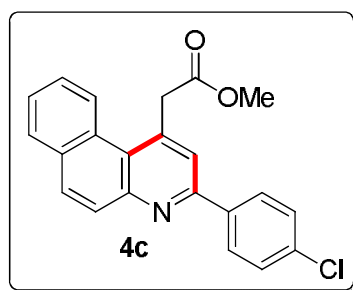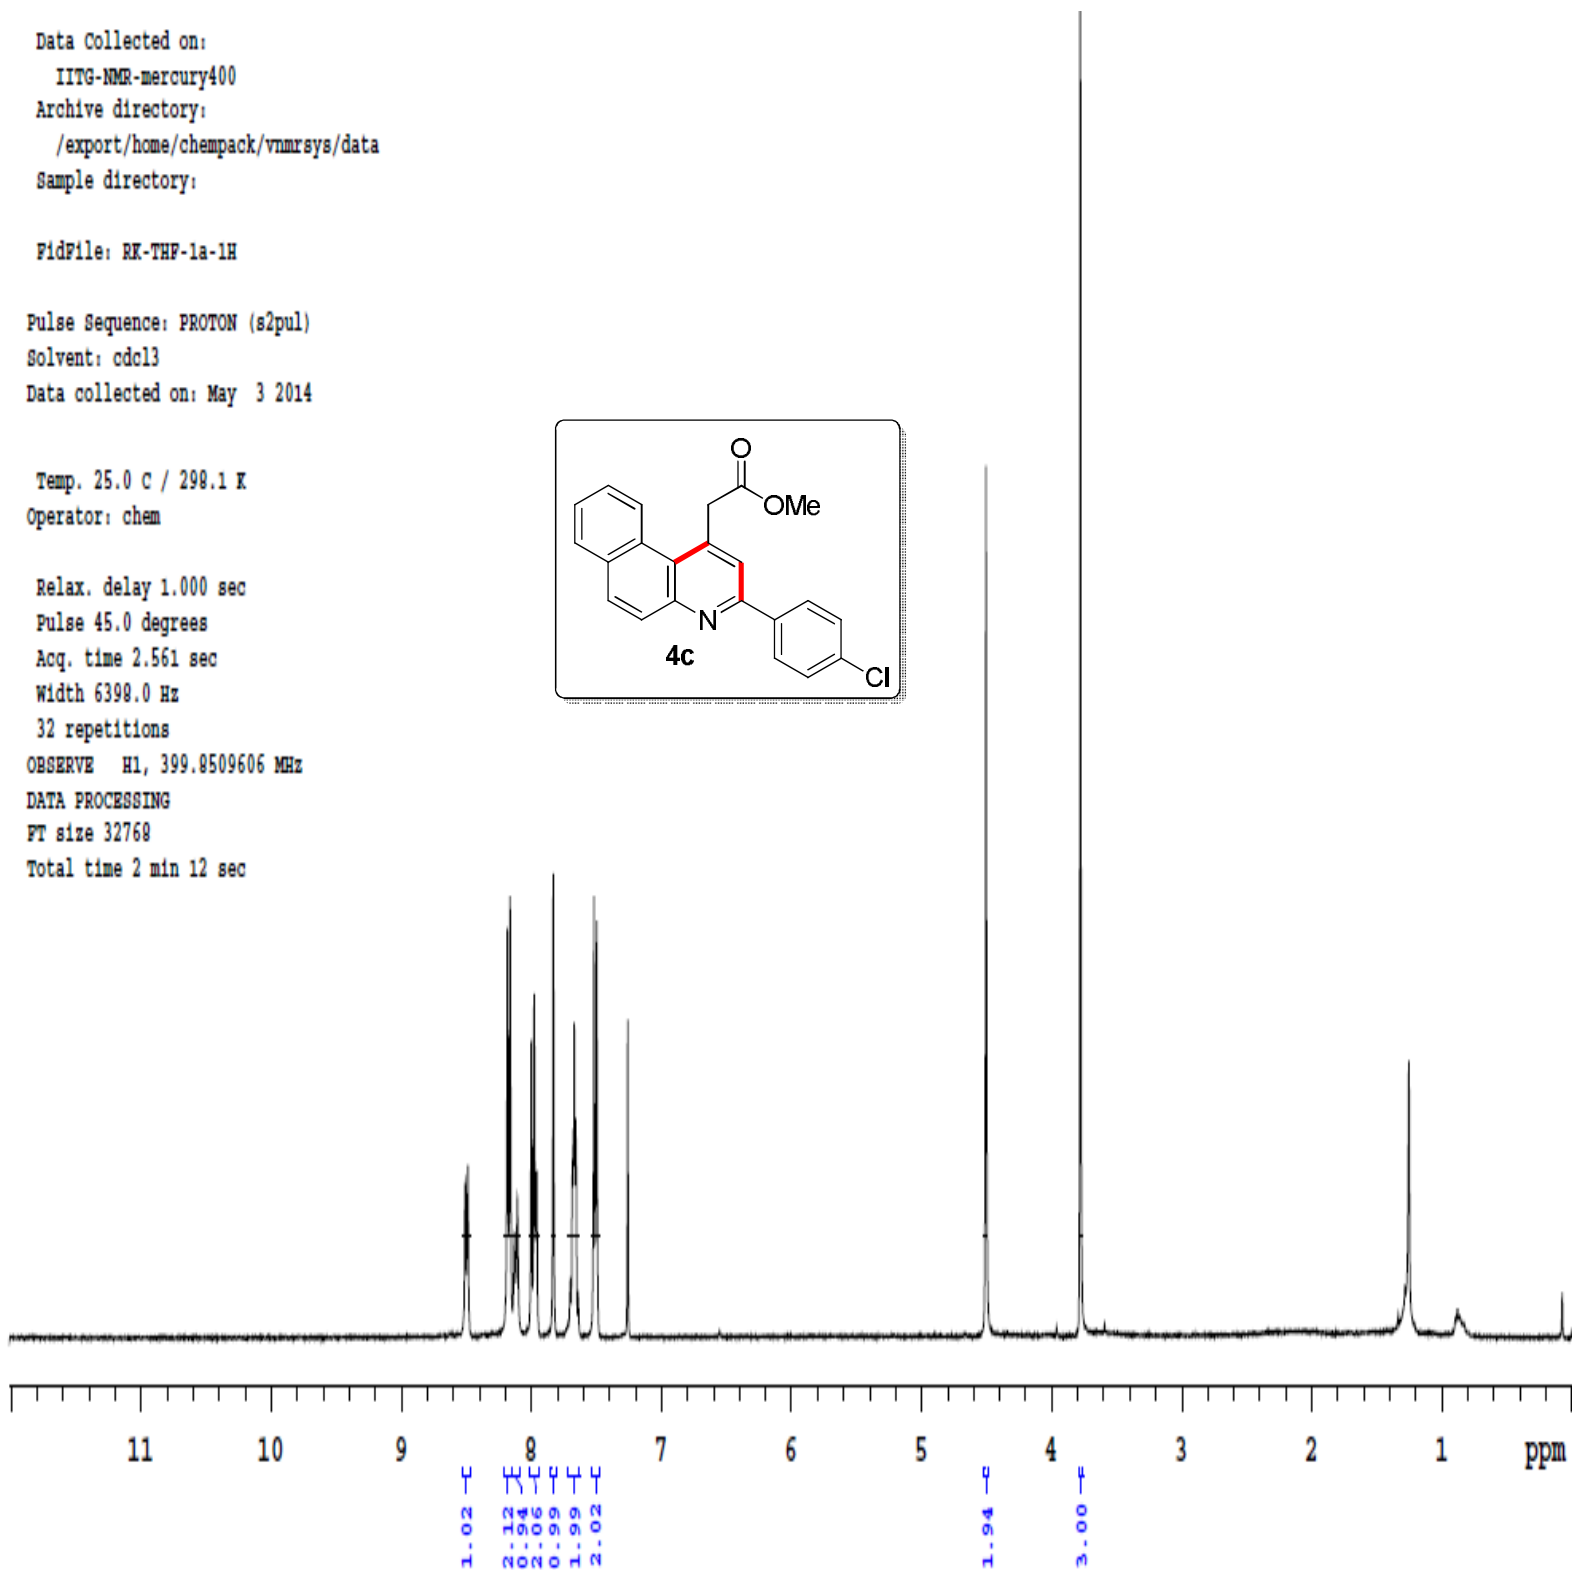

*<sup>13</sup>C NMR spectra of compound 4c*

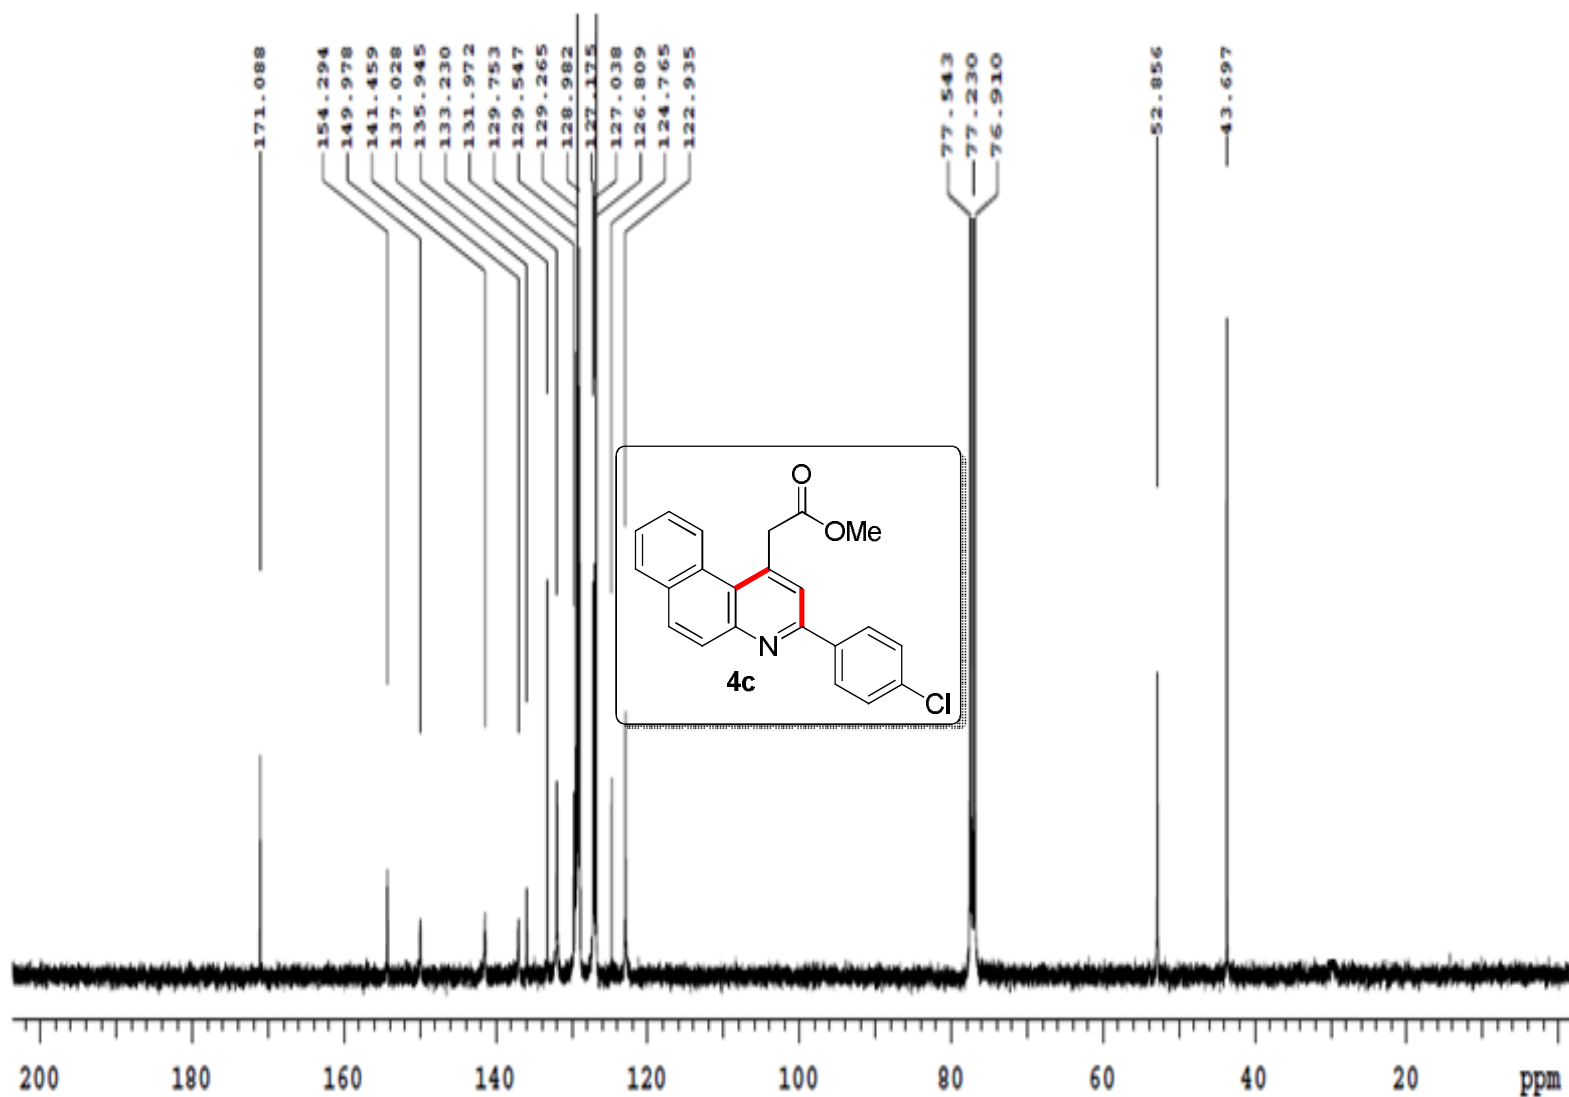

PULSE SEQUENCE  
Relax. delay 1.000 sec  
Pulse 45.0 degrees  
Acq. time 1.304 sec  
Width 25125.6 Hz  
15000 repetitions

OBSERVE C13, 100.5425824  
DECOUPLE W1, 399.8529994  
Power 42 dB  
continuously on  
WALTZ-16 modulated

DATA PROCESSING  
Line broadening 0.5 Hz  
FT size 65536  
Total time 9.6 hours

Solvent: cdcl3  
Temp. 25.0 C / 298.1 K  
Operator: chem  
File:  
Mercury-400 \*IITG-NMR\*

HRMS spectra of compound 4c

|               |              |             |    |                 |              |                        |                        |
|---------------|--------------|-------------|----|-----------------|--------------|------------------------|------------------------|
| Sample Name   | RK-4Cl-OMe   | Position    | -1 | Instrument Name | Instrument 1 | User Name              |                        |
| Inj Vol       | -10          | InjPosition |    | SampleType      | Sample       | IRM Calibration Status | Success                |
| Data Filename | RK-4Cl-OMe.d | ACQ Method  |    | Comment         |              | Acquired Time          | 11/11/2014 11:54:46 AM |

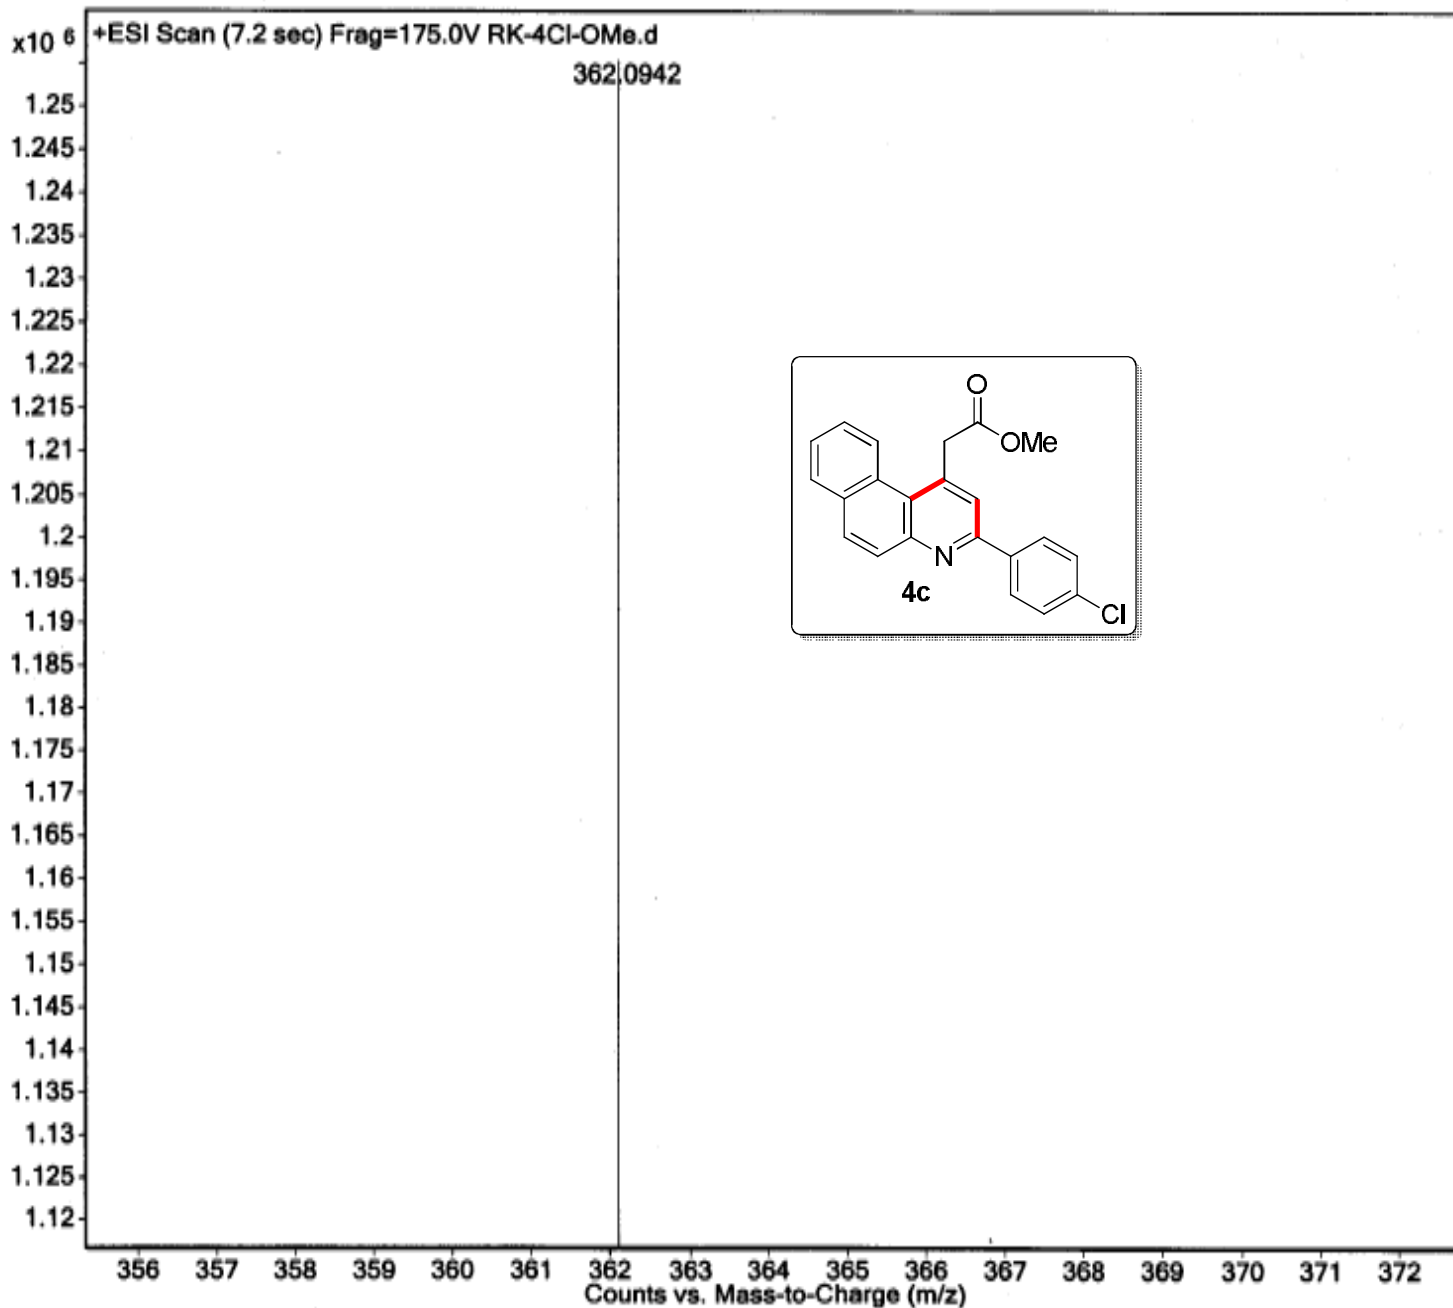

*<sup>1</sup>H NMR spectra of compound 4d*

RK\_4Br\_ome\_1H

expl PROTON

| SAMPLE              |                | PRESATURATION |          |
|---------------------|----------------|---------------|----------|
| date                | Sep 19 2014    | satmode       | n        |
| solvent             | cdcl3          | wet           | n        |
| file                | /home/chem/da- | SPECIAL       |          |
| ta/ATK/Radha/RK_4B- | r_ome_1H.fid   | temp          | 25.0     |
|                     |                | gain          | 30       |
| ACQUISITION         |                | spin          | not used |
| sw                  | 6398.0         | hst           | 0.008    |
| at                  | 2.561          | pw90          | 16.300   |
| np                  | 32768          | alfa          | 10.000   |
| fb                  | 3600           | FLAGS         |          |
| bs                  | 4              | il            | n        |
| di                  | 1.000          | in            | n        |
| nt                  | 32             | dp            | y        |
| ct                  | 32             | hs            | nn       |
| TRANSMITTER         |                | PROCESSING    |          |
| tn                  | H1             | fn            | not used |
| sfrq                | 399.853        | DISPLAY       |          |
| tof                 | 363.1          | sp            | -64.2    |
| tpwr                | 58             | wp            | 4613.0   |
| pw                  | 8.150          | rfl           | 799.9    |
| DECOUPLER           |                | rfp           | 0        |
| dn                  | C13            | rp            | 130.4    |
| dof                 | 0              | lp            | -101.8   |
| dm                  | nnn            | PLOT          |          |
| decwave             | g              | wc            | 268      |
| dpwr                | 40             | sc            | 0        |
| dmf                 | 17100          | vs            | 290      |
|                     |                | th            | 45       |
|                     |                | ai            | cdc ph   |

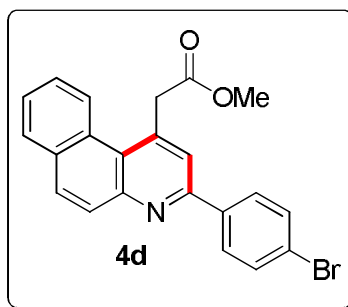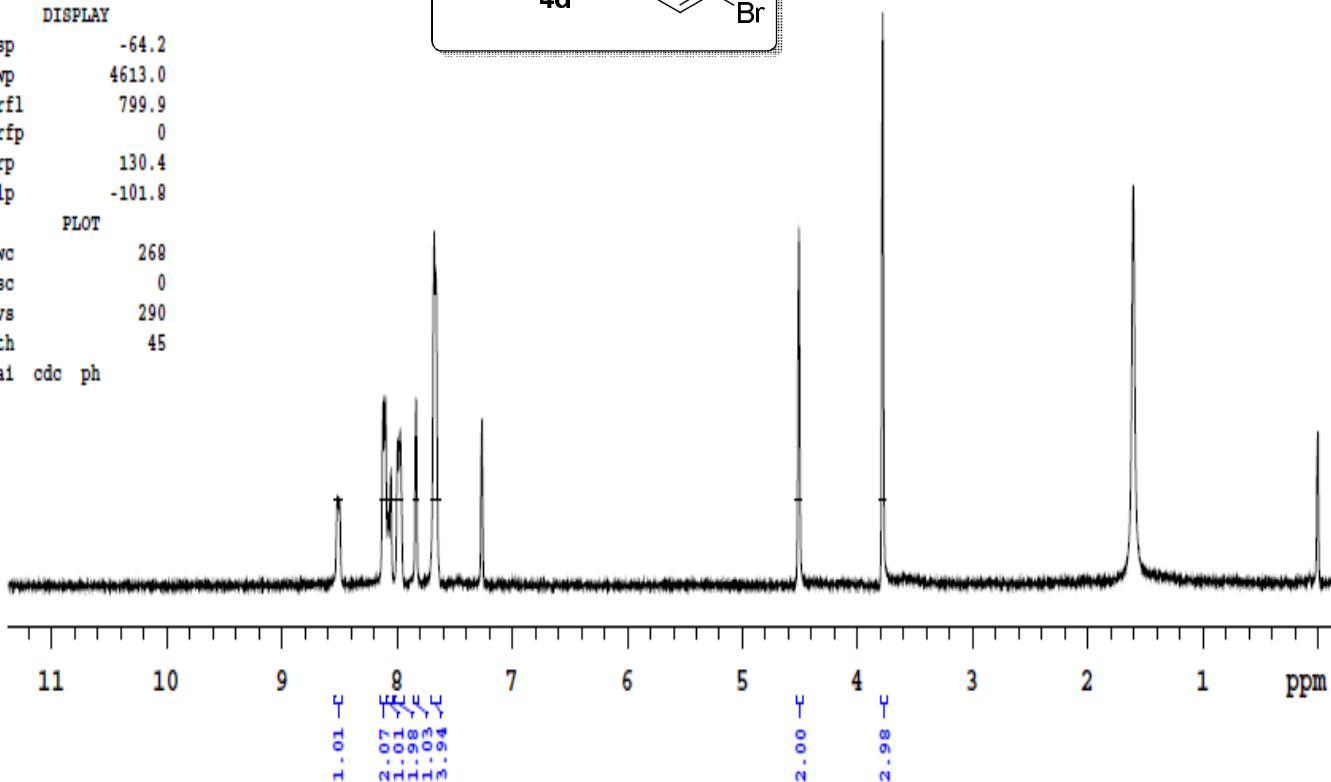

*<sup>13</sup>C NMR spectra of compound 4d*

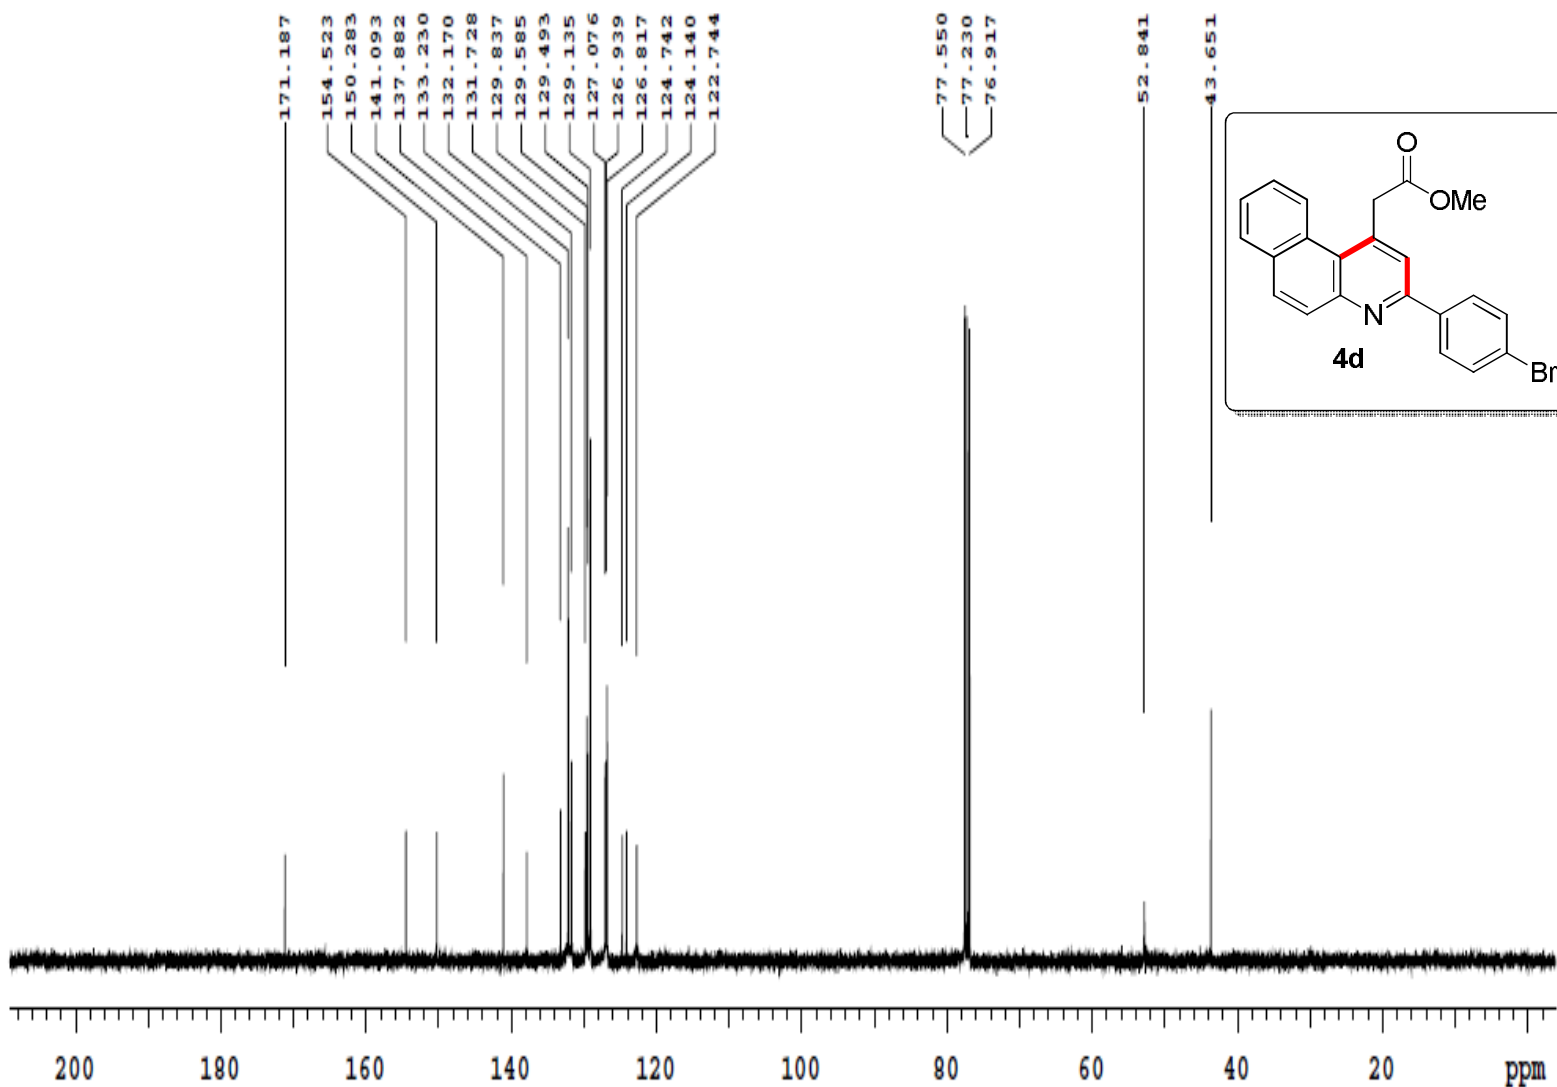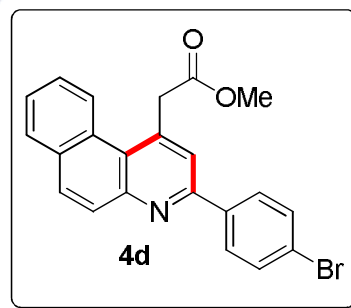

PULSE SEQUENCE  
Relax. delay 1.000 sec  
Pulse 45.0 degrees  
Acq. time 1.304 sec  
Width 25125.6 Hz  
1000 repetitions

OBSERVE C13, 100.5425040  
DECOUPLE H1, 399.0529994  
Power 42 dB  
continuously on  
WALTZ-16 modulated

DATA PROCESSING  
Line broadening 0.5 Hz  
FT size 65536  
Total time 30 minutes

UGRD-93-03-13C  
Solvent: cdcl3  
Temp. 25.0 C / 298.1 K  
Operator: chem  
File: Rk-4Br-OMe-13C  
Mercury-400 "IITG-NMR"

HRMS spectra of compound 4d

| Sample Name   | Position    | Instrument Name | User Name              |
|---------------|-------------|-----------------|------------------------|
| Inj Vol       | InjPosition | SampleType      | IRM Calibration Status |
| Data Filename | ACQ Method  | Comment         | Acquired Time          |

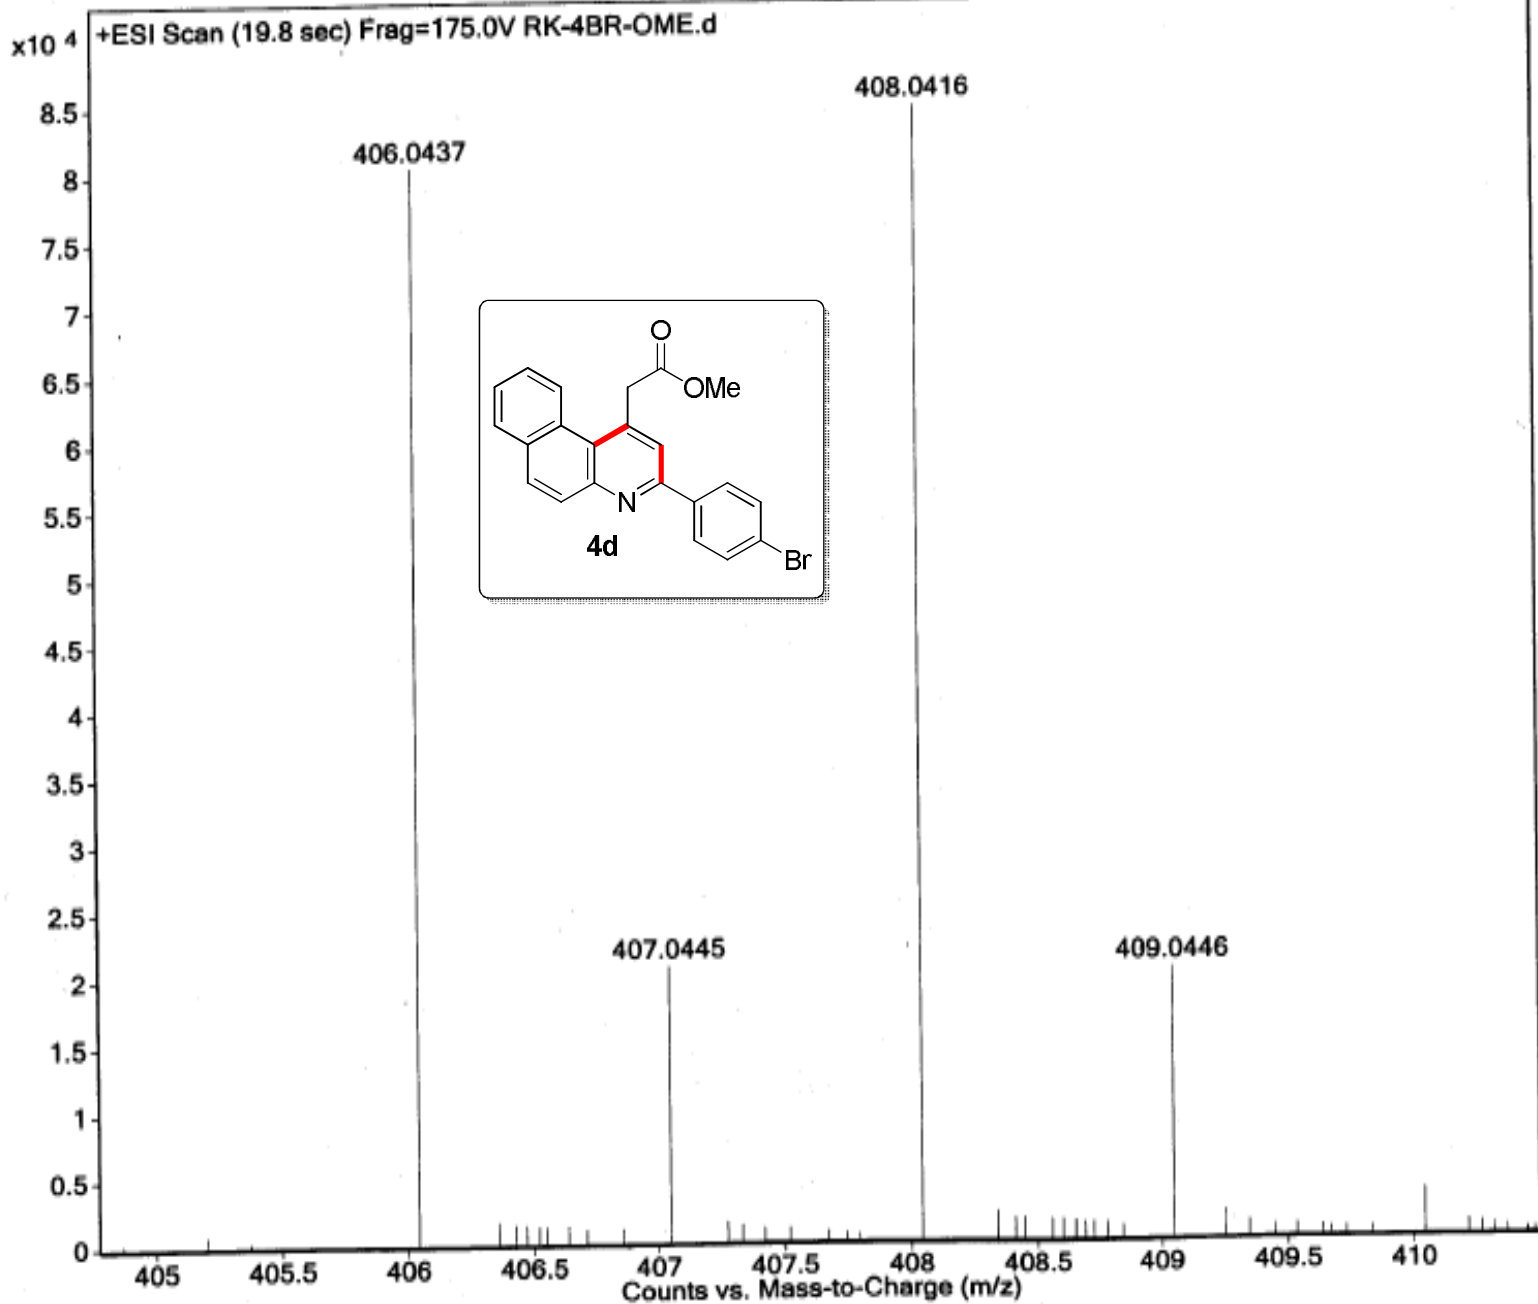

*<sup>1</sup>H NMR spectra of compound 4e*

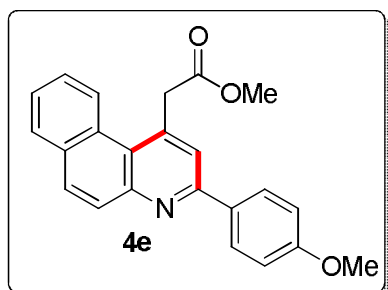

Current Data Parameters  
NAME BK-OMe-OMe-1H  
EXPNO 1  
PROCNO 1

F2 = Acquisition Parameters  
Date\_ 20141208  
Time 15.05  
INSTRUM spect  
PROBHD 5 mm EBBQ BB/  
PULPROG zg30  
TD 32768  
SOLVENT CDCl3  
NS 16  
DS 2  
SWH 12019.230 Hz  
FIDRES 0.366798 Hz  
AQ 1.3631488 sec  
RG 34.76  
DW 41.600 usec  
DE 6.50 usec  
TE 298.4 K  
D1 1.00000000 sec  
TD0 1

----- CHANNEL f1 -----  
SFO1 600.137063 MHz  
NUC1 1H  
P1 12.00 usec  
PLW1 21.00000000 W

F2 = Processing parameters  
SI 16384  
SF 600.1370148 MHz  
WDW EN  
SSB 0  
LB 0.30 Hz  
GB 0  
PC 1.00

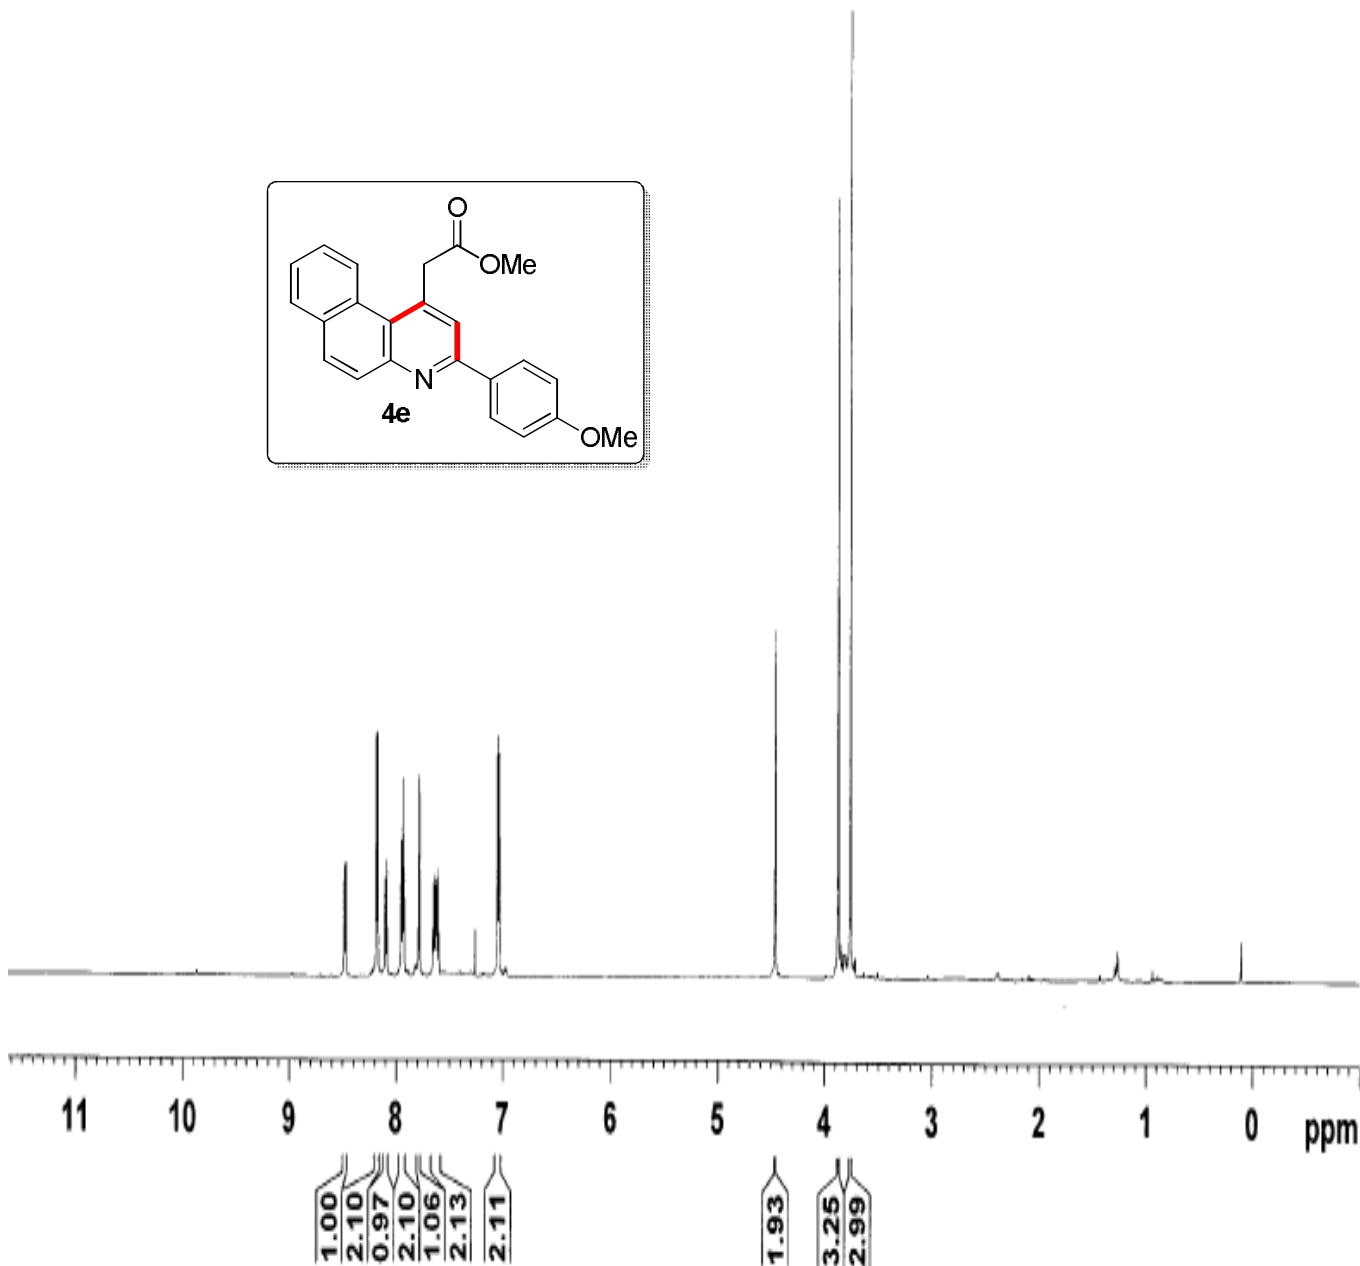

<sup>13</sup>C NMR spectra of compound 4e

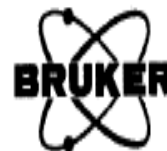

171.22  
 161.08  
 155.26  
 149.96  
 140.96  
 132.99  
 131.84  
 131.50  
 131.25  
 129.89  
 129.40  
 128.97  
 126.79  
 126.72  
 126.61  
 124.06  
 122.66  
 114.40  
 77.44  
 77.23  
 77.02  
 55.53  
 52.72  
 43.65

Current Data Parameters  
 NAME RK-OMe-13C  
 EXPNO 1  
 PROCNO 1

F2 - Acquisition Parameters  
 Date\_ 20141208  
 Time 15.08  
 INSTRUM spect  
 PROBED 5 mm PABBO BB/  
 PULPROG zgpg30  
 TD 32768  
 SOLVENT CDCl3  
 NS 118  
 DS 2  
 SMH 36057.691 Hz  
 FIDRES 1.100393 Hz  
 AQ 0.4543829 sec  
 RG 200.18  
 DM 13.867 usec  
 DE 6.50 usec  
 TE 298.4 K  
 D1 2.00000000 sec  
 D11 0.03000000 sec  
 TDO 1

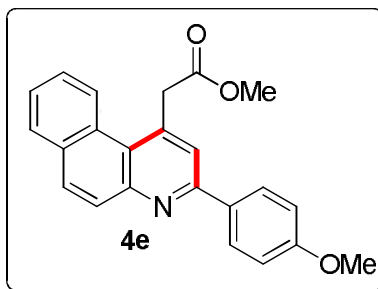

CHANNEL f1  
 SFO1 150.9279571 MHz  
 NUC1 13C  
 P1 10.50 usec  
 PLW1 95.00000000 W

CHANNEL f2  
 SFO2 600.1724007 MHz  
 NUC2 1H  
 CPDPRG(2) waltz16  
 PCPD2 70.00 usec  
 PLW2 21.00000000 W  
 PLW12 0.61714000 W  
 PLW13 0.30239999 W

F2 - Processing parameters  
 SI 16384  
 SF 150.9128452 MHz  
 NDM EM  
 SSB 0  
 LB 1.00 Hz  
 GB 0  
 PC 1.40

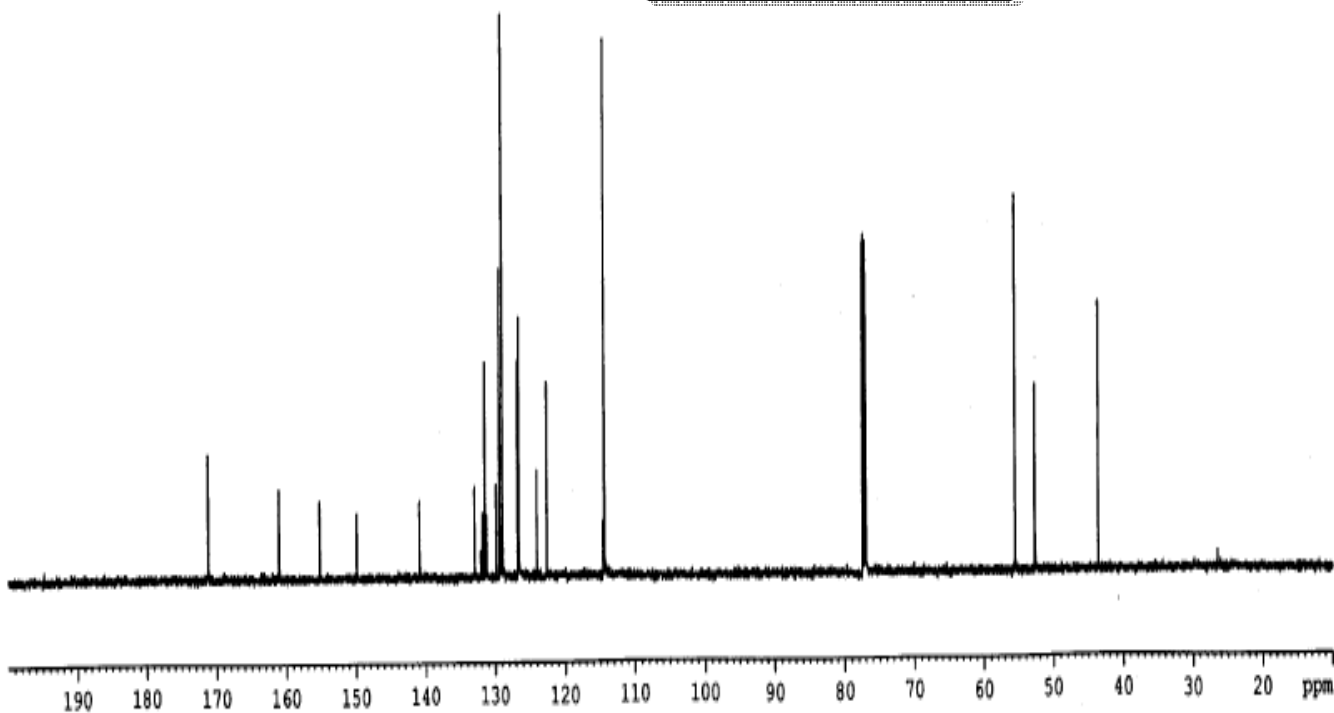



HRMS spectra of compound 4e

|               |              |             |        |                 |              |                        |                        |
|---------------|--------------|-------------|--------|-----------------|--------------|------------------------|------------------------|
| Sample Name   | RK-OME-OME   | Position    | Vial 1 | Instrument Name | Instrument 1 | User Name              |                        |
| Inj Vol       | -10          | InjPosition |        | SampleType      | Sample       | IRM Calibration Status | Success                |
| Data Filename | RK-OME-OME.d | ACQ Method  |        | Comment         |              | Acquired Time          | 12/10/2014 11:33:51 AM |

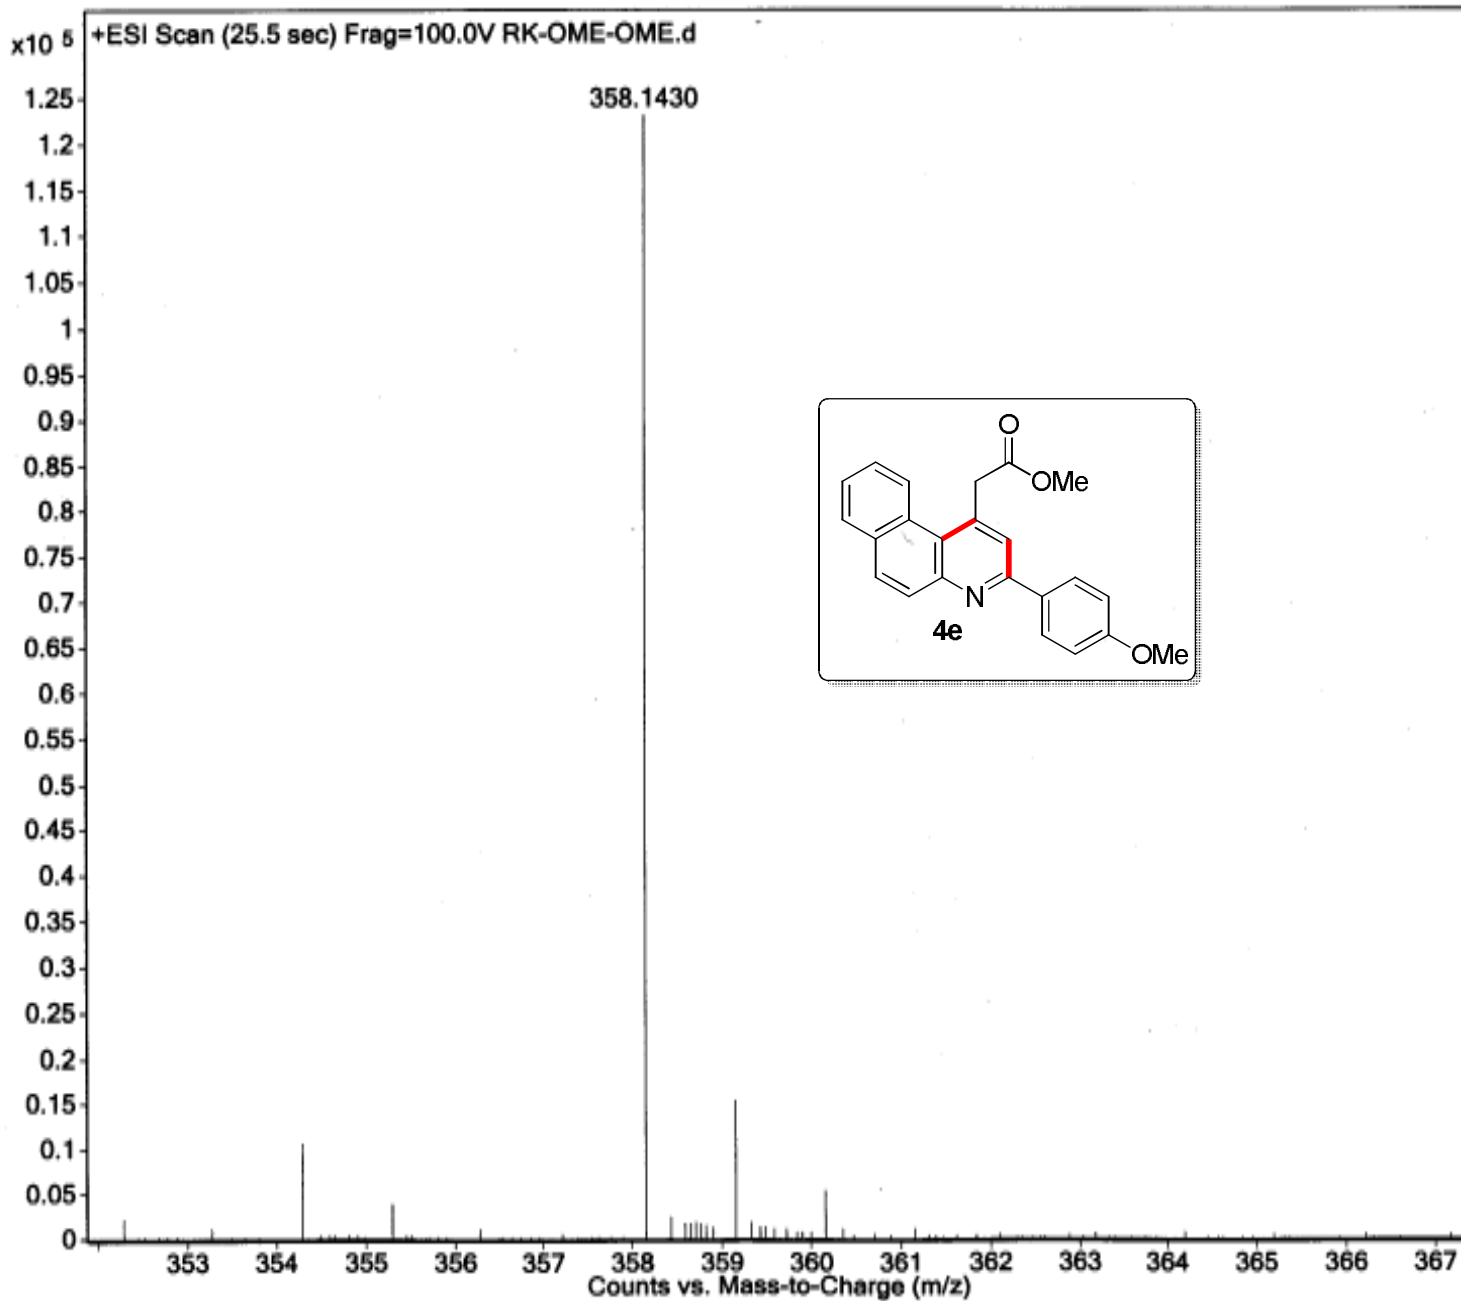

*<sup>1</sup>H NMR spectra of compound 4f*

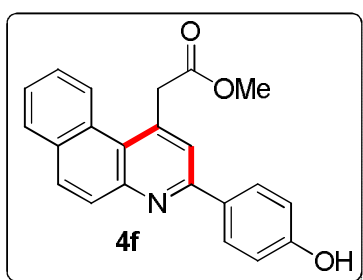

Current Data Parameters  
NAME RK-002-1H  
EXPNO 1  
PROCNO 1

F2 - Acquisition Parameters  
Date\_ 20141007  
Time 10.58  
INSTRUM spect  
PROBHD 5 mm PABBO BB/  
PULPROG zg30  
TD 32768  
SOLVENT CDCl3  
NS 16  
DS 2  
SWH 12019.230 Hz  
FIDRES 0.366798 Hz  
AQ 1.3631488 sec  
RG 113  
DW 41.600 usec  
DE 6.50 usec  
TE 299.0 K  
D1 1.00000000 sec  
TDO 1

----- CHANNEL f1 -----  
SFO1 600.1737063 MHz  
NUC1 1H  
P1 12.00 usec  
PLW1 21.00000000 W

F2 - Processing parameters  
SI 16384  
SF 600.1728581 MHz  
WDW EM  
SSB 0  
LB 0.30 Hz  
GB 0  
PC 1.00

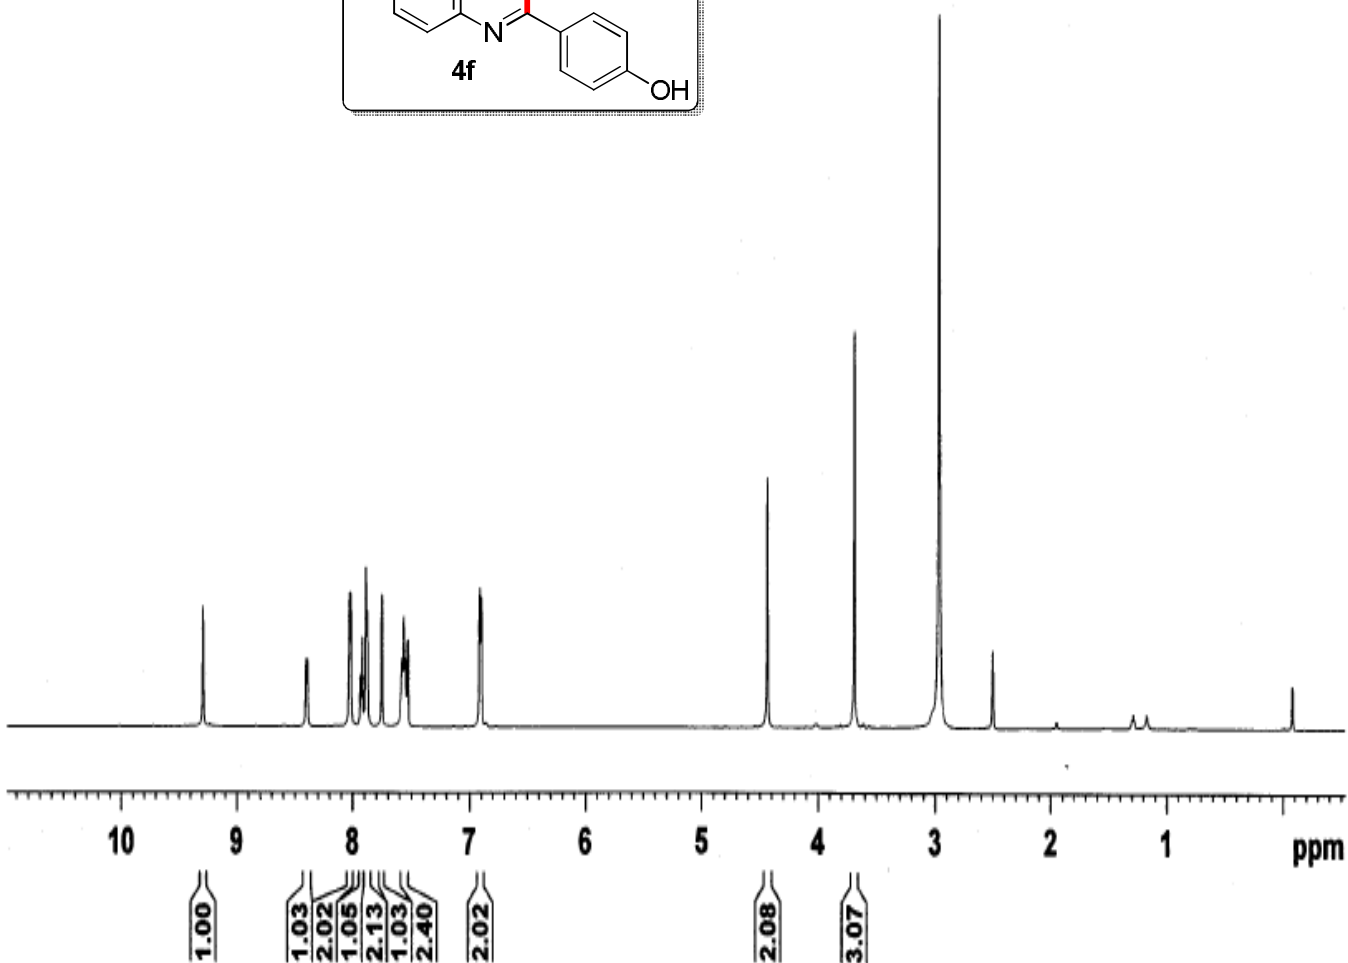

<sup>13</sup>C NMR spectra of compound 4f

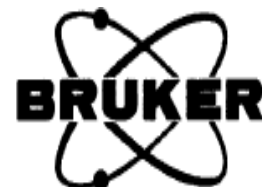

Current Data Parameters  
NAME RK-4-OH-OMe-13C  
EXPNO 1  
PROCNO 1

F2 - Acquisition Parameters  
Date\_ 20141007  
Time 12.53  
INSTRUM spect  
PROBHD 5 mm PABBO BB/  
PULPROG zgpg30  
TD 32768  
SOLVENT CDCl3  
NS 383  
DS 2  
SWH 36057.691 Hz  
FIDRES 1.100393 Hz  
AQ 0.4543829 sec  
RG 65.24  
DW 13.867 usec  
DE 6.50 usec  
TE 299.4 K  
D1 2.00000000 sec  
D11 0.03000000 sec  
TDO 1

===== CHANNEL f1 =====  
SFO1 150.9279571 MHz  
NUC1 13C  
P1 10.50 usec  
PLW1 95.00000000 W

===== CHANNEL f2 =====  
SFO2 600.1724007 MHz  
NUC2 1H  
CPDPRG[2] waltz16  
PCPD2 70.00 usec  
PLW2 21.00000000 W  
PLW12 0.61714000 W  
PLW13 0.30239999 W

F2 - Processing parameters  
SI 16384  
SF 150.9136798 MHz  
WDW EM  
SSB 0  
LB 1.00 Hz  
GB 0  
PC 1.40

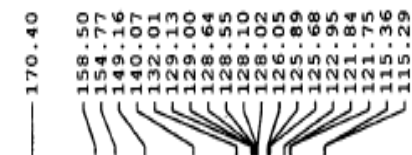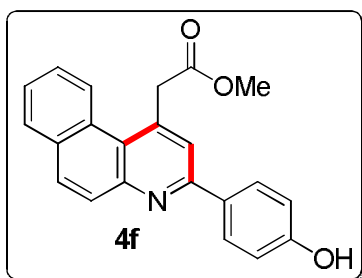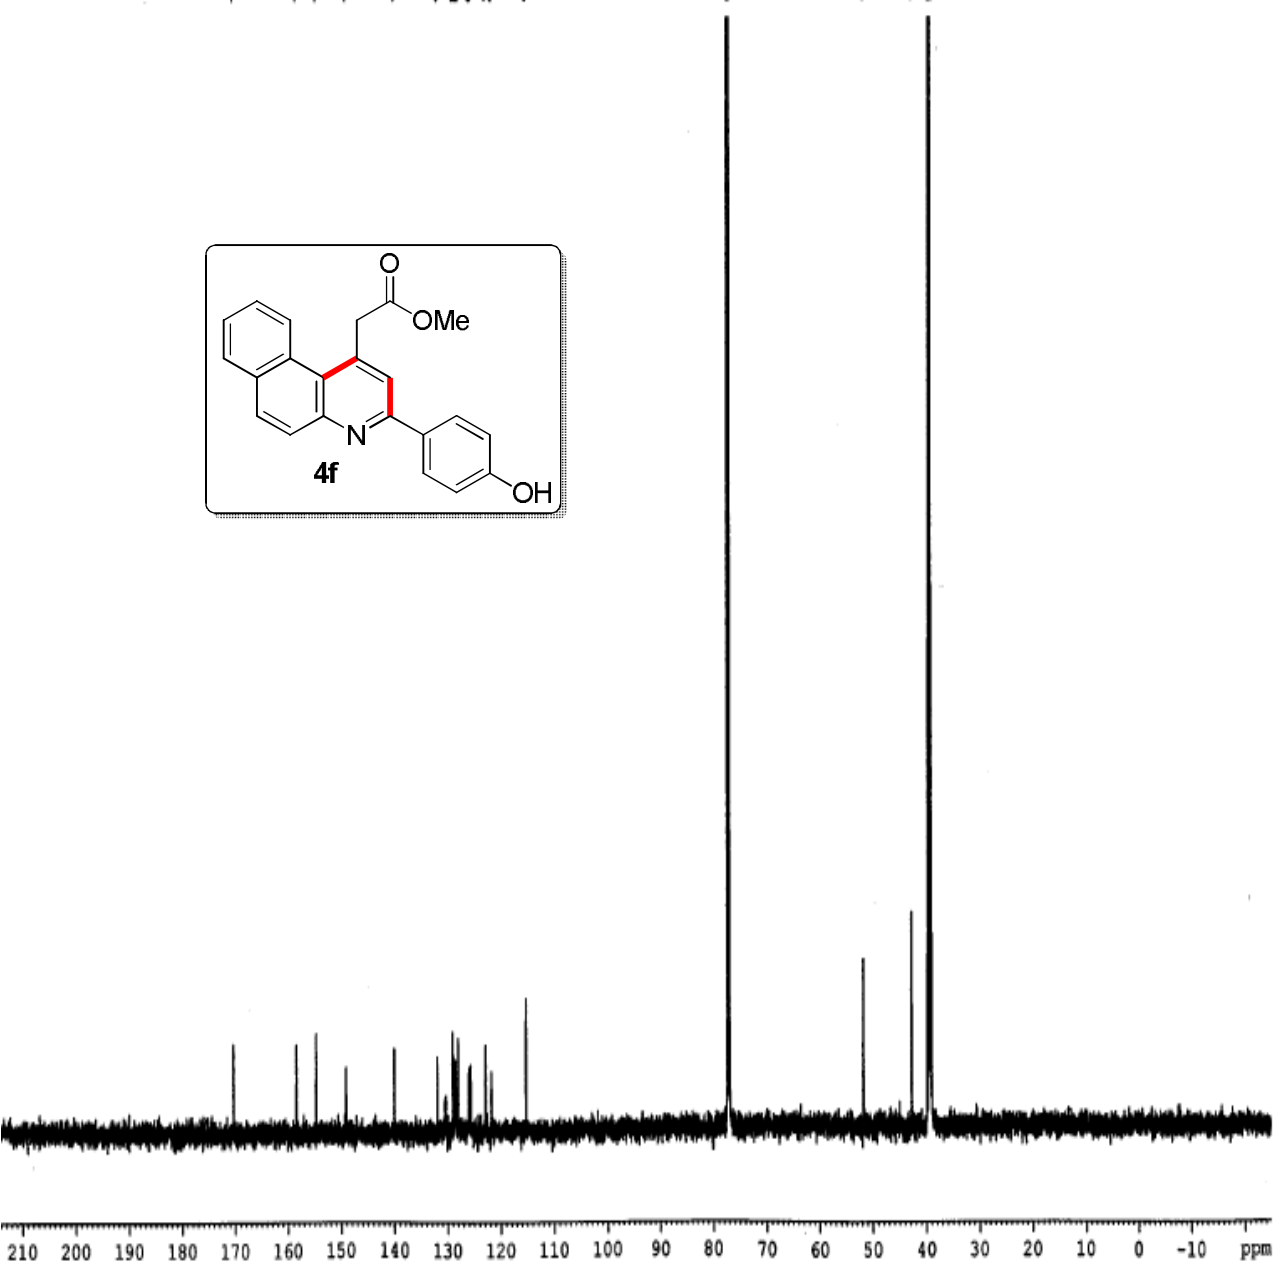

*HRMS spectra of compound 4f*

|               |           |             |    |                 |              |                        |                        |
|---------------|-----------|-------------|----|-----------------|--------------|------------------------|------------------------|
| Sample Name   | RK-4-OH   | Position    | -1 | Instrument Name | Instrument 1 | User Name              |                        |
| Inj Vol       | -10       | InjPosition |    | SampleType      | Sample       | IRM Calibration Status | Success                |
| Data Filename | RK-4-OH.d | ACQ Method  |    | Comment         |              | Acquired Time          | 10/30/2014 11:47:22 AM |

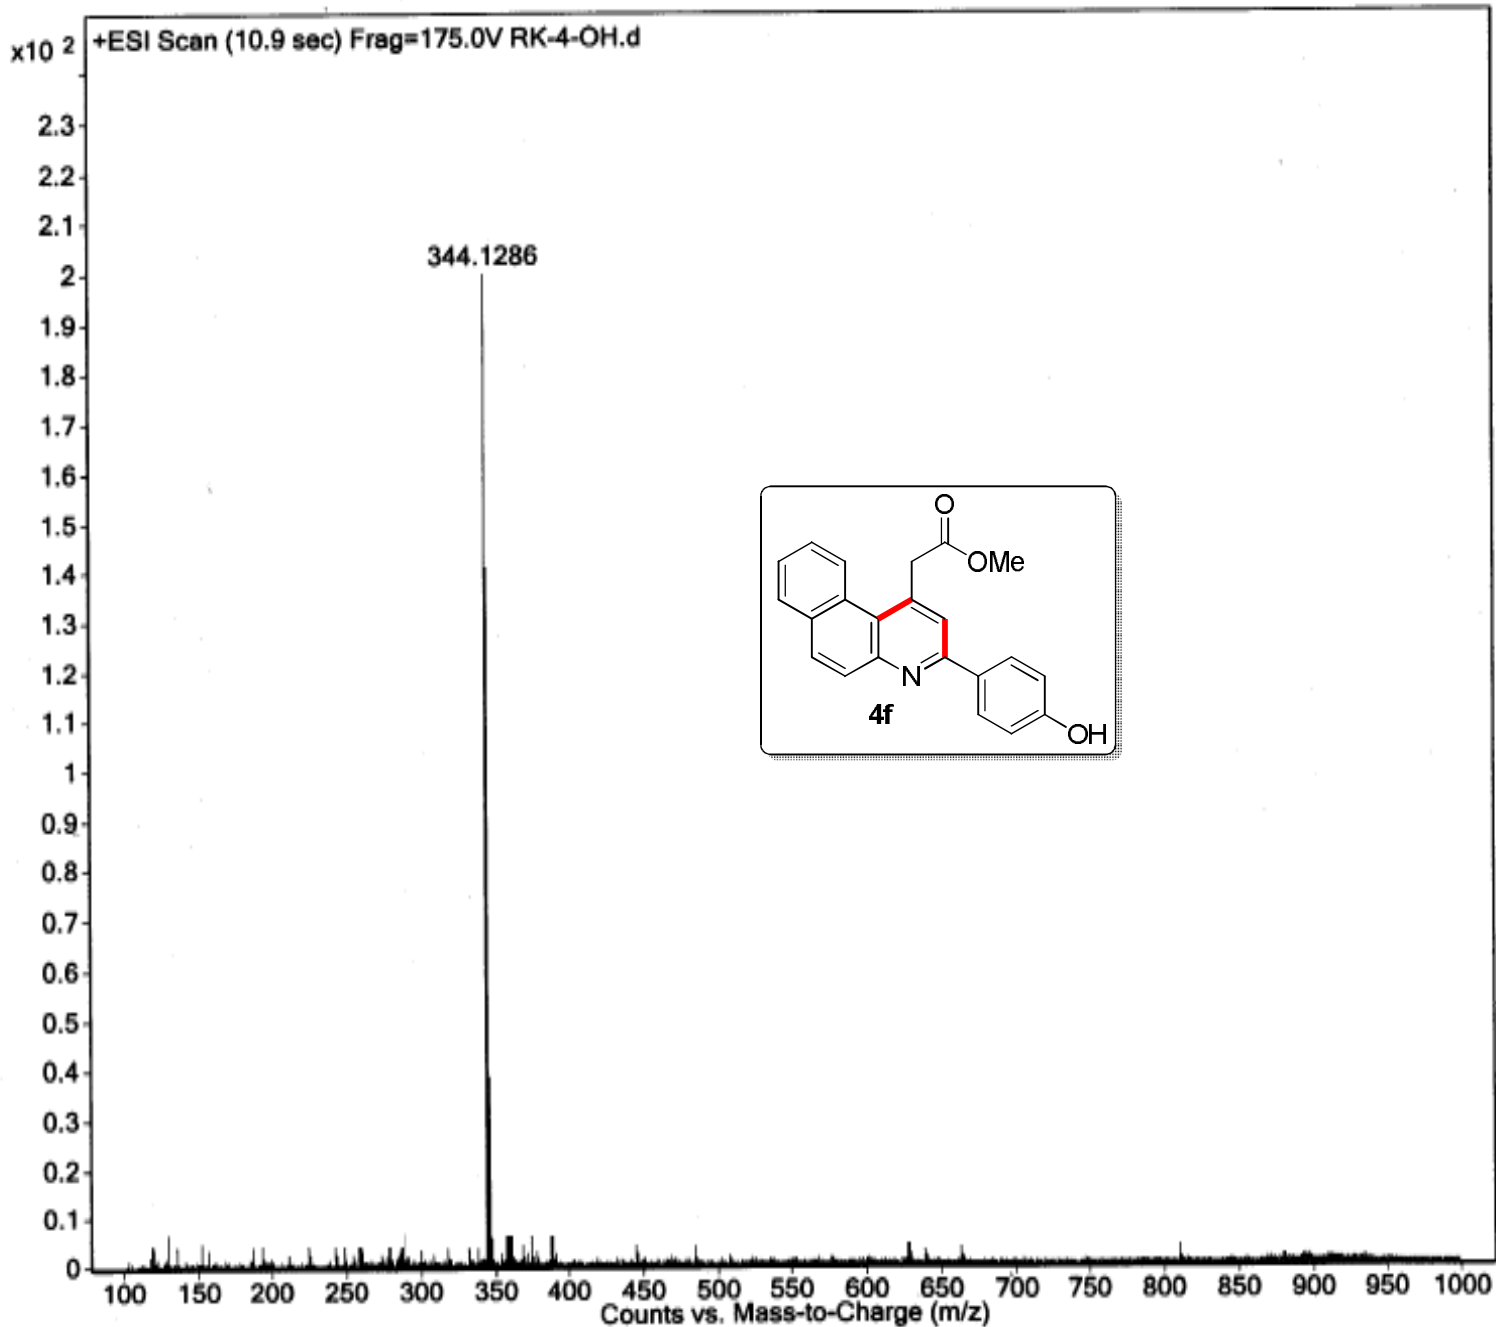

*<sup>1</sup>H NMR spectra of compound 4g*

Current Data Parameters  
NAME RK-4F-OTBu-1H  
EXPNO 1  
PROCNO 1

F2 - Acquisition Parameters  
Date\_ 20140930  
Time 13.08  
INSTRUM spect  
PROBHD 5 mm VABBO BB/  
PULPROG zg30  
TD 32768  
SOLVENT CDCl3  
NS 16  
DS 2  
SWH 12019.230 Hz  
FIDRES 0.366798 Hz  
AQ 1.3631488 sec  
RG 80.22  
DM 41.600 usec  
DE 6.50 usec  
TE 298.5 K  
D1 1.00000000 sec  
TDO 1

----- CHANNEL f1 -----  
SF01 600.1737063 MHz  
NUC1 1H  
P1 12.00 usec  
PLW1 21.00000000 W

F2 - Processing parameters  
SI 16384  
SF 600.1700148 MHz  
WDW EM  
LN 0.30 Hz  
GB  
PC 1.00

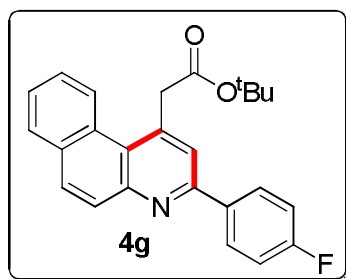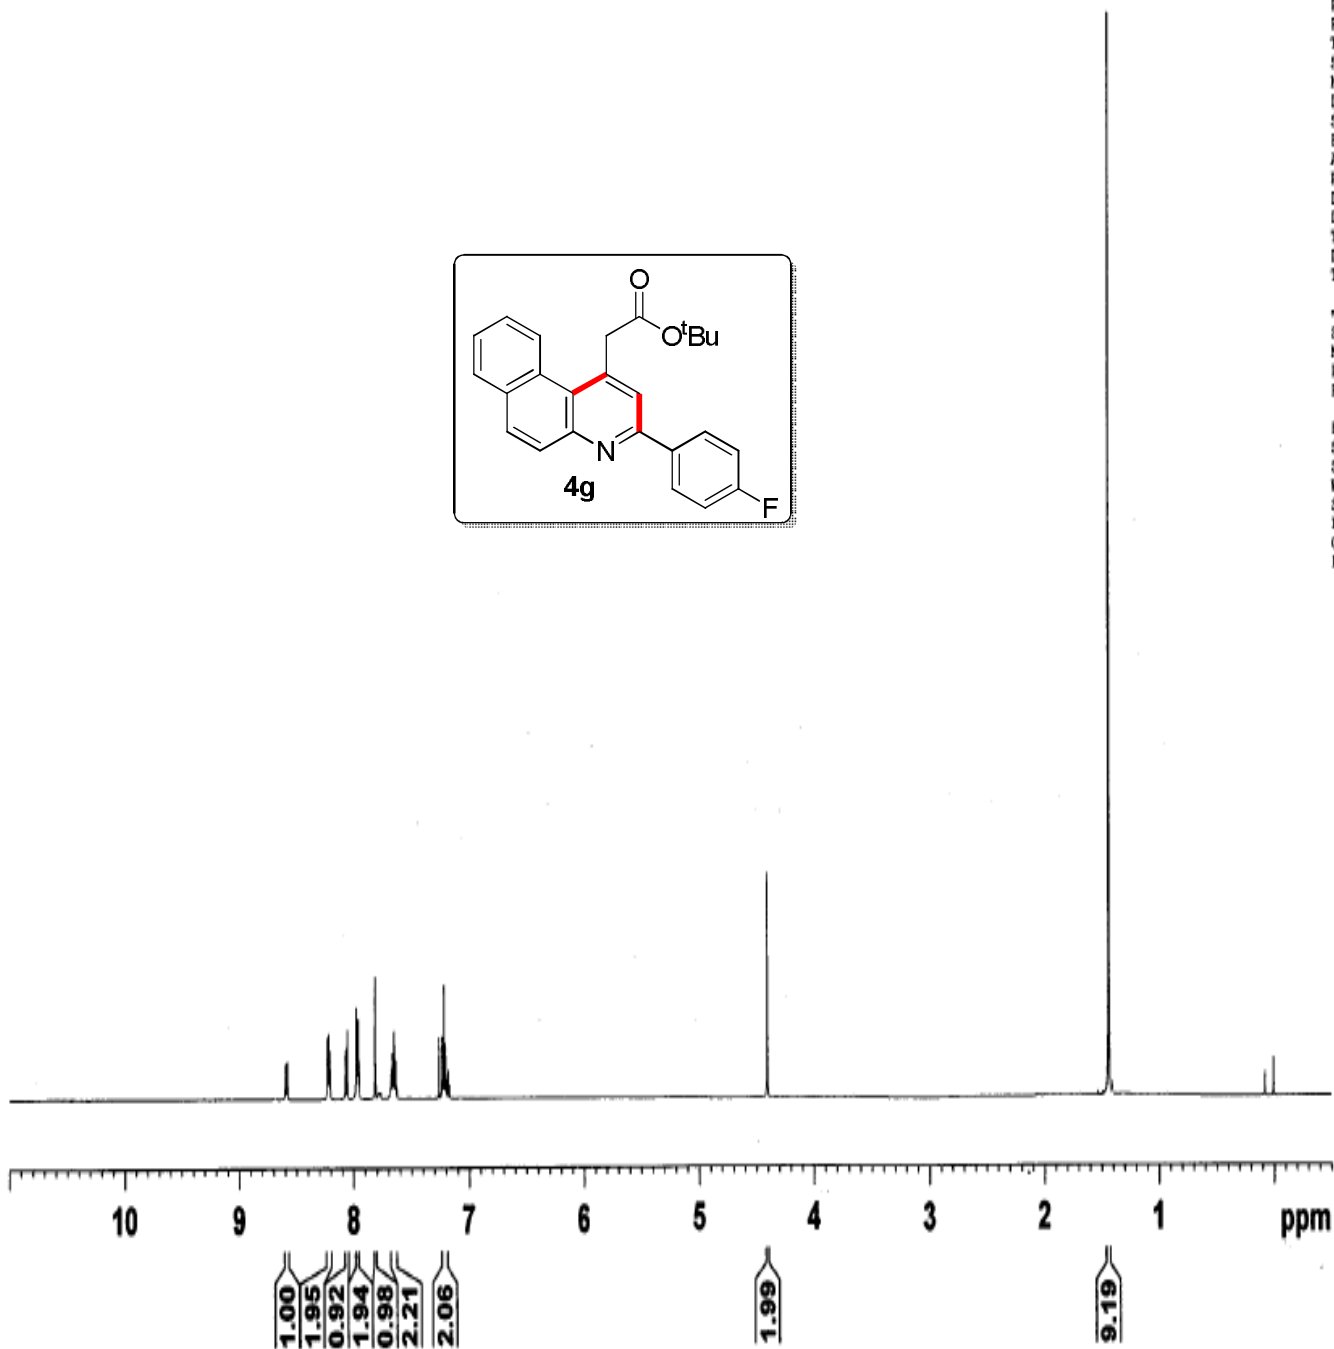

*<sup>13</sup>C NMR spectra of compound 4g*

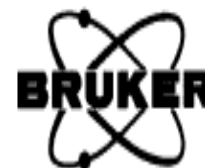

169.49  
165.18  
163.53  
154.12  
133.47  
133.14  
131.19  
131.13  
130.27  
130.09  
129.73  
129.57  
129.33  
128.31  
127.32  
127.24  
127.18  
127.01  
126.65  
124.83  
123.61  
116.30  
116.16  
115.64  
115.50

82.56  
77.45  
77.23  
77.03

45.56

29.22

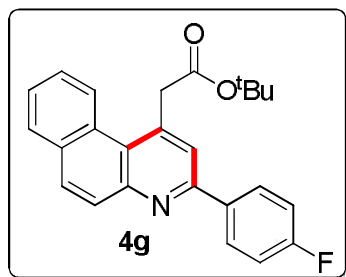

Current Data Parameters  
NAME *AN-4F-CBu-Final-13C*  
EXFNO 1  
PROCNO 1

F2 - Acquisition Parameters  
Date\_ 20141205  
Time 13.13  
INSTRUM spect  
PROBHD 5 mm PABBO BB/  
PULPROG zgpg30  
TD 32768  
SOLVENT CDCl3  
NS 2077  
DS 2  
SWH 3607.691 Hz  
FIDRES 1.100393 Hz  
AQ 0.4543829 sec  
RG 65.24  
RW 13.867 usec  
DE 6.50 usec  
TE 299.4 K  
D1 2.0000000 sec  
D11 0.0300000 sec  
TDO 1

===== CHANNEL f1 =====  
SFO1 150.9279571 MHz  
NUC1 13C  
P1 10.50 usec  
PLM1 95.0000000 W

===== CHANNEL f2 =====  
SFO2 609.1724097 MHz  
NUC2 1H  
CPDPRG2 waltz16  
PCPD2 70.00 usec  
PLM2 21.0000000 W  
PLM3 0.61714000 W  
PLM3 0.30239999 W

F2 - Processing parameters  
SI 16384  
SF 150.9128345 MHz  
WDW EM  
SSB 0  
LB 1.00 Hz  
GB 0  
PC 1.40

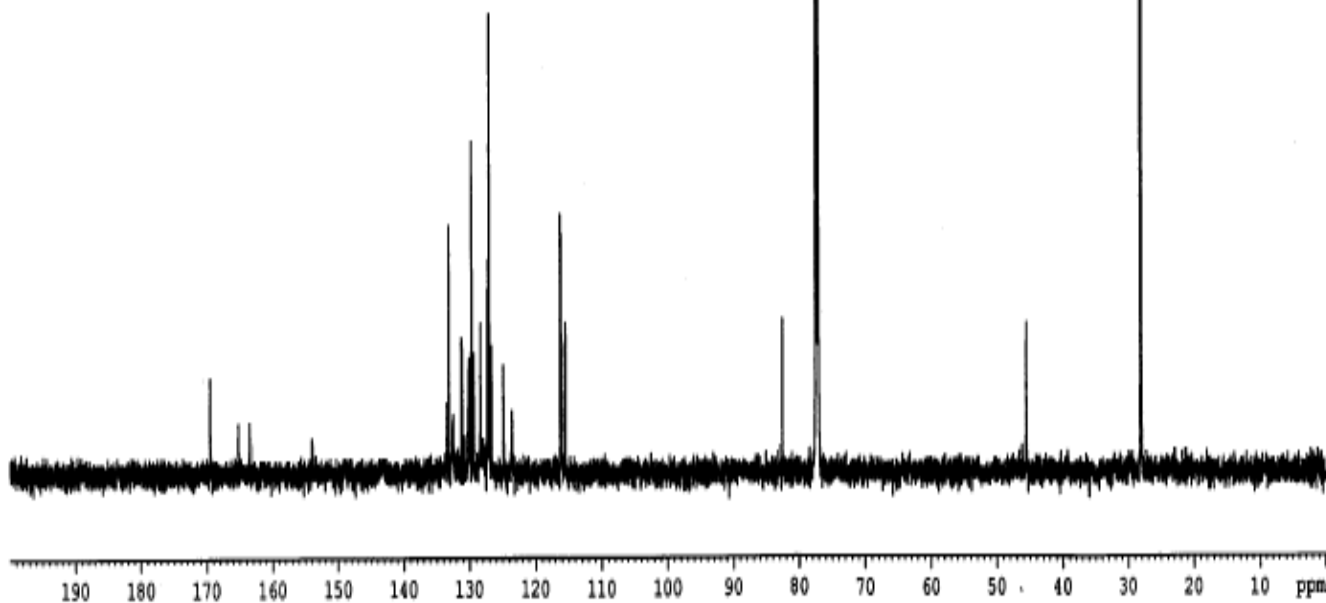

HRMS spectra of compound 4g

|               |             |             |    |                 |              |                        |                        |
|---------------|-------------|-------------|----|-----------------|--------------|------------------------|------------------------|
| Sample Name   | RK-4-F-OT   | Position    | -1 | Instrument Name | Instrument 1 | User Name              |                        |
| Inj Vol       | -10         | InjPosition |    | SampleType      | Sample       | IRM Calibration Status | Success                |
| Data Filename | RK-4-F-OT.d | ACQ Method  |    | Comment         |              | Acquired Time          | 10/30/2014 11:48:52 AM |

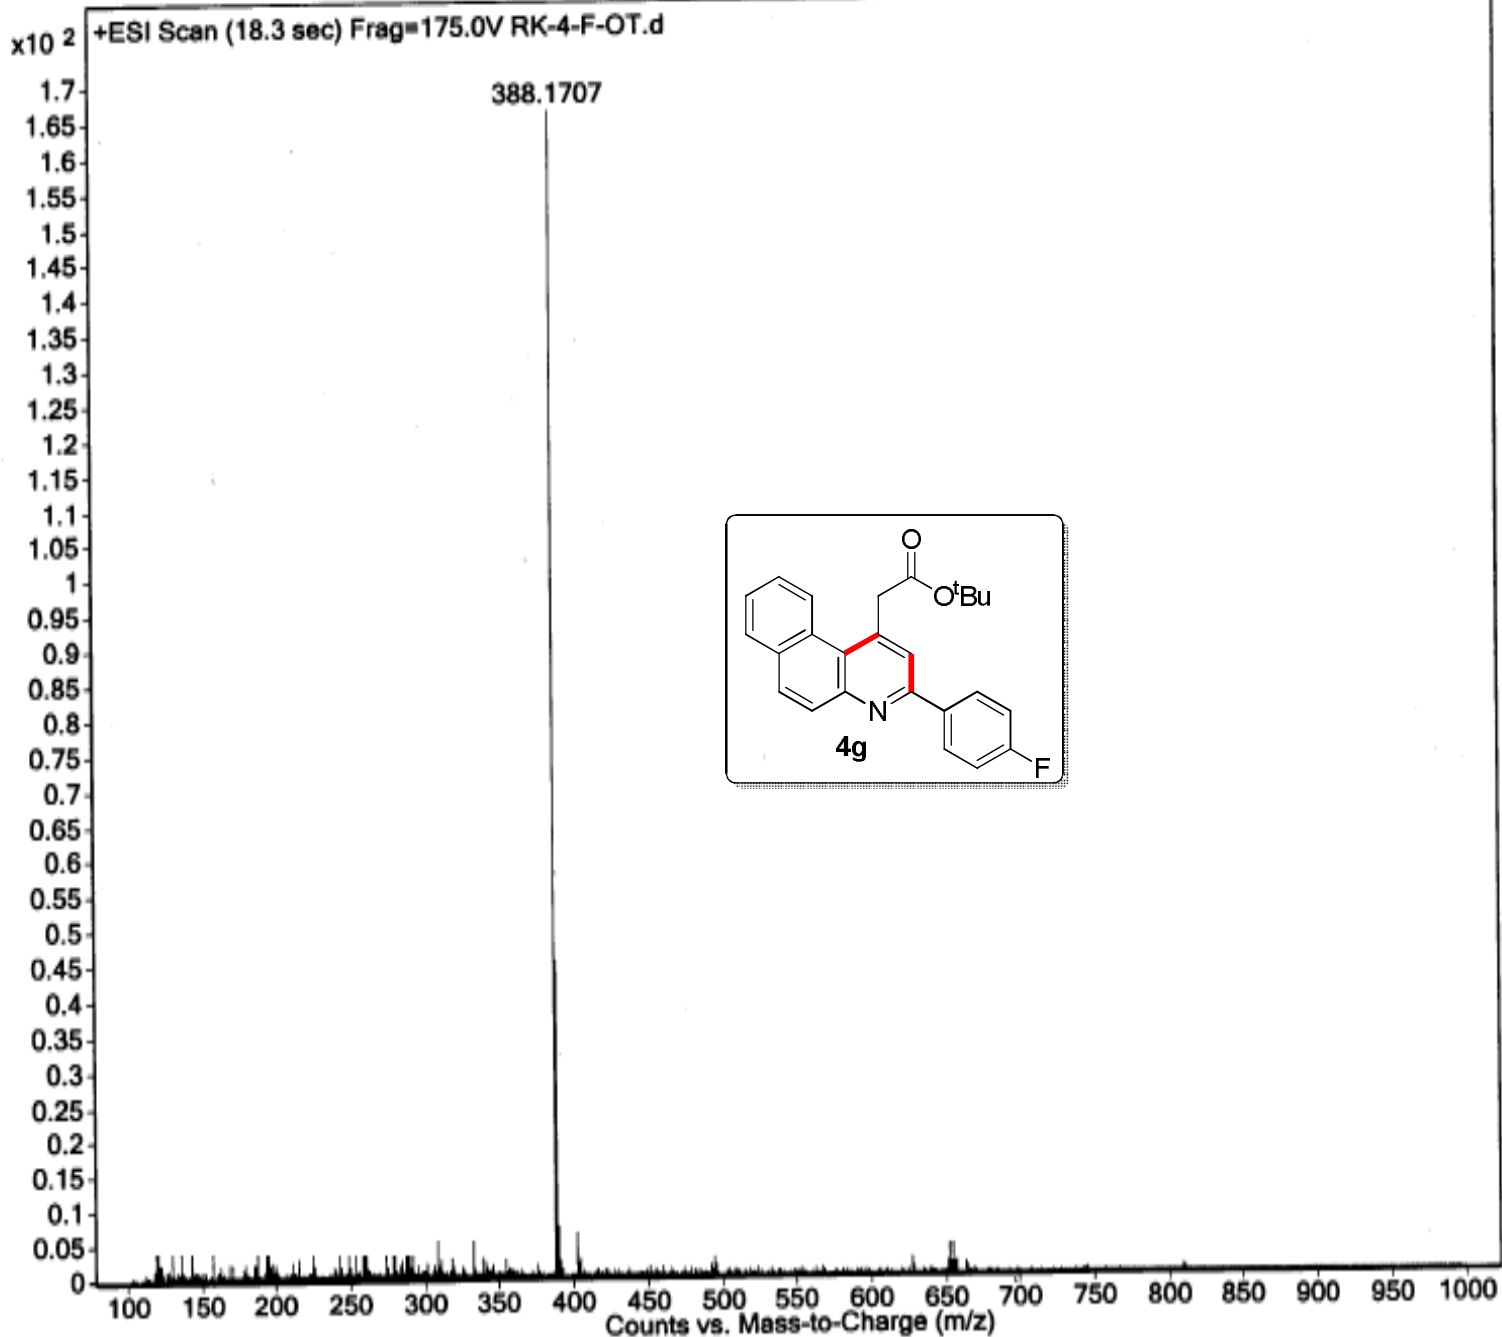

*<sup>1</sup>H NMR spectra of compound 4h*

RK-FUR-N2-OTBU-3-1H  
RK-FUR-N2-OTBU-3-1H

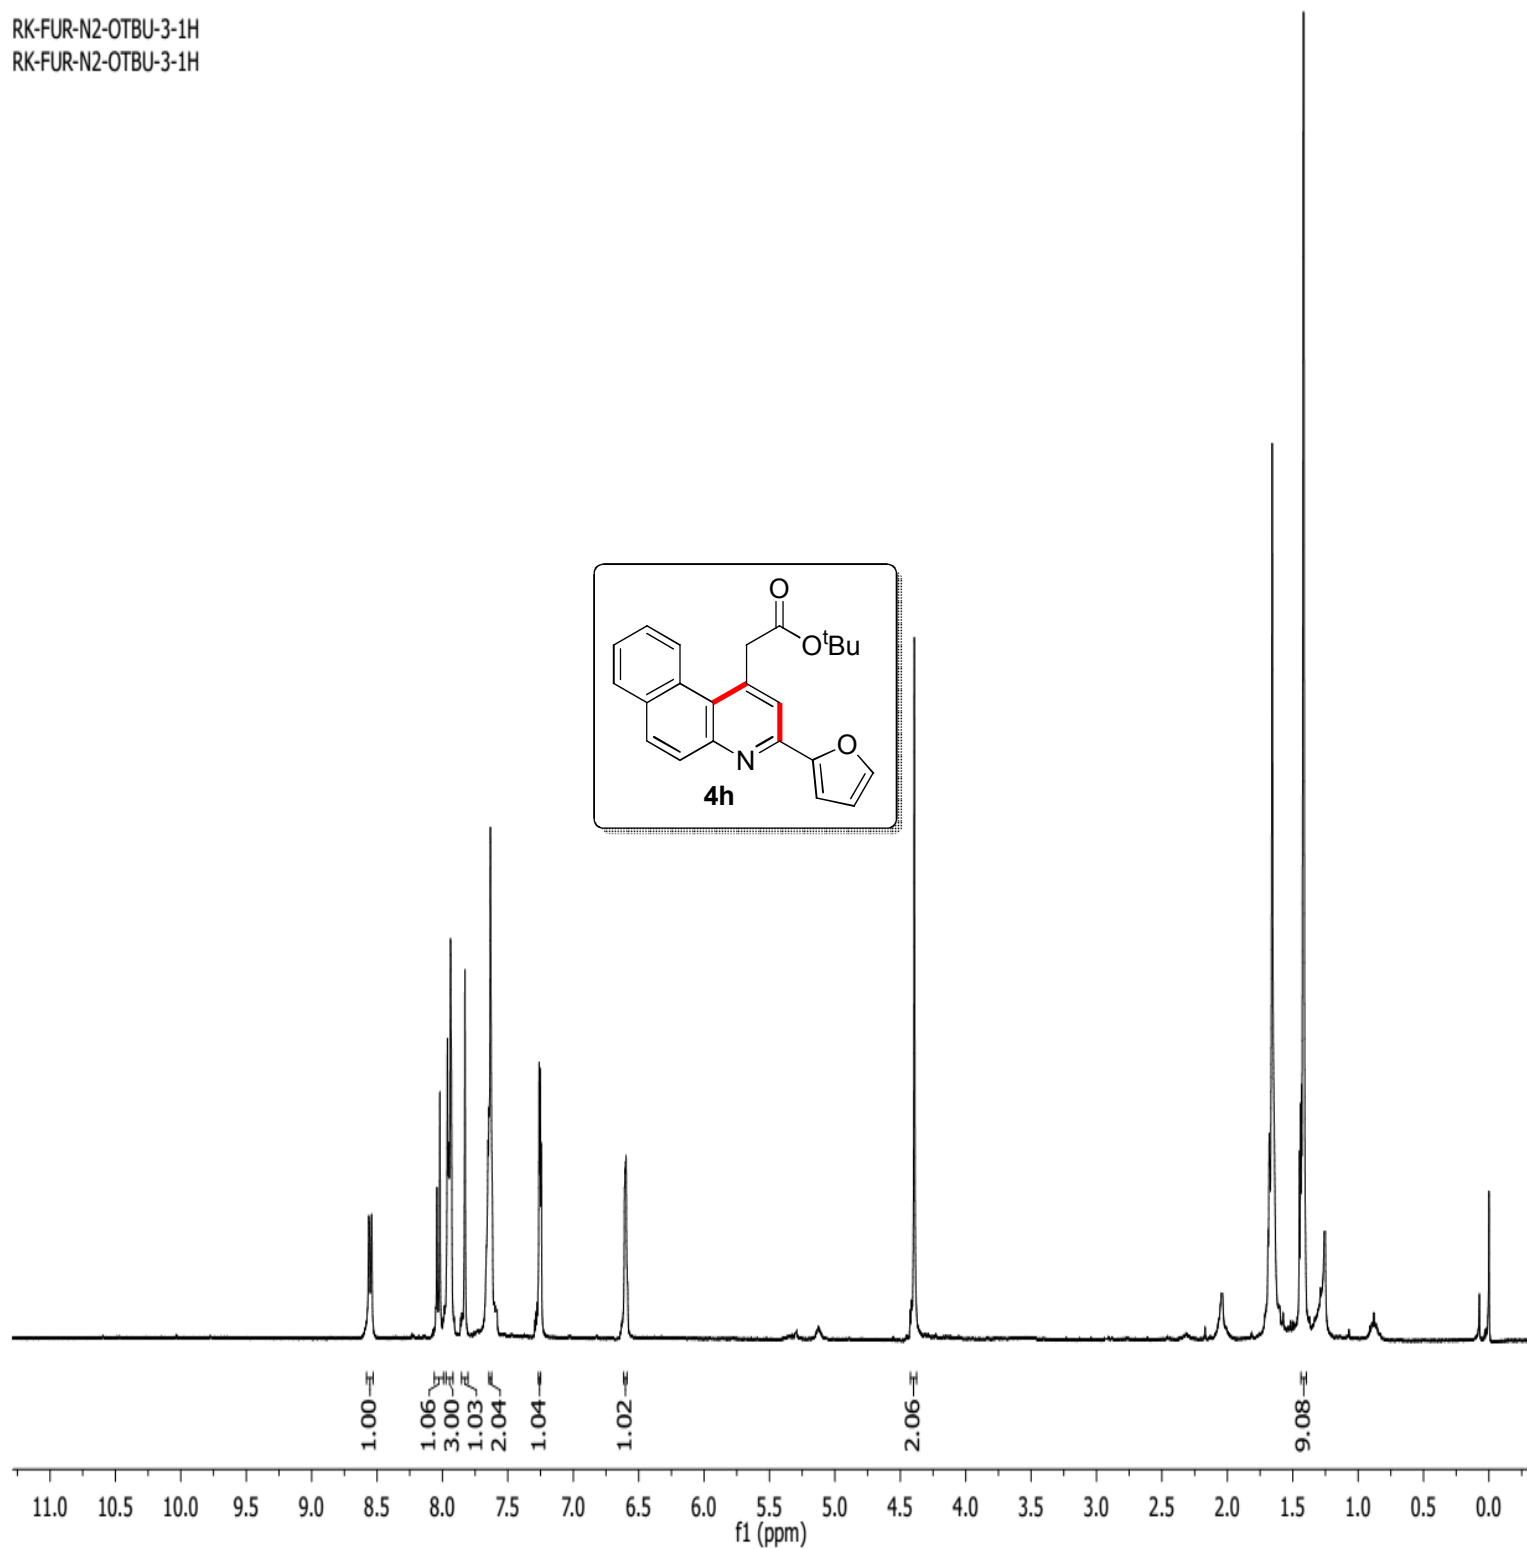



*<sup>13</sup>C NMR spectra of compound 4h*

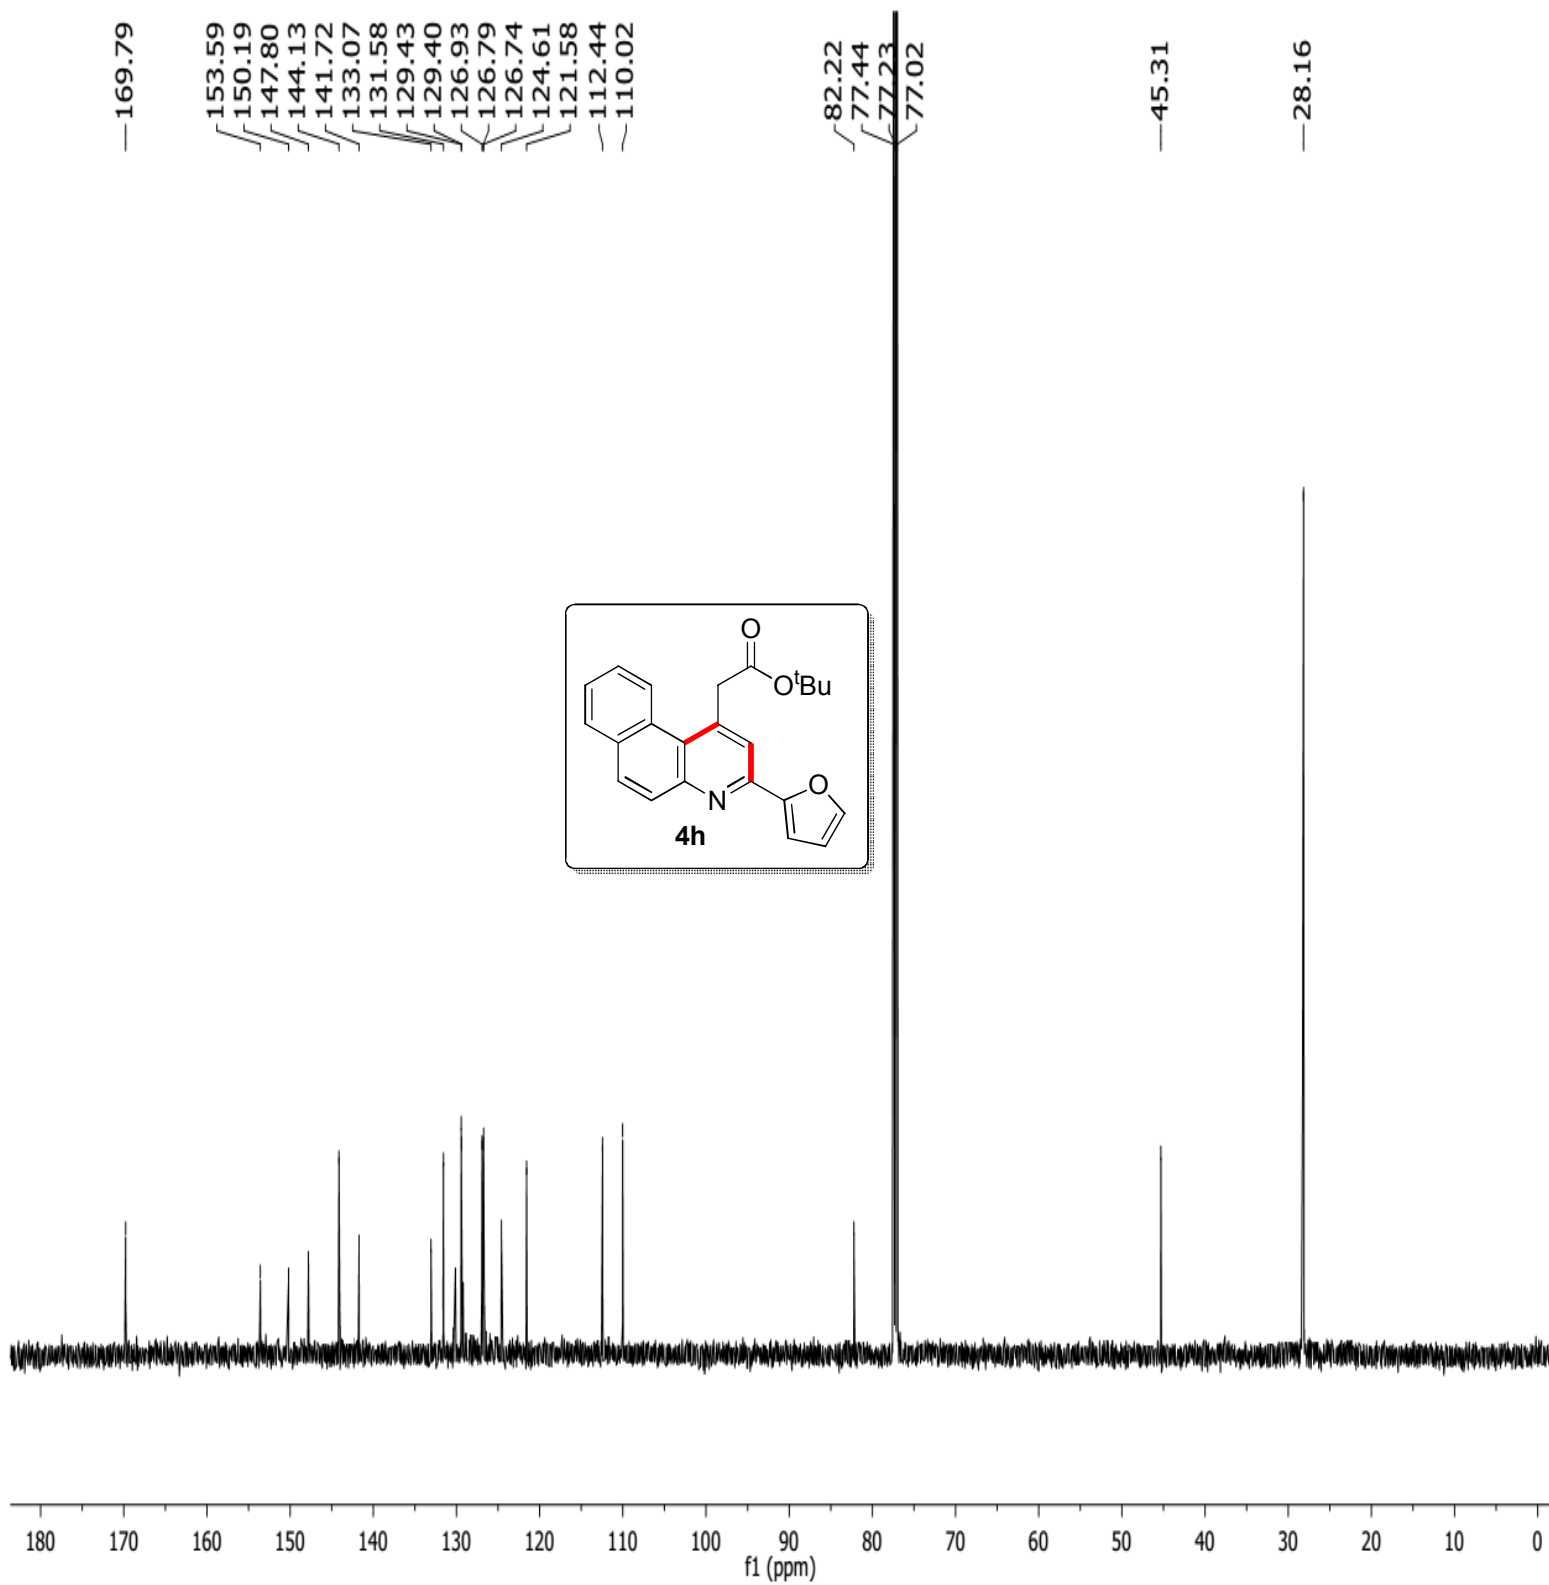

HRMS spectra of compound 4h

|               |              |             |             |                 |                                   |                        |                  |
|---------------|--------------|-------------|-------------|-----------------|-----------------------------------|------------------------|------------------|
| Sample Name   | Unavailable  | Position    | Unavailable | Instrument Name | Unavailable                       | User Name              | Unavailable      |
| Inj Vol       | Unavailable  | InjPosition | Unavailable | SampleType      | Unavailable                       | IRM Calibration Status | Some Ions Missed |
| Data Filename | RK-FUR-OTB.d | ACQ Method  |             | Comment         | Sample information is unavailable | Acquired Time          | Unavailable      |

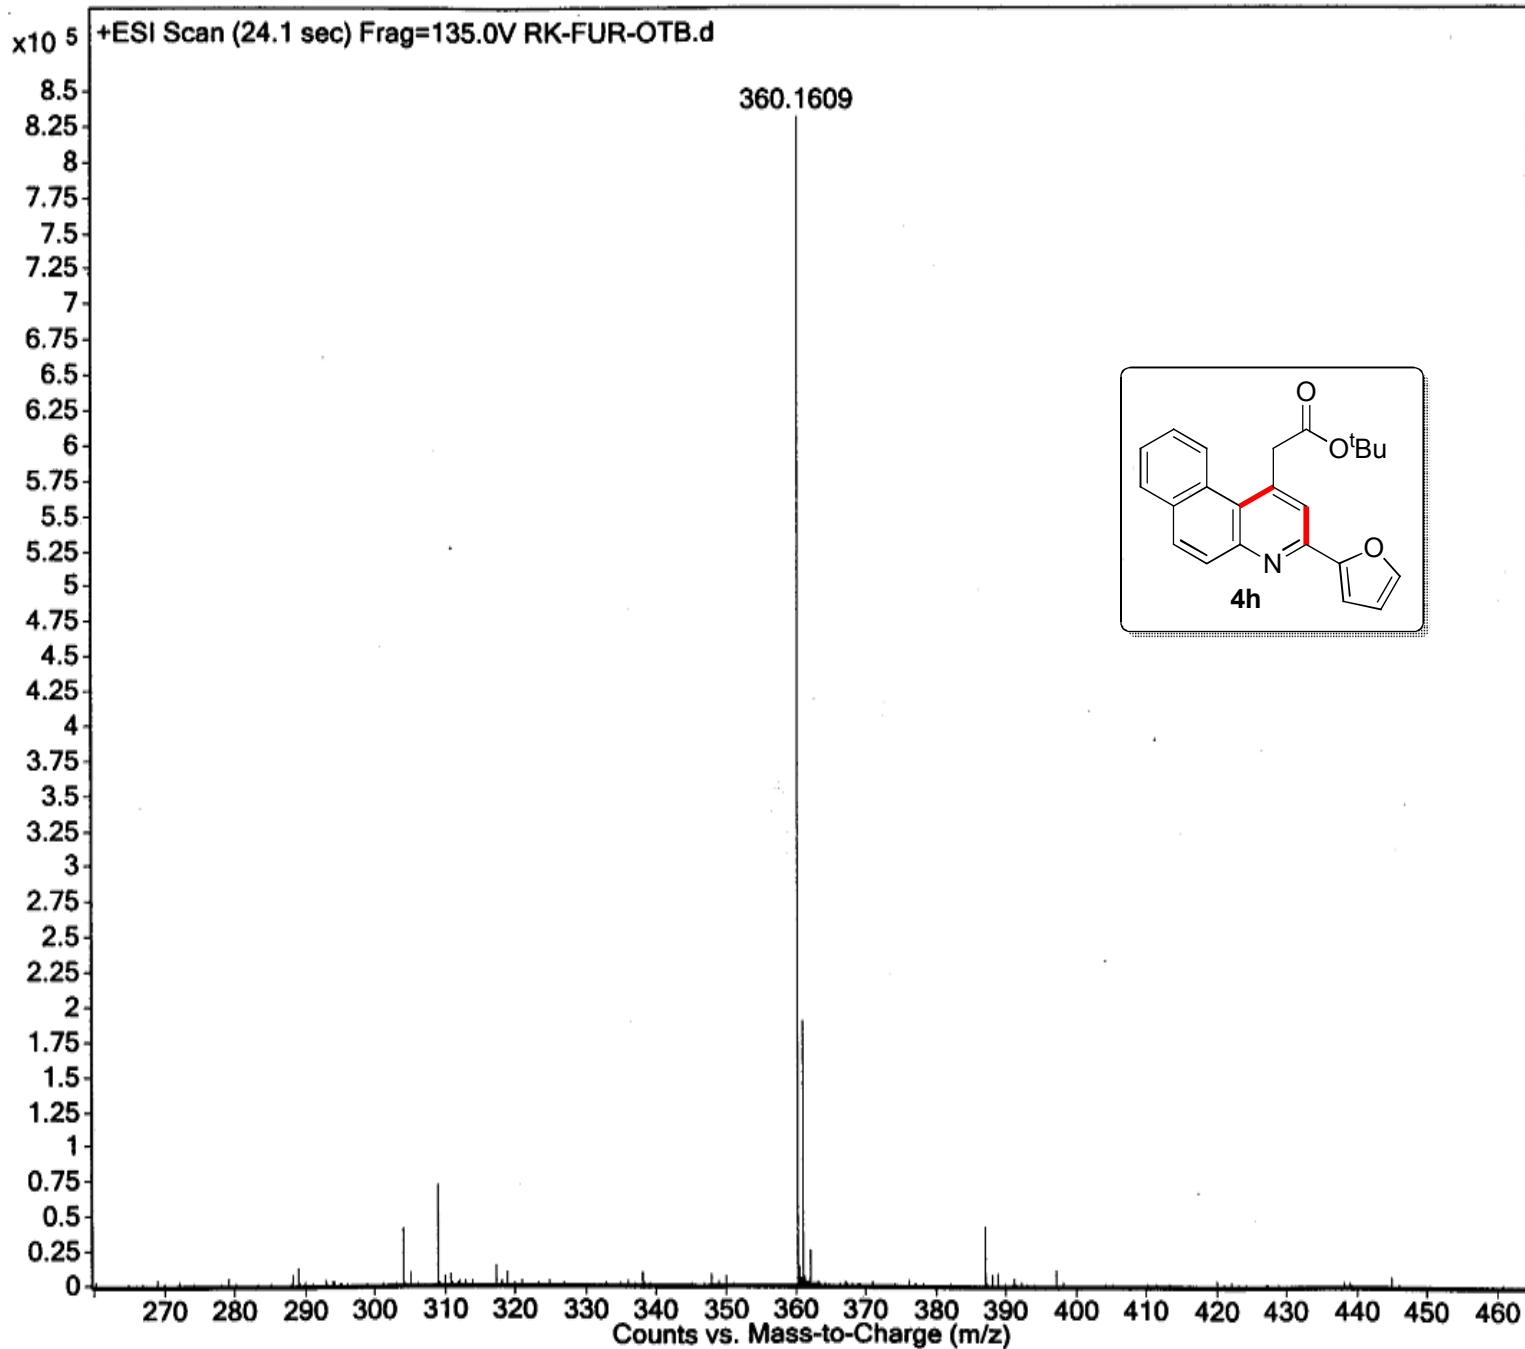

*<sup>1</sup>H NMR spectra of compound 4i*

RK-34-3C-14

Sample Name:

RK-34-3C-14

Data Collected on:

IITG-NMR-mercury400

Archive directory:

Sample directory:

FidFile: RK-34-3C-14

Pulse Sequence: PROTON (s2pul)

Solvent: cdcl3

Data collected on: May 23 2014

Temp. 25.0 C / 298.1 K

Operator: chem

Relax. delay 1.000 sec

Pulse 45.0 degrees

Acq. time 2.561 sec

Width 6398.0 Hz

32 repetitions

OBSERVE H1, 399.8509617 MHz

DATA PROCESSING

FT size 32768

Total time 2 min 12 sec

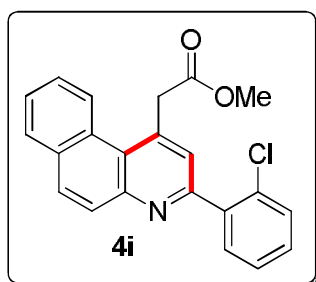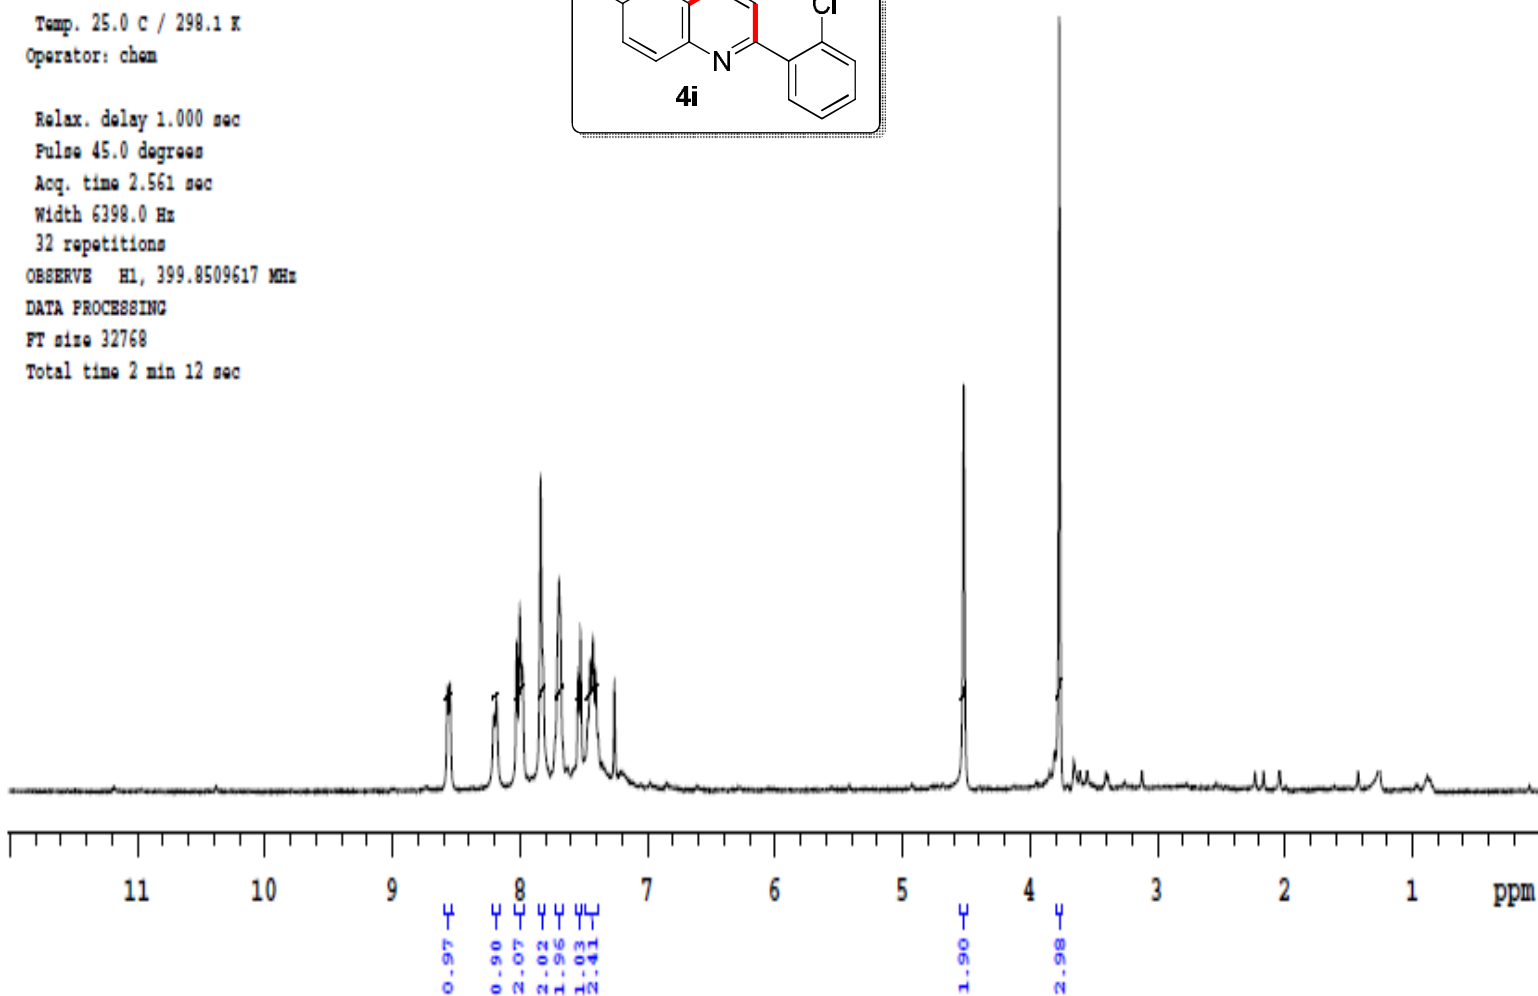

*<sup>13</sup>C NMR spectra of compound 4i*

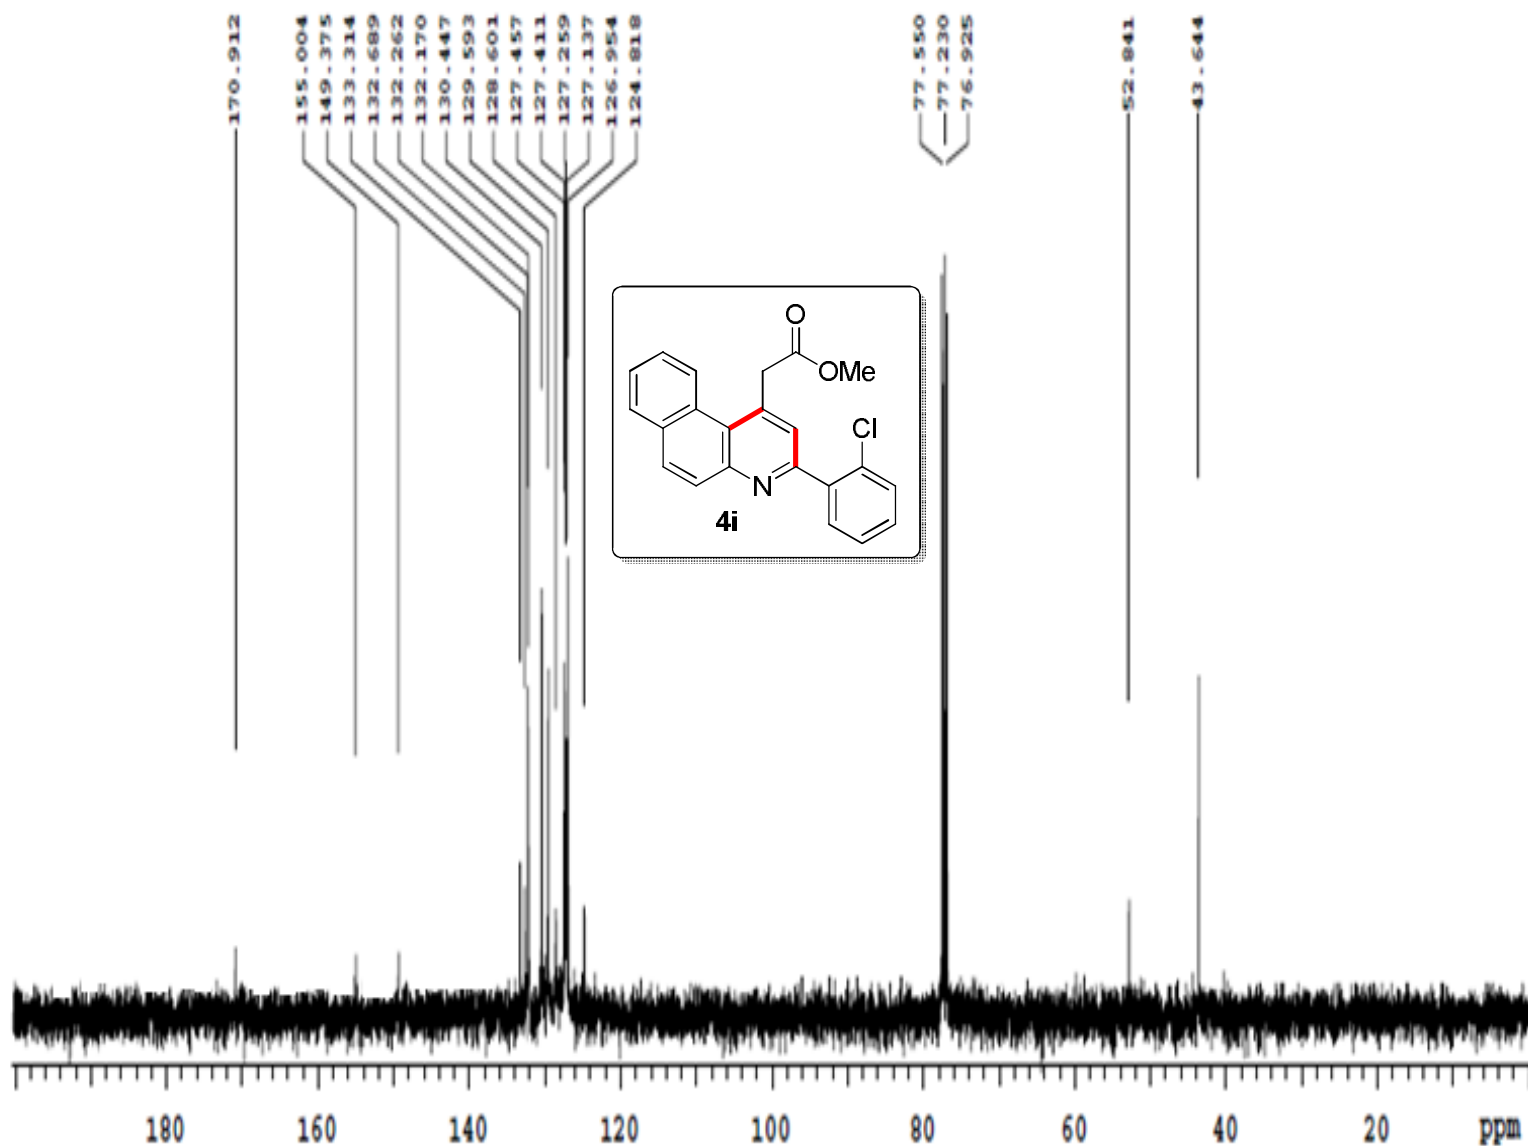

|                                                                                                                                     |                                                                                                                            |                                                                                            |                                                                                                                                         |
|-------------------------------------------------------------------------------------------------------------------------------------|----------------------------------------------------------------------------------------------------------------------------|--------------------------------------------------------------------------------------------|-----------------------------------------------------------------------------------------------------------------------------------------|
| <b>PULSE SEQUENCE</b><br>Relax. delay 1.000 sec<br>Pulse 45.0 degrees<br>Acq. time 0.652 sec<br>Width 25125.6 Hz<br>500 repetitions | <b>OBSERVE</b> C13, 100.5425840<br><b>DECOUPLE</b> H1, 399.8529994<br>Power 42 dB<br>continuously on<br>WALTZ-16 modulated | <b>DATA PROCESSING</b><br>Line broadening 0.5 Hz<br>FT size 32768<br>Total time 15 minutes | <b>RK-34-3C-14</b><br><br>Solvent: cdcl3<br>Temp. 25.0 c / 298.1 K<br>Operator: chem<br>File: RK-34-3C-14-13C<br>Mercury-400 *IITC-NMR* |
|-------------------------------------------------------------------------------------------------------------------------------------|----------------------------------------------------------------------------------------------------------------------------|--------------------------------------------------------------------------------------------|-----------------------------------------------------------------------------------------------------------------------------------------|

HRMS spectra of compound 4i

|               |              |             |    |                 |              |                        |                        |
|---------------|--------------|-------------|----|-----------------|--------------|------------------------|------------------------|
| Sample Name   | RK-2Cl-OEt   | Position    | -1 | Instrument Name | Instrument 1 | User Name              |                        |
| Inj Vol       | -10          | InjPosition |    | SampleType      | Sample       | IRM Calibration Status | Success                |
| Data Filename | RK-2Cl-OEt.d | ACQ Method  |    | Comment         |              | Acquired Time          | 11/11/2014 12:00:24 PM |

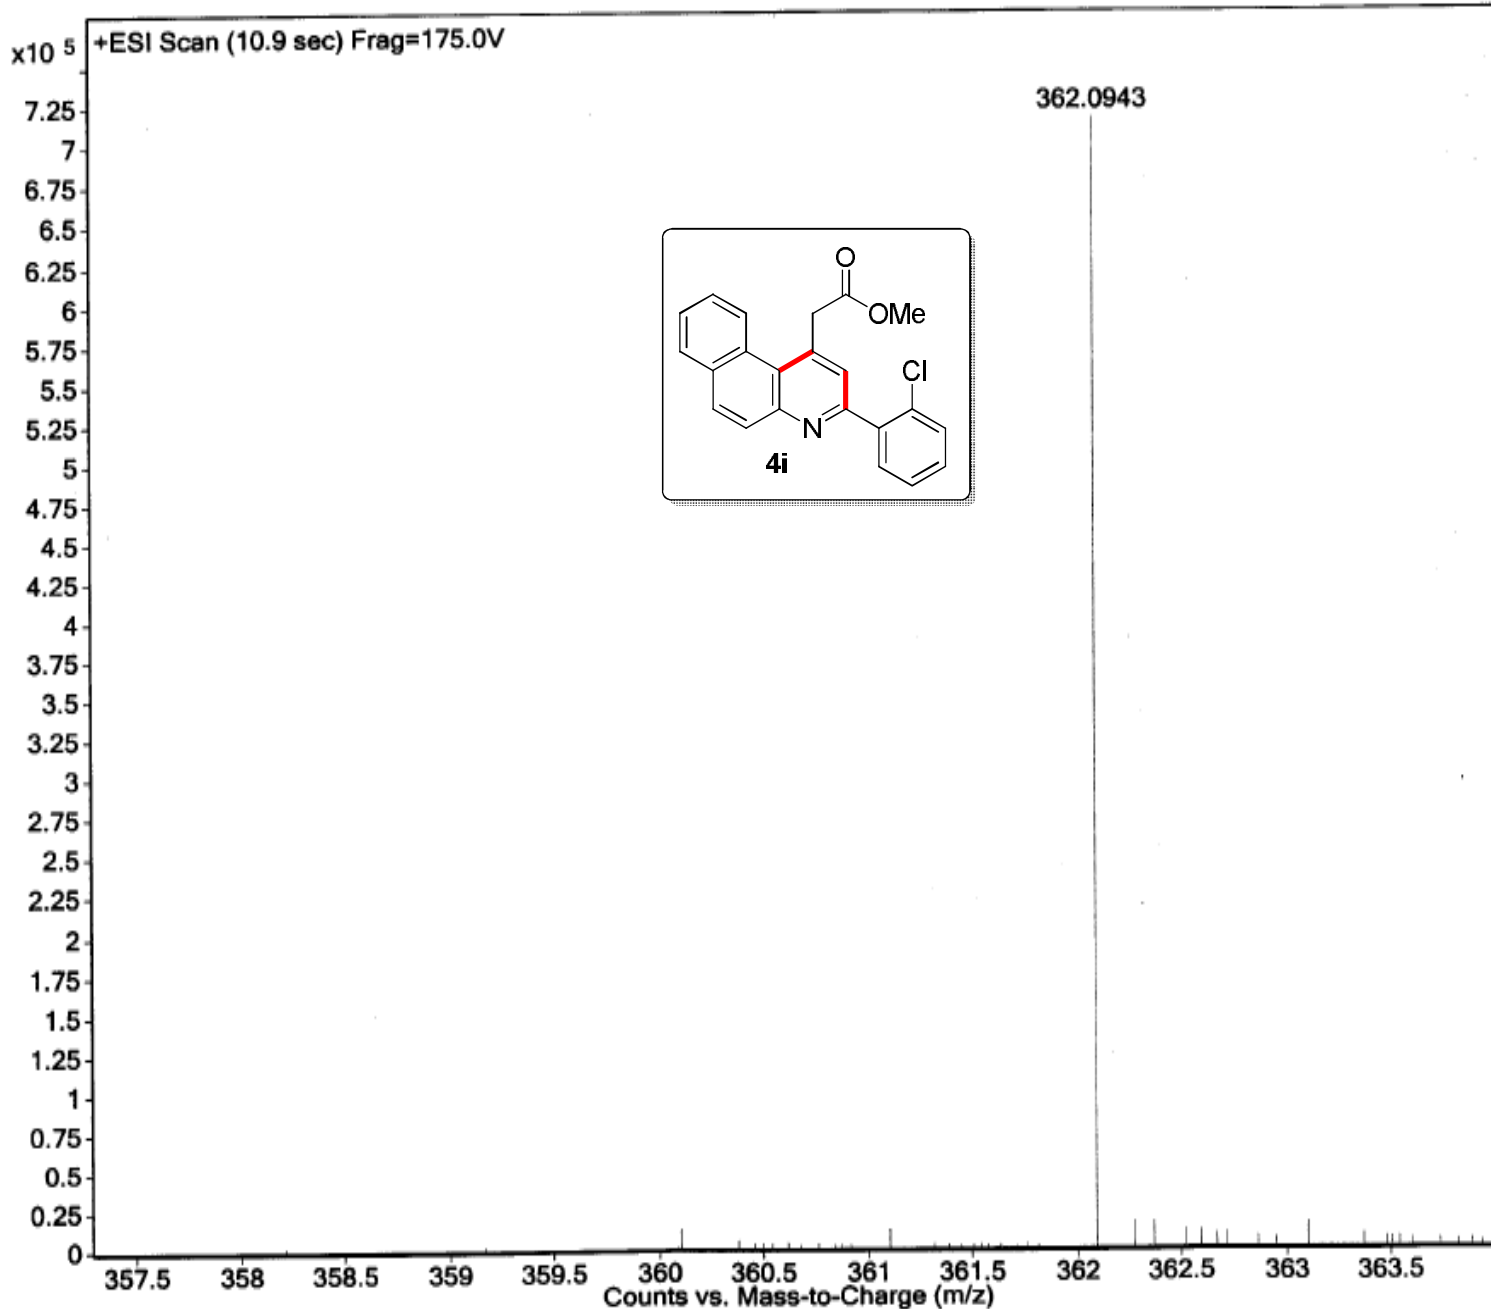

*<sup>1</sup>H NMR spectra of compound 4j*

RK-3BR-OME-N2-1H-2  
RK-3BR-OME-N2-1H-2

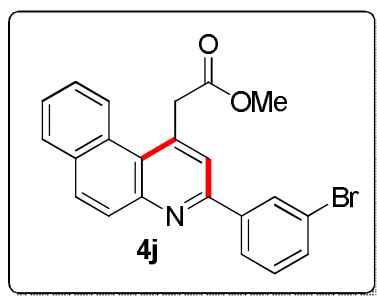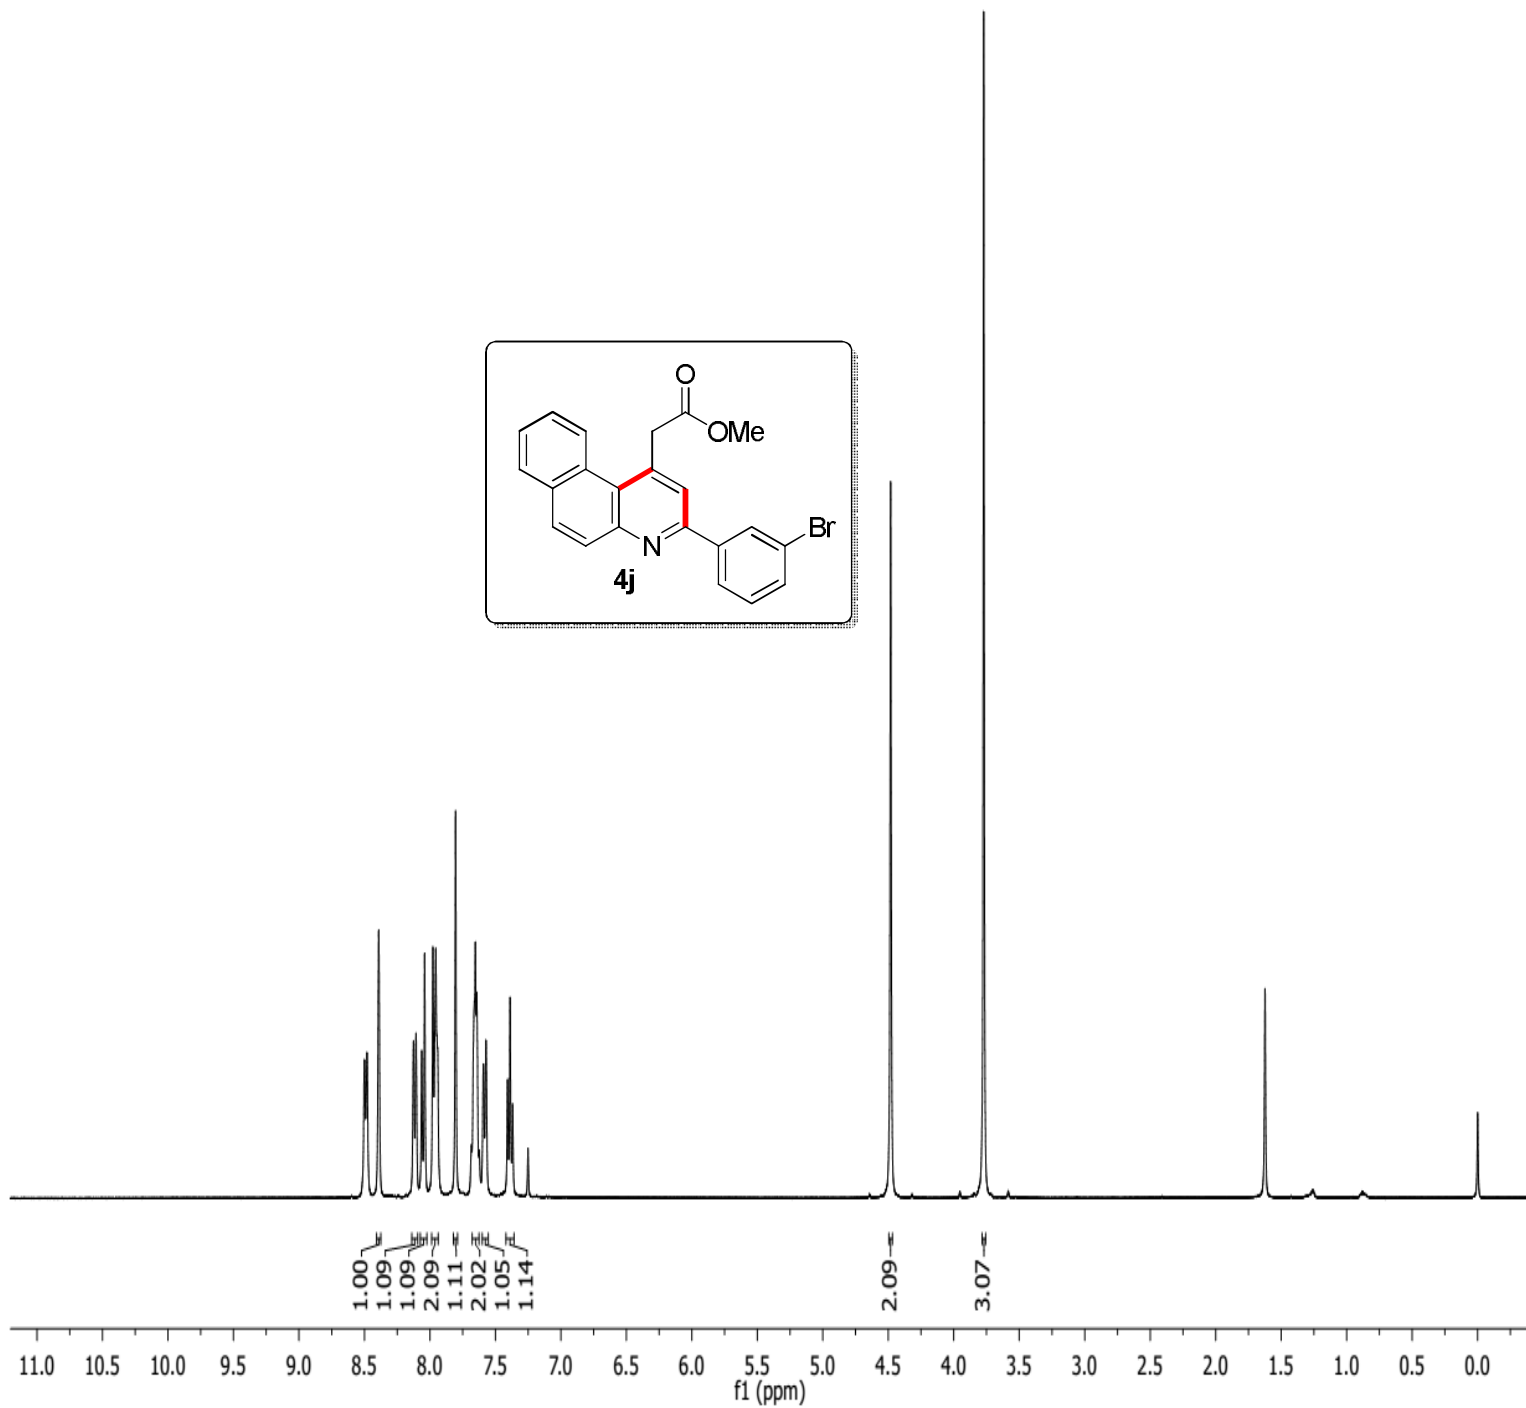

*<sup>13</sup>C NMR spectra of compound 4j*

RK-3BR-OME-N2-13C  
RK-3BR-OME-N2-13C  
—171.14

—154.08  
—150.28

141.13  
141.07  
133.27  
132.42  
131.76  
130.63  
130.52  
129.79  
129.62  
129.49  
127.14  
126.95  
126.85  
126.10  
124.90  
123.35  
122.98

77.55  
77.23  
76.91

—52.86

—43.67

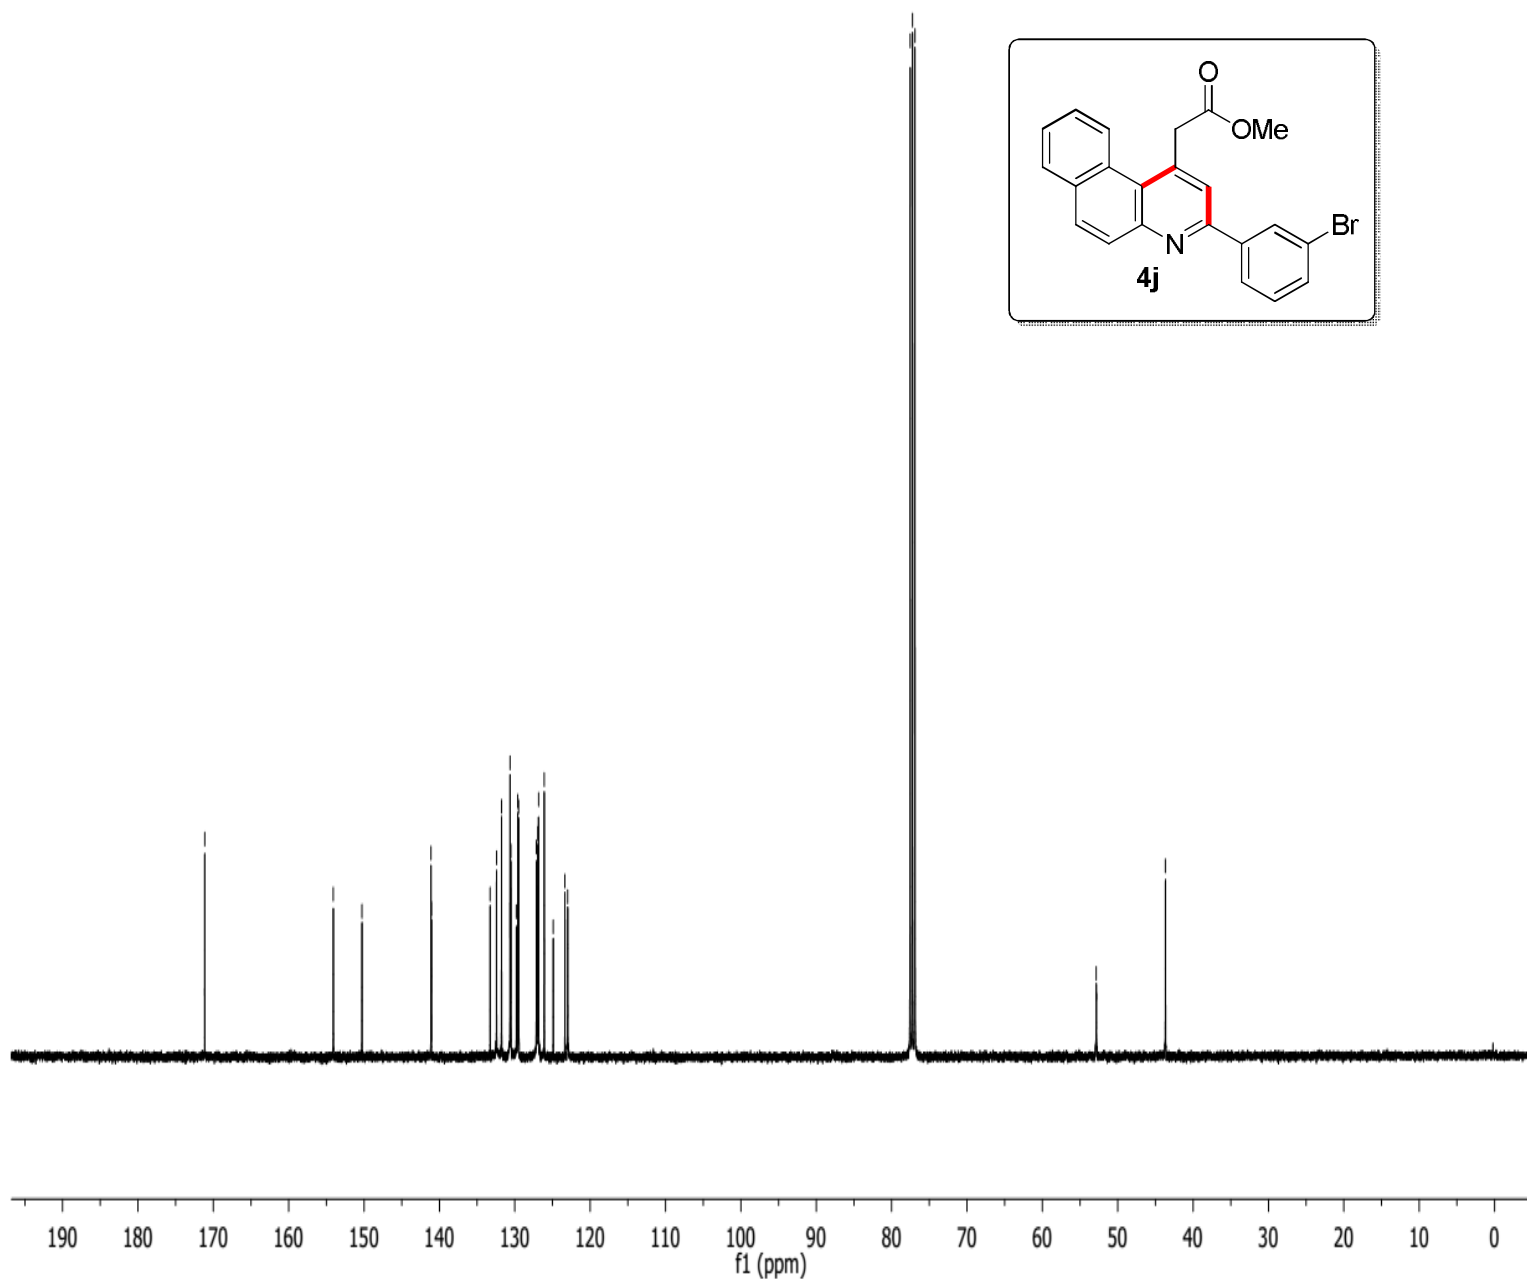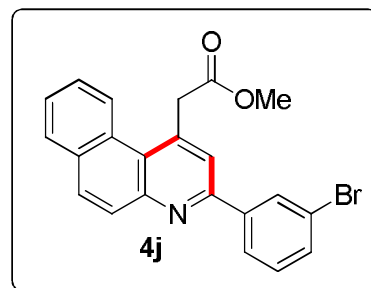

HRMS spectra of compound 4j

|               |              |             |        |                 |              |                        |                      |
|---------------|--------------|-------------|--------|-----------------|--------------|------------------------|----------------------|
| Sample Name   | RK-3BR-OME   | Position    | Vial 1 | Instrument Name | Instrument 1 | User Name              |                      |
| Inj Vol       | 0            | InjPosition |        | SampleType      | Sample       | IRM Calibration Status | All Ions Missed      |
| Data Filename | RK-3BR-OME.d | ACQ Method  |        | Comment         |              | Acquired Time          | 12/4/2015 5:16:34 PM |

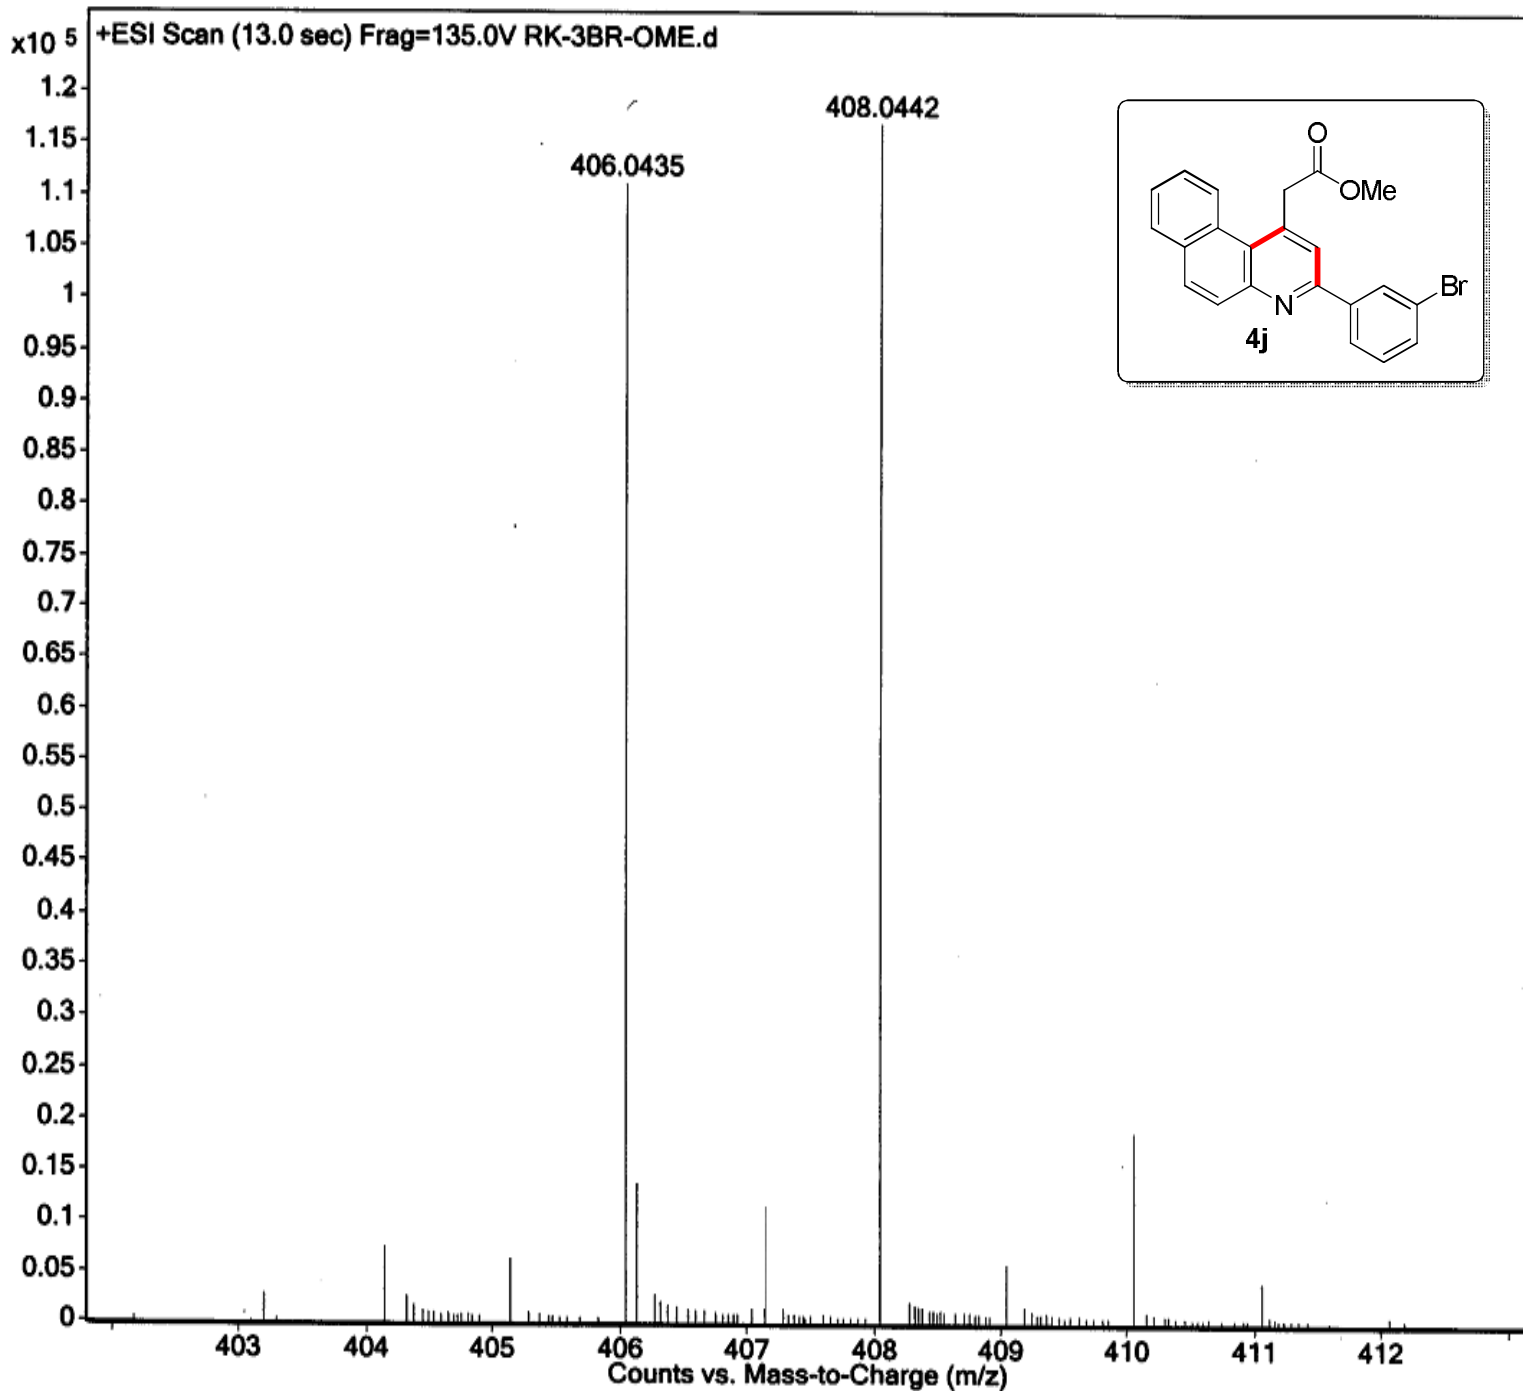



# *<sup>1</sup>H NMR spectra of compound 4k*

Sample Name:  
RK-OMe-C14  
Data Collected on:  
IITG-NMR-mercury400  
Archive directory:  
/home/chem/data/study  
Sample directory:  
DS-309-DEPT-01  
FidFile: RK-OMe-C14

Pulse Sequence: PROTON (s2pul)  
Solvent: cdcl3  
Data collected on: May 30 2014

Temp. 25.0 C / 298.1 K  
Operator: chem

Relax. delay 1.000 sec  
Pulse 45.0 degrees  
Acq. time 2.561 sec  
Width 6398.0 Hz  
32 repetitions  
OBSERVE H1, 399.8509610 MHz  
DATA PROCESSING  
FT size 32768  
Total time 2 min 12 sec

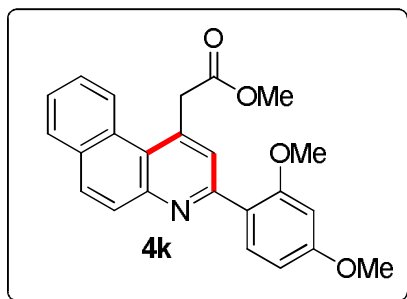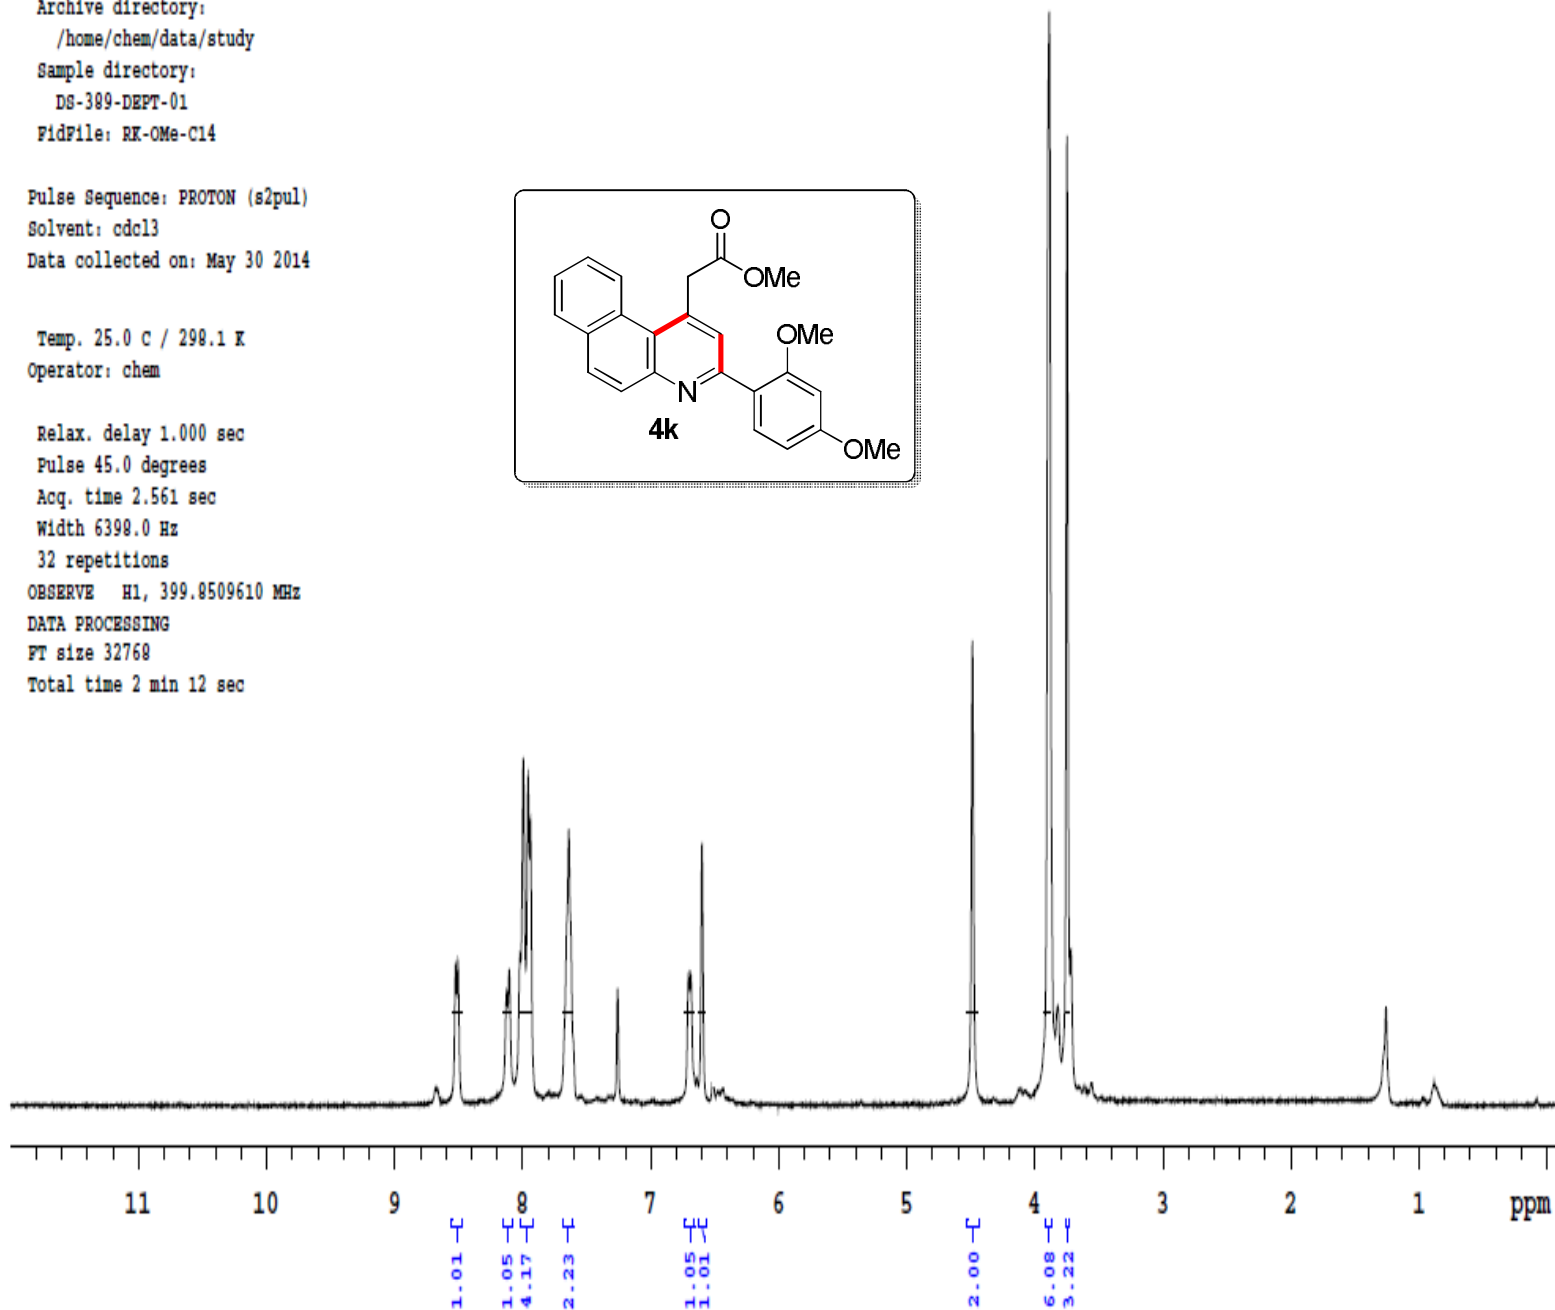

*<sup>13</sup>C NMR spectra of compound 4k*

RK-OMe-C14-13C  
RK-OMe-C14-13C

— 177.34  
— 162.13  
— 158.79  
— 154.64  
— 149.68  
— 139.83  
— 133.04  
— 132.74  
— 131.20  
— 128.95  
— 128.38  
— 127.25  
— 126.71  
— 123.91  
— 105.70  
— 99.23  
77.55  
77.33  
76.91  
55.94  
55.70  
52.96  
— 43.76

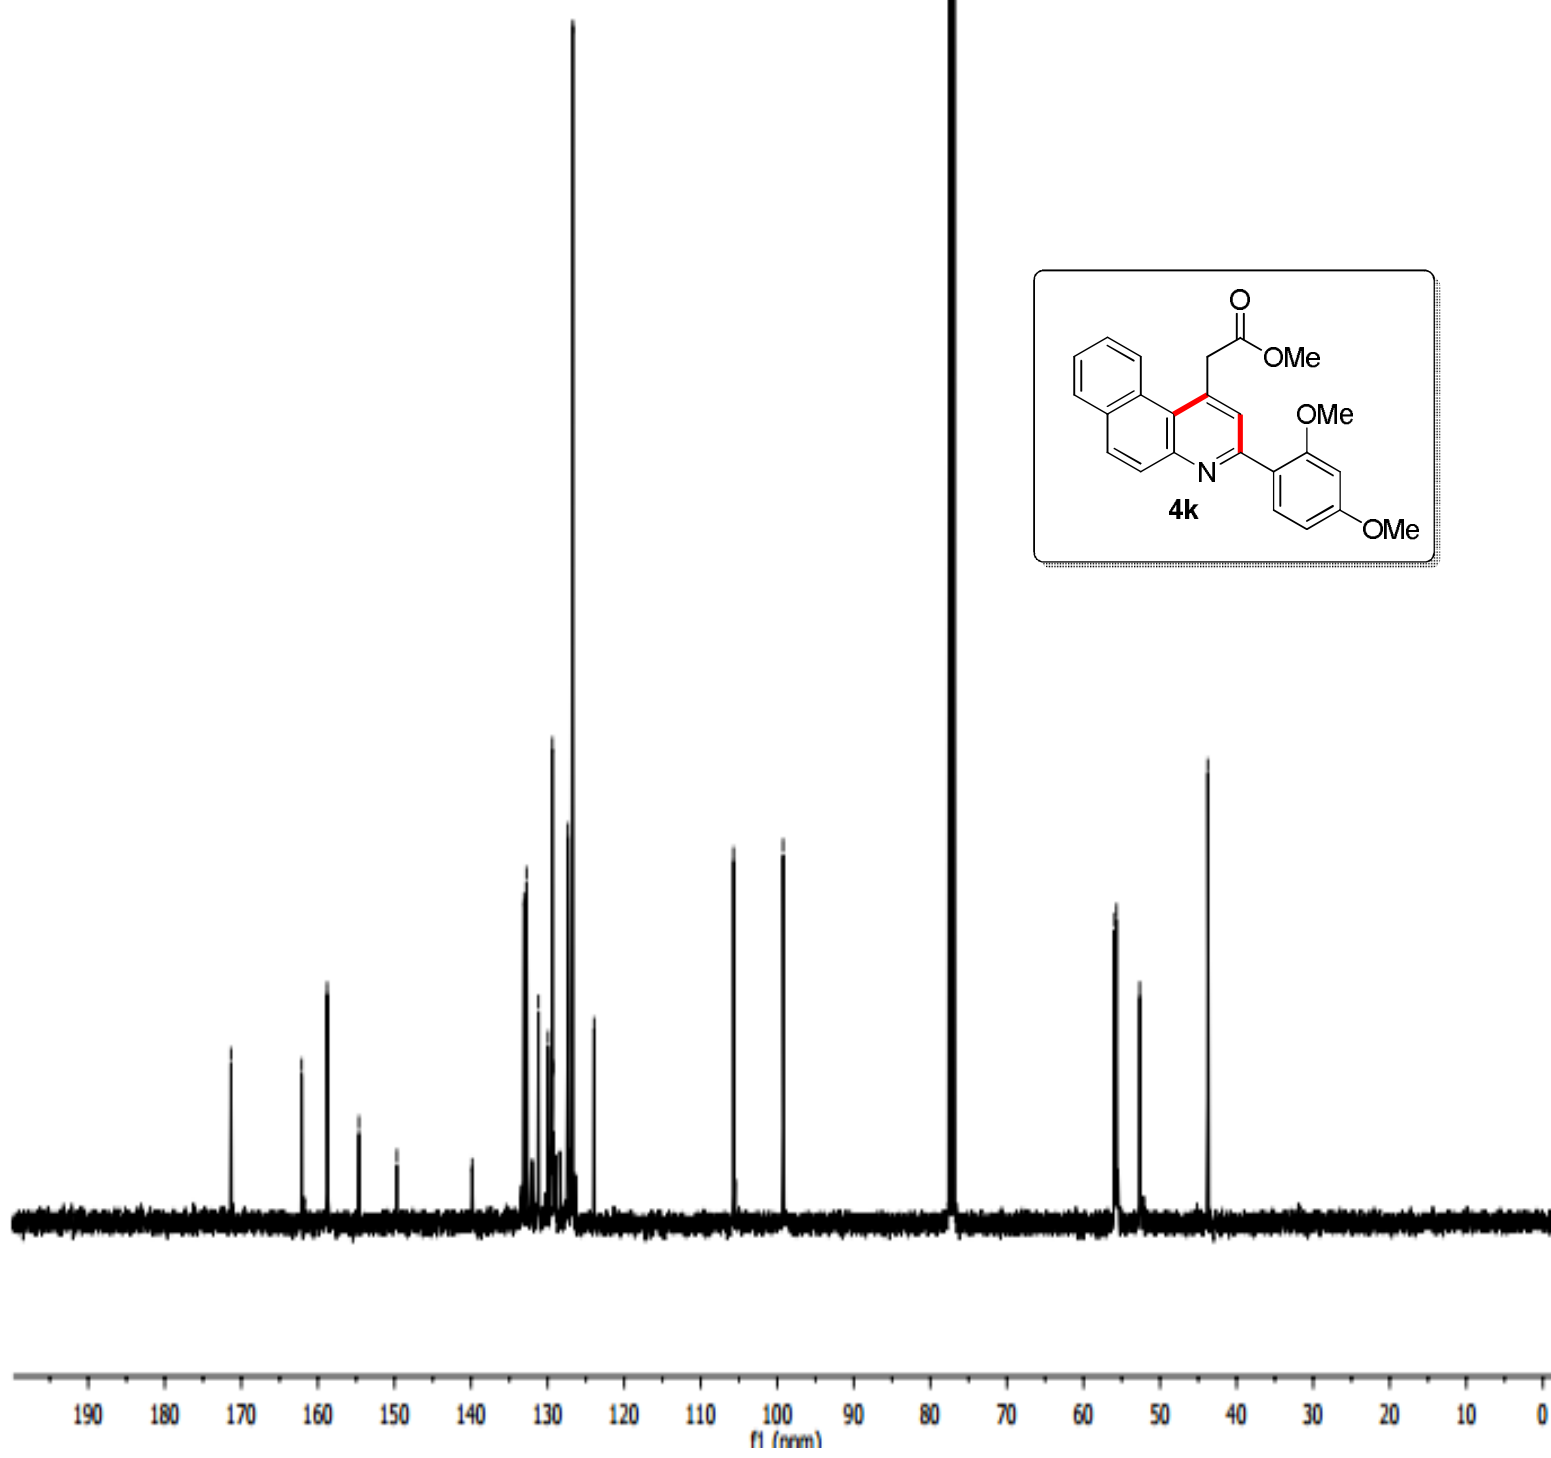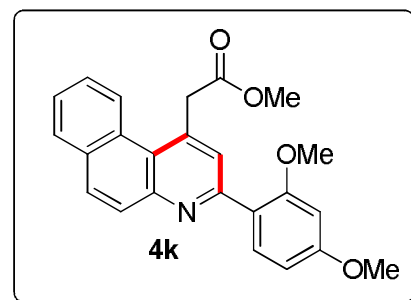

HRMS spectra of compound 4k

|               |              |             |        |                 |              |                        |                      |
|---------------|--------------|-------------|--------|-----------------|--------------|------------------------|----------------------|
| Sample Name   | RK-2-3-OME   | Position    | Vial 1 | Instrument Name | Instrument 1 | User Name              |                      |
| Inj Vol       | -10          | InjPosition |        | SampleType      | Sample       | IRM Calibration Status | Success              |
| Data Filename | RK-2-3-OME.d | ACQ Method  |        | Comment         |              | Acquired Time          | 12/9/2014 4:05:57 PM |

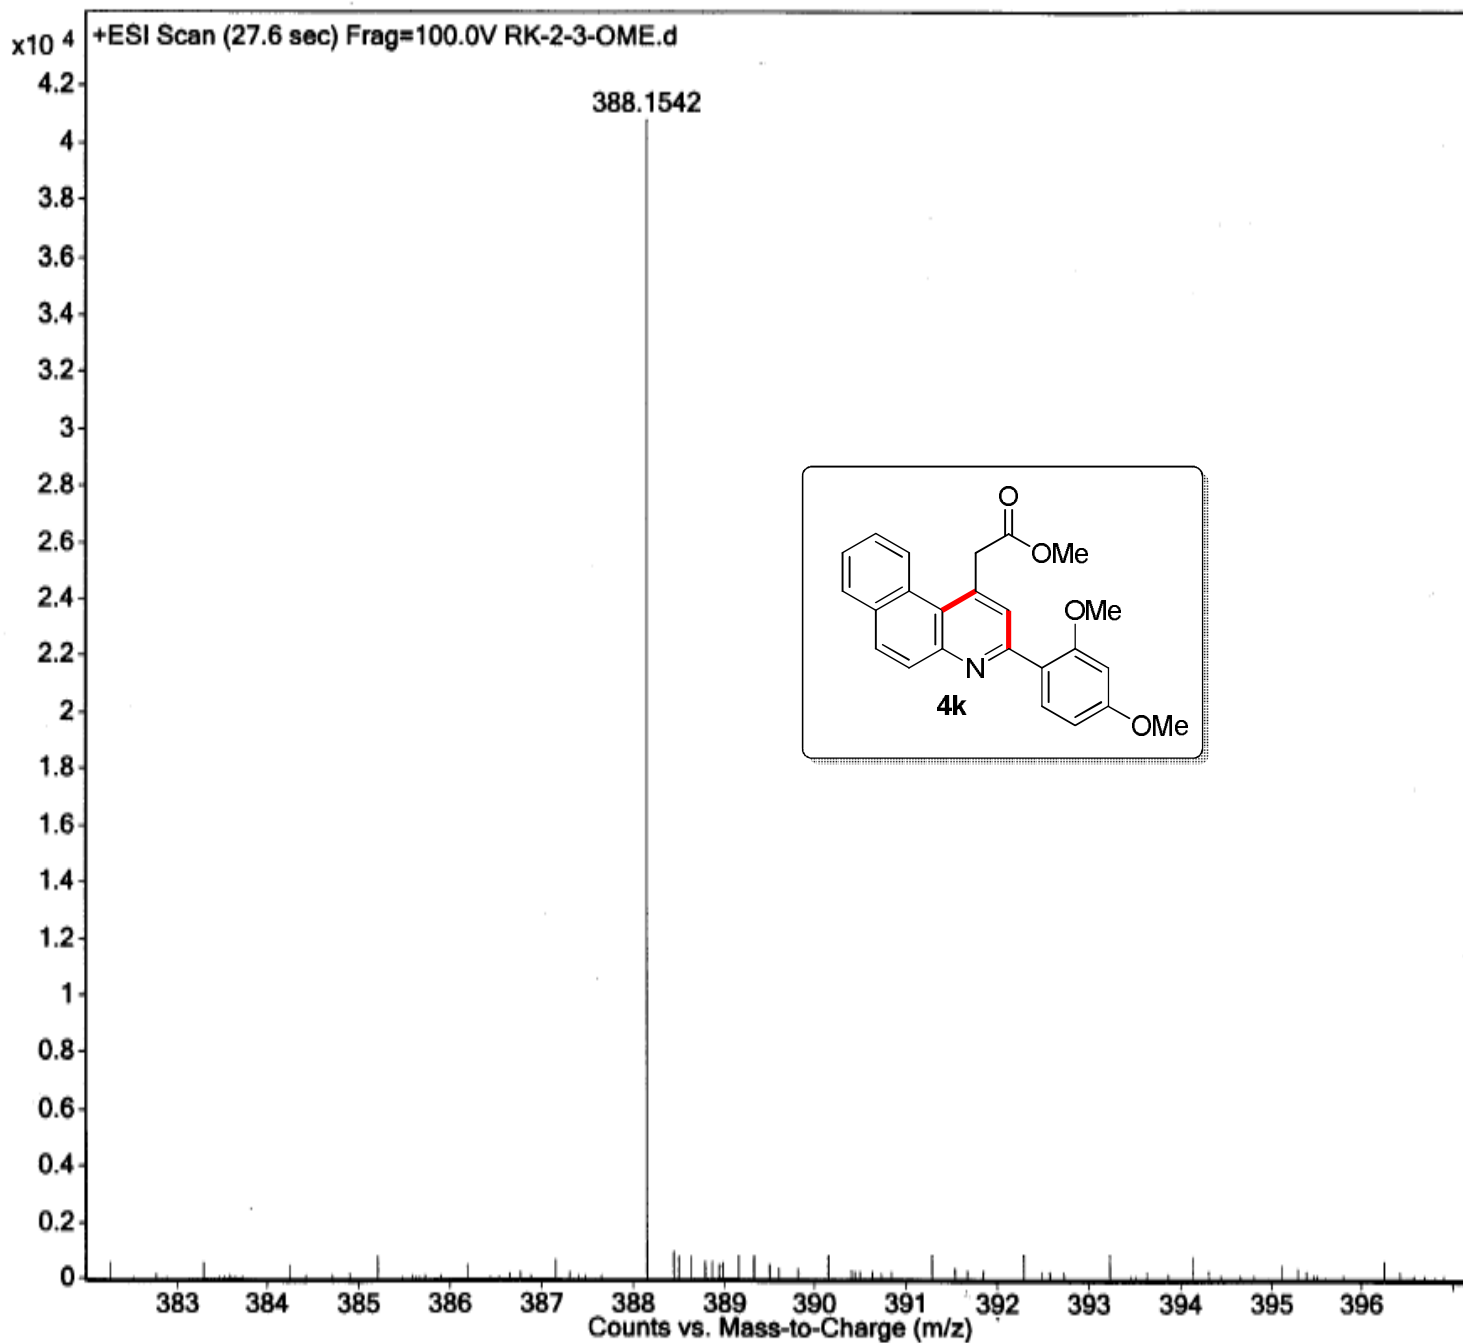

*<sup>1</sup>H NMR spectra of compound 4l*

RK-NAP-SAL-OALL-1A-1H

Sample Name:

RK-NAP-SAL-OALL-1A-1H

Data Collected on:

IITG-NMR-mercury400

Archive directory:

Sample directory:

FidFile: PROTON

Pulse Sequence: PROTON (s2pul)

Solvent: cdcl3

Data collected on: Dec 20 2014

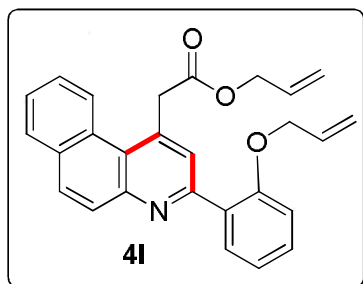

Temp. 25.0 C / 298.1 K

Operator: chem

Relax. delay 1.000 sec

Pulse 45.0 degrees

Acq. time 2.561 sec

Width 6398.0 Hz

32 repetitions

OBSERVE H1, 399.8509633 MHz

DATA PROCESSING

FT size 32768

Total time 2 min 12 sec

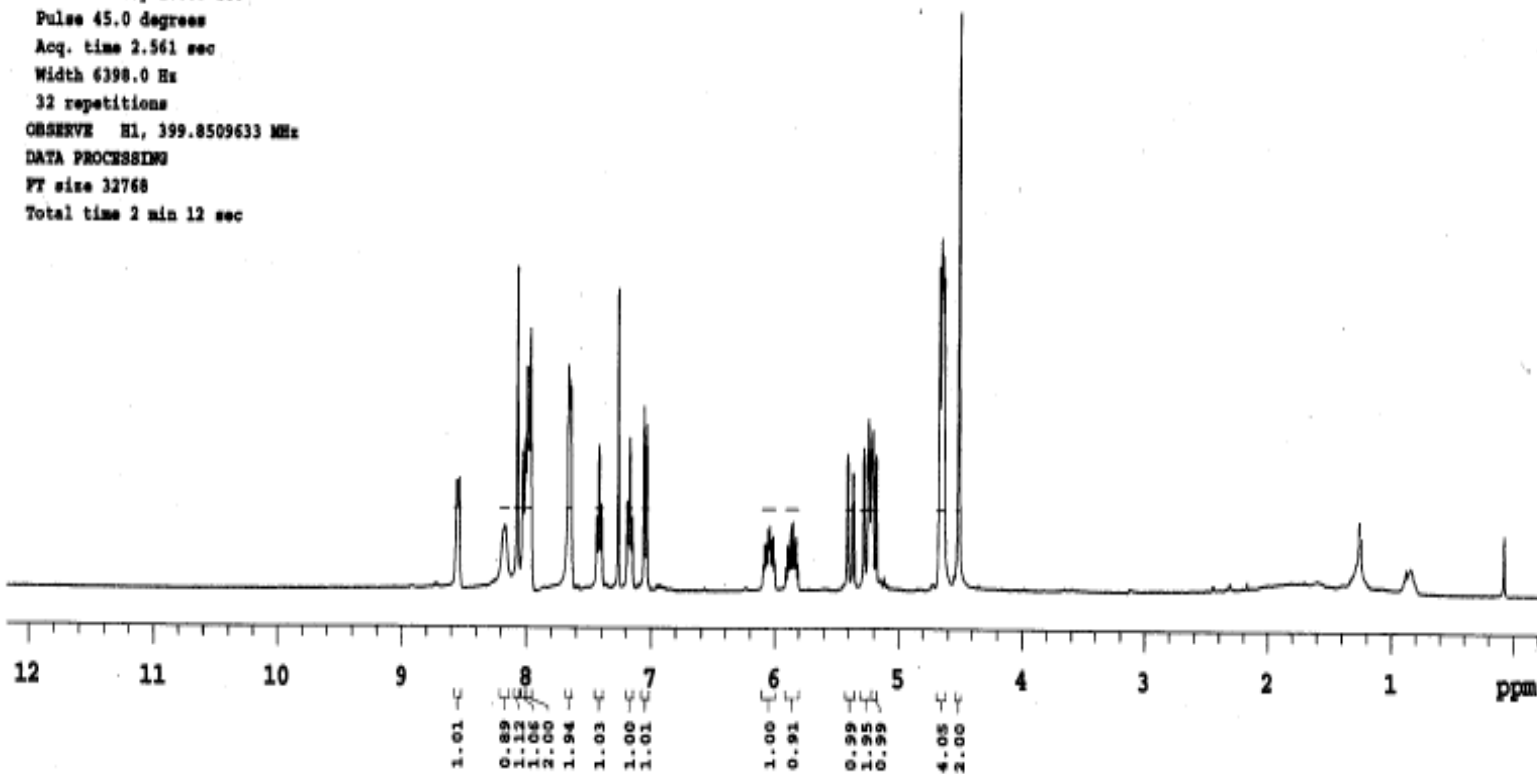

*<sup>13</sup>C NMR spectra of compound 4I*

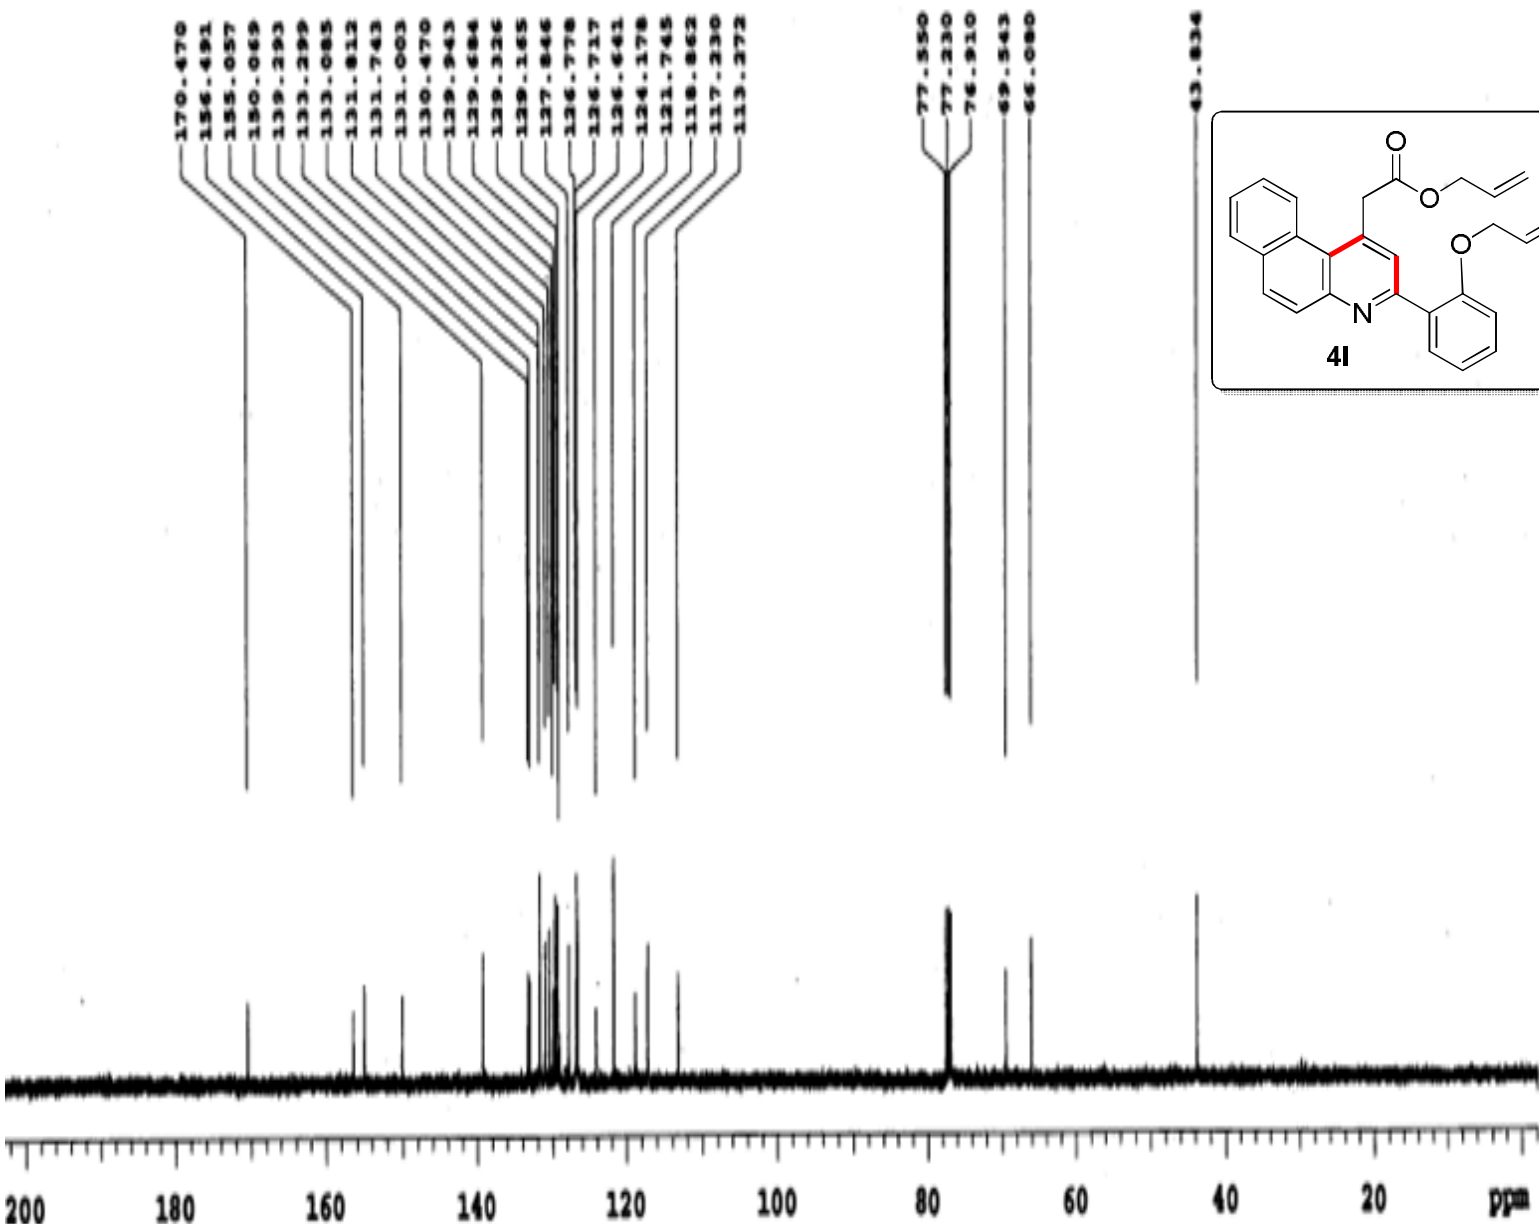

|                                                                                                                                     |                                                                                                                            |                                                                                           |                                                                                      |
|-------------------------------------------------------------------------------------------------------------------------------------|----------------------------------------------------------------------------------------------------------------------------|-------------------------------------------------------------------------------------------|--------------------------------------------------------------------------------------|
| <b>PULSE SEQUENCE</b><br>Relax. delay 1.000 sec<br>Pulse 45.0 degrees<br>Acq. time 1.304 sec<br>Width 25125.6 Hz<br>130 repetitions | <b>OBSERVE</b> C13, 100.5425932<br><b>DECOUPLE</b> H1, 399.8529994<br>Power 42 dB<br>continuously on<br>WALTZ-16 modulated | <b>DATA PROCESSING</b><br>Line broadening 0.5 Hz<br>FT size 65536<br>Total time 5 minutes | EK-MAP-SAL-CALL-3-13C                                                                |
|                                                                                                                                     |                                                                                                                            |                                                                                           | Solvent: cdcl3<br>Temp. 25.0 C / 298.1 K<br>Operator: chem<br>Mercury-400 *IITG-NMR* |

### HRMS spectra of compound 4l

|               |                     |             |        |                 |              |                        |                       |
|---------------|---------------------|-------------|--------|-----------------|--------------|------------------------|-----------------------|
| Sample Name   | RK-NAP-SAL-OALL-1   | Position    | Vial 1 | Instrument Name | Instrument 1 | User Name              |                       |
| Inj Vol       | -10                 | InjPosition |        | SampleType      | Sample       | IRM Calibration Status | Success               |
| Data Filename | RK-NAP-SAL-OALL-1.d | ACQ Method  |        | Comment         |              | Acquired Time          | 12/31/2014 3:25:38 PM |

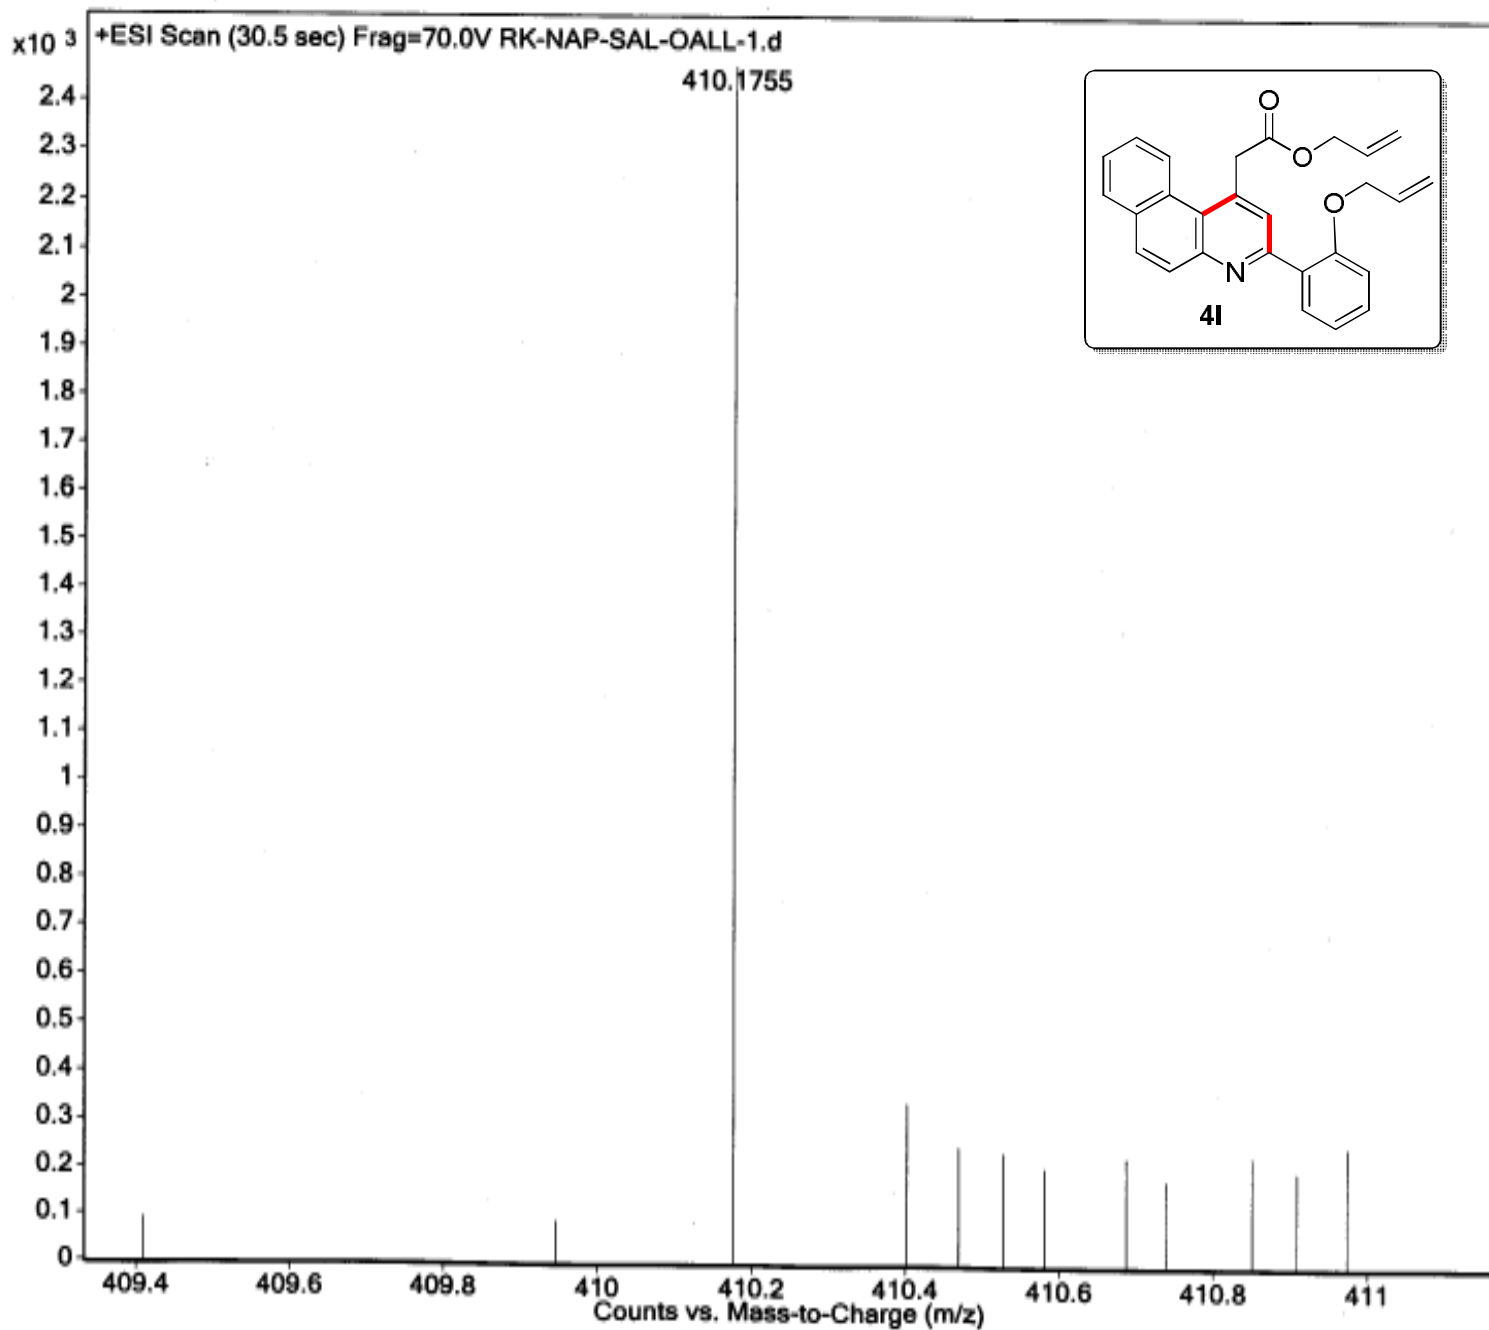

*<sup>1</sup>H NMR spectra of compound 4m*

RK-30H-N2

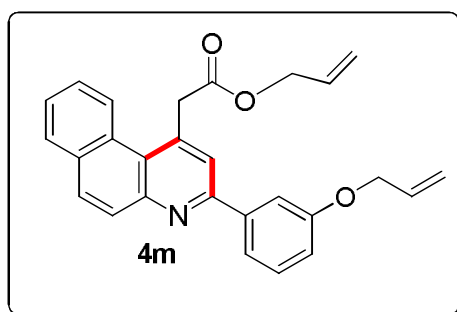

Current Data Parameters  
Date: 08-08-02  
Time: 1  
Pulse: 1

F1 - Acquisition Parameters  
Date\_: 08/08/02  
Time: 11.58  
Instrum: spect  
PROBHD: 5 mm HBBB QNP  
PULPROG: zgpg30  
TD: 65536  
SOLVENT: CDCl3  
NS: 18  
DS: 2  
SWH: 12000.200 Hz  
FIDRES: 0.340700 Hz  
AQ: 1.1411400 sec  
RG: 48.00  
SN: 61.400 sec  
IN: 4.00 sec  
TE: 297.2 K  
D1: 1.0000000 sec  
TAD: 1

===== CHANNEL F1 =====  
NUC1: 13C-125MHz  
PULP1: 18  
PC1: 15.00 sec  
PL1: 0.0000000 Hz

F1 - Processing parameters  
SI: 32768  
SF: 600.1370000 MHz  
WDW: EM  
SSB: 0  
LB: 0.20 Hz  
GB: 0  
PC: 1.00

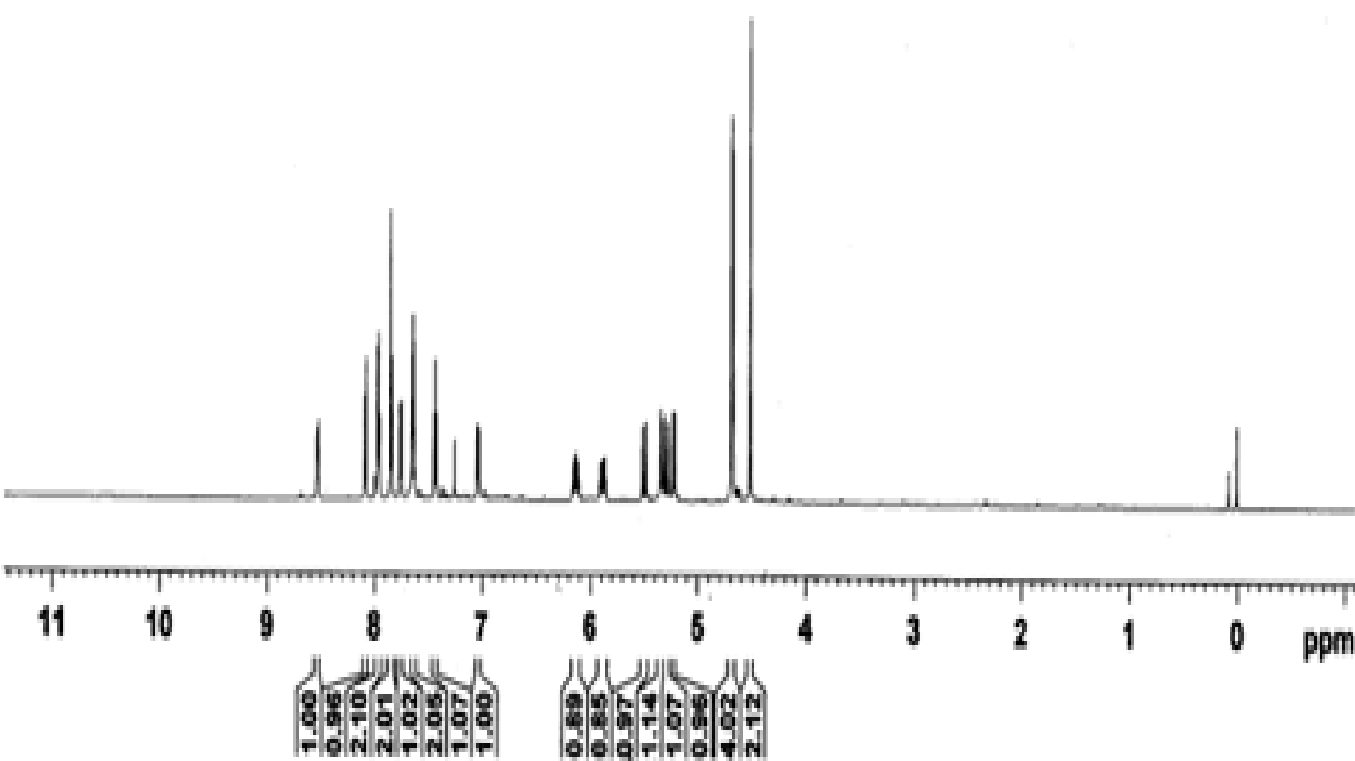

<sup>13</sup>C NMR spectra of compound 4m

RK-30H-N2\_13C

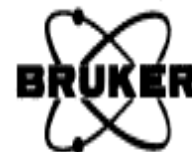

170.42  
159.38  
155.56  
150.21  
140.85  
140.50  
133.51  
132.21  
131.81  
131.51  
130.03  
129.92  
129.74  
129.43  
129.95  
126.88  
126.84  
124.58  
123.29  
120.22  
119.12  
117.97  
116.25  
113.77

77.44  
77.22  
77.02  
68.17  
66.25

43.64

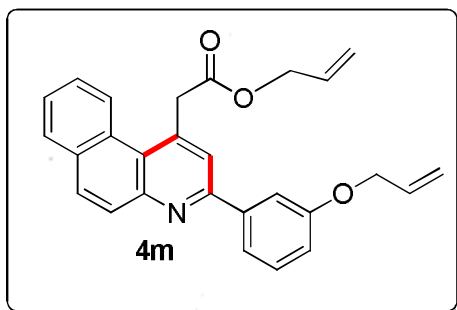

Current Data Parameters  
NAME RK-30H-N2\_13C  
EXPNO 1  
PROCNO 1

F2 - Acquisition Parameters  
Date\_ 20150226  
Time 16.30  
INSTRUM spect  
PROBHD 5 mm PABBO BB/  
PULPROG zgpg30  
TD 32768  
SOLVENT CDCl3  
NS 182  
DS 2  
SWH 36057.691 Hz  
FIDRES 1.100393 Hz  
AQ 0.4543829 sec  
RG 65.24  
DM 13.867 usec  
DE 6.50 usec  
TE 298.1 K  
D1 2.00000000 sec  
D11 0.03000000 sec  
TDO 1

----- CHANNEL f1 -----  
SFO1 150.9279571 MHz  
NUC1 13C  
P1 10.50 usec  
PLW1 95.00000000 W

----- CHANNEL f2 -----  
SFO2 600.1724007 MHz  
NUC2 1H  
CPDPRG[2] waltz16  
PCPD2 70.00 usec  
PLW2 21.00000000 W  
PLW12 0.61714000 W  
PLW13 0.30239999 W

F2 - Processing parameters  
SI 16384  
SF 150.9128380 MHz  
WDW EM  
SSB 0  
LB 1.00 Hz  
GB 0  
PC 1.40

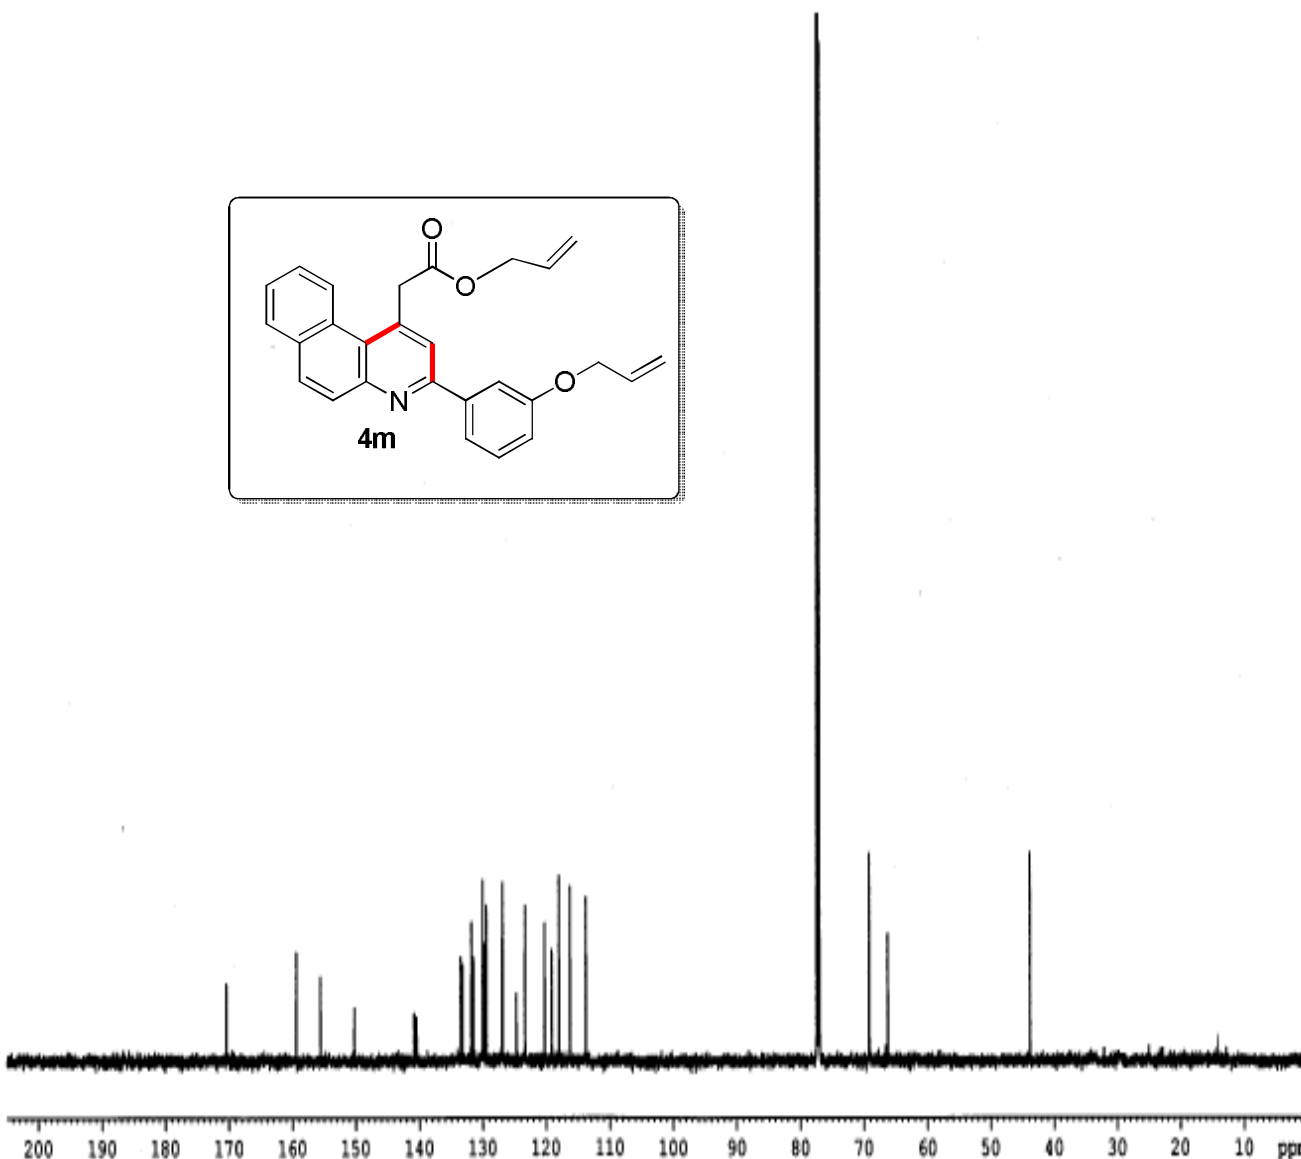



HRMS spectra of compound 4m

| Sample Name   | Position    | Instrument Name | User Name              |
|---------------|-------------|-----------------|------------------------|
| Inj Vol       | InjPosition | SampleType      | IRM Calibration Status |
| Data Filename | ACQ Method  | Comment         | Acquired Time          |

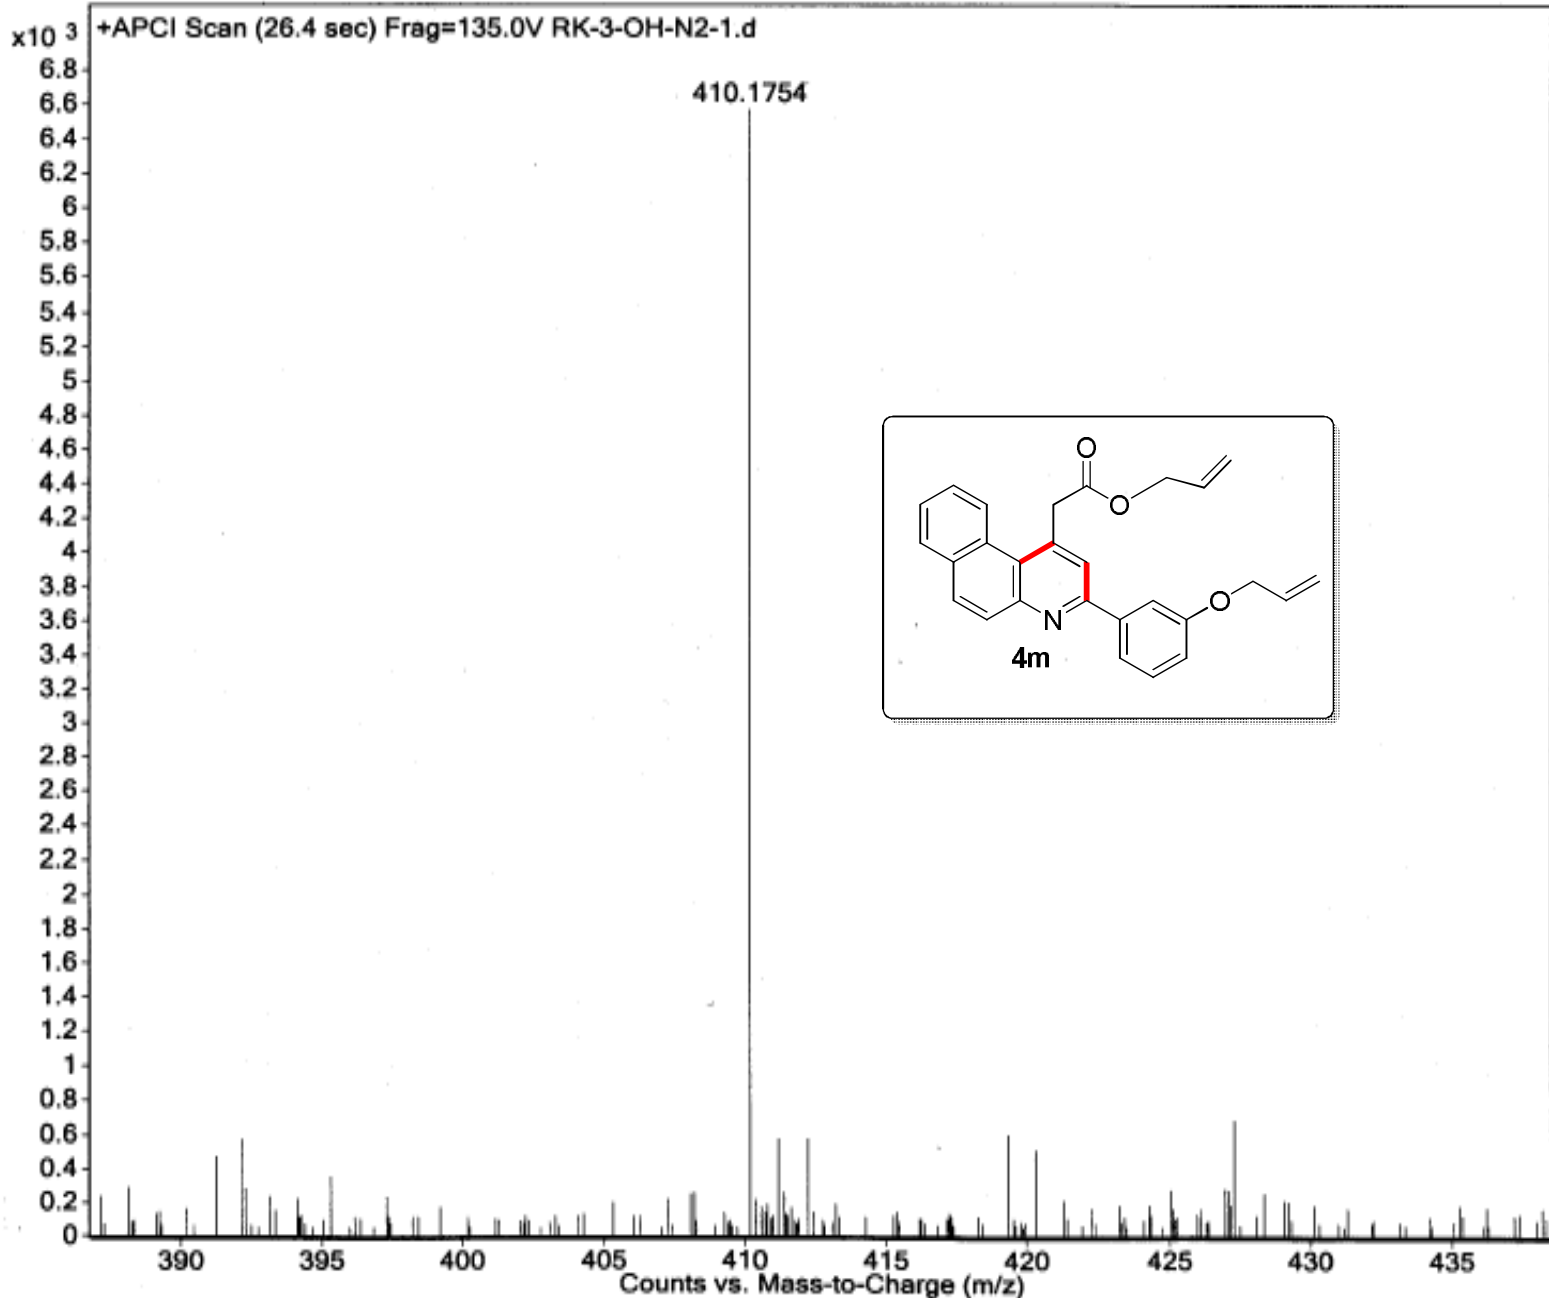

# *<sup>1</sup>H NMR spectra of compound 4n*

RK-ME-OBT-1H

Sample Name:

RK-ME-OBT-1H

Data Collected on:

IITG-NMR-mercury400

Archive directory:

/home/chem/data/study

Sample directory:

LR-Karanjin\_COBY-2-01

Fidfile: RK-ME-OBT-1H

Pulse Sequence: PROTON (s2pul)

Solvent: cdcl3

Data collected on: Sep 16 2014

Temp. 25.0 C / 298.1 K

Operator: chem

Relax. delay 1.000 sec

Pulse 45.0 degrees

Acq. time 2.561 sec

Width 6398.0 Hz

32 repetitions

OBSERVE H1, 399.8509634 MHz

DATA PROCESSING

FT size 32768

Total time 2 min 12 sec

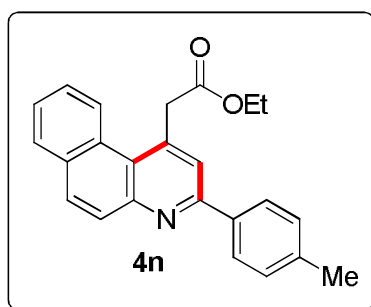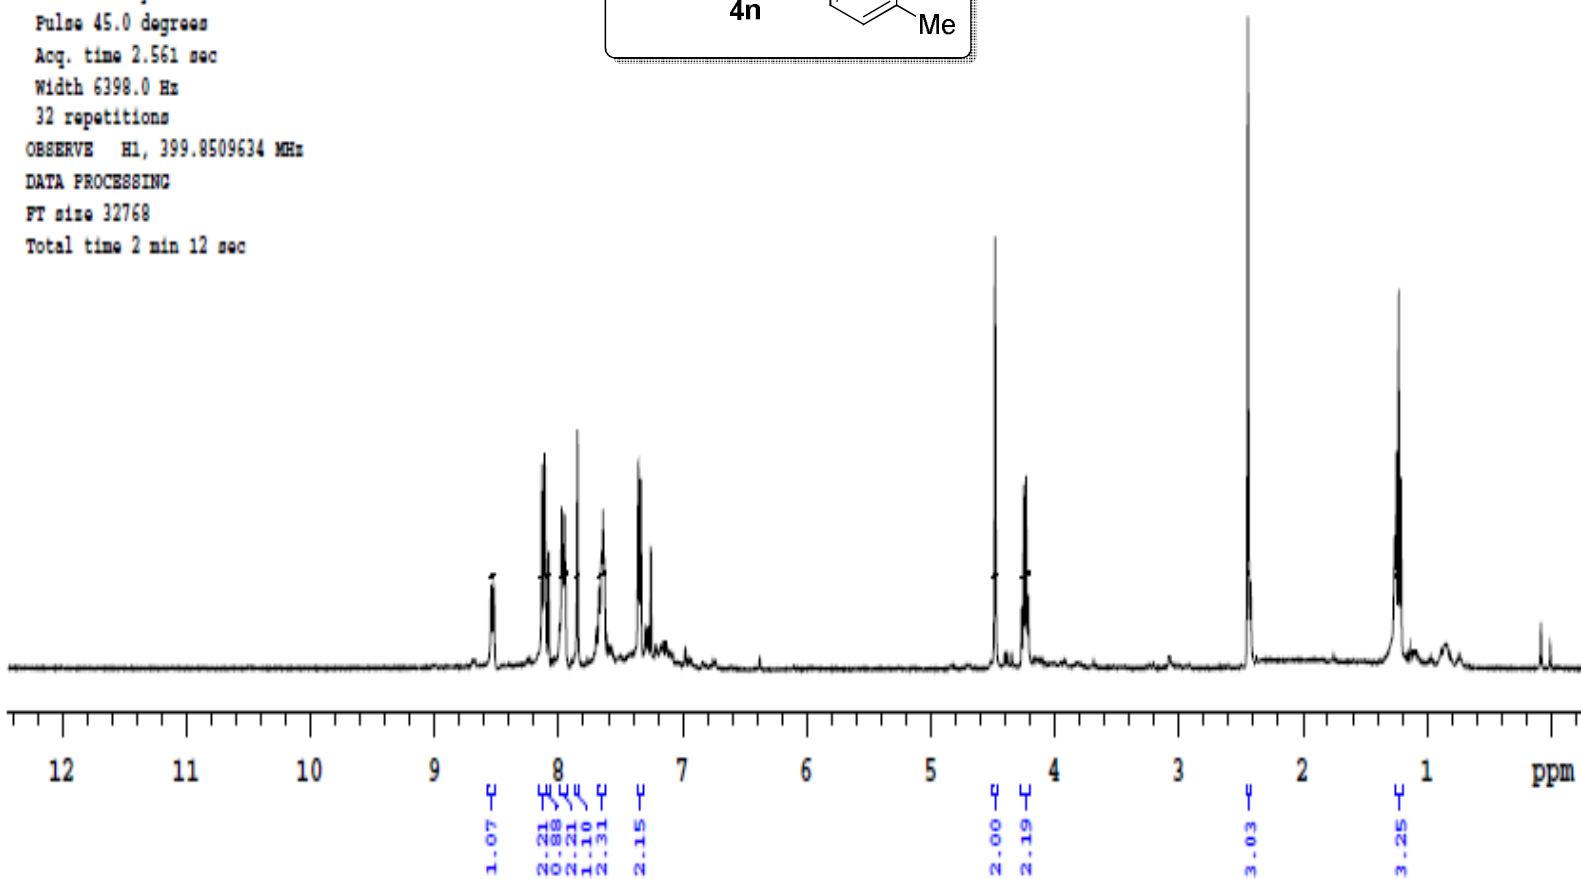

*<sup>13</sup>C NMR spectra of compound 4n*

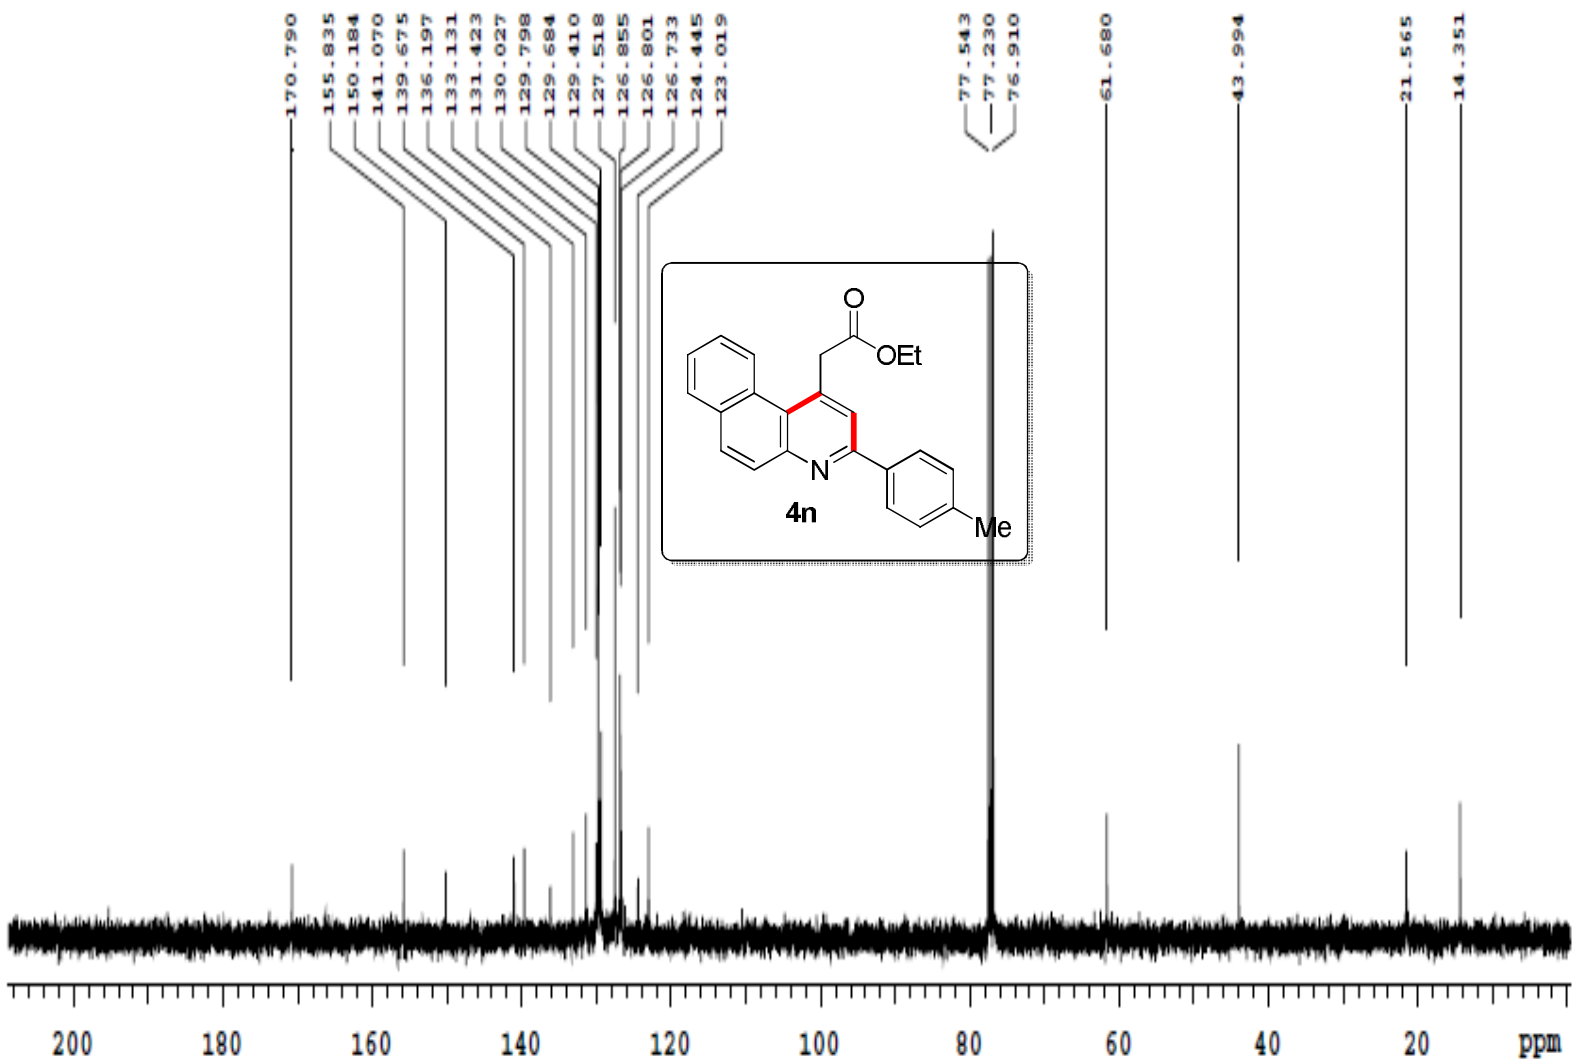

|                                                                                                                                     |                                                                                                                            |                                                                                            |                                                                                                                                     |
|-------------------------------------------------------------------------------------------------------------------------------------|----------------------------------------------------------------------------------------------------------------------------|--------------------------------------------------------------------------------------------|-------------------------------------------------------------------------------------------------------------------------------------|
| <b>PULSE SEQUENCE</b><br>Relax. delay 1.000 sec<br>Pulse 45.0 degrees<br>Acq. time 1.304 sec<br>Width 25125.6 Hz<br>780 repetitions | <b>OBSERVE</b> C13, 100.5425832<br><b>DECOUPLE</b> H1, 399.8529994<br>Power 42 dB<br>continuously on<br>WALTZ-16 modulated | <b>DATA PROCESSING</b><br>Line broadening 0.5 Hz<br>FT size 65536<br>Total time 29 minutes | <b>RK-ME-OBT-13C</b><br>Solvent: cdcl3<br>Temp. 25.0 C / 298.1 K<br>Operator: chem<br>File: RK-ME-OBT-13C<br>Mercury-400 *IITG-NMR* |
|-------------------------------------------------------------------------------------------------------------------------------------|----------------------------------------------------------------------------------------------------------------------------|--------------------------------------------------------------------------------------------|-------------------------------------------------------------------------------------------------------------------------------------|

HRMS spectra of compound 4n

| Sample Name   | Position    | Instrument Name | User Name              |
|---------------|-------------|-----------------|------------------------|
| Inj Vol       | InjPosition | SampleType      | IRM Calibration Status |
| Data Filename | ACQ Method  | Comment         | Acquired Time          |

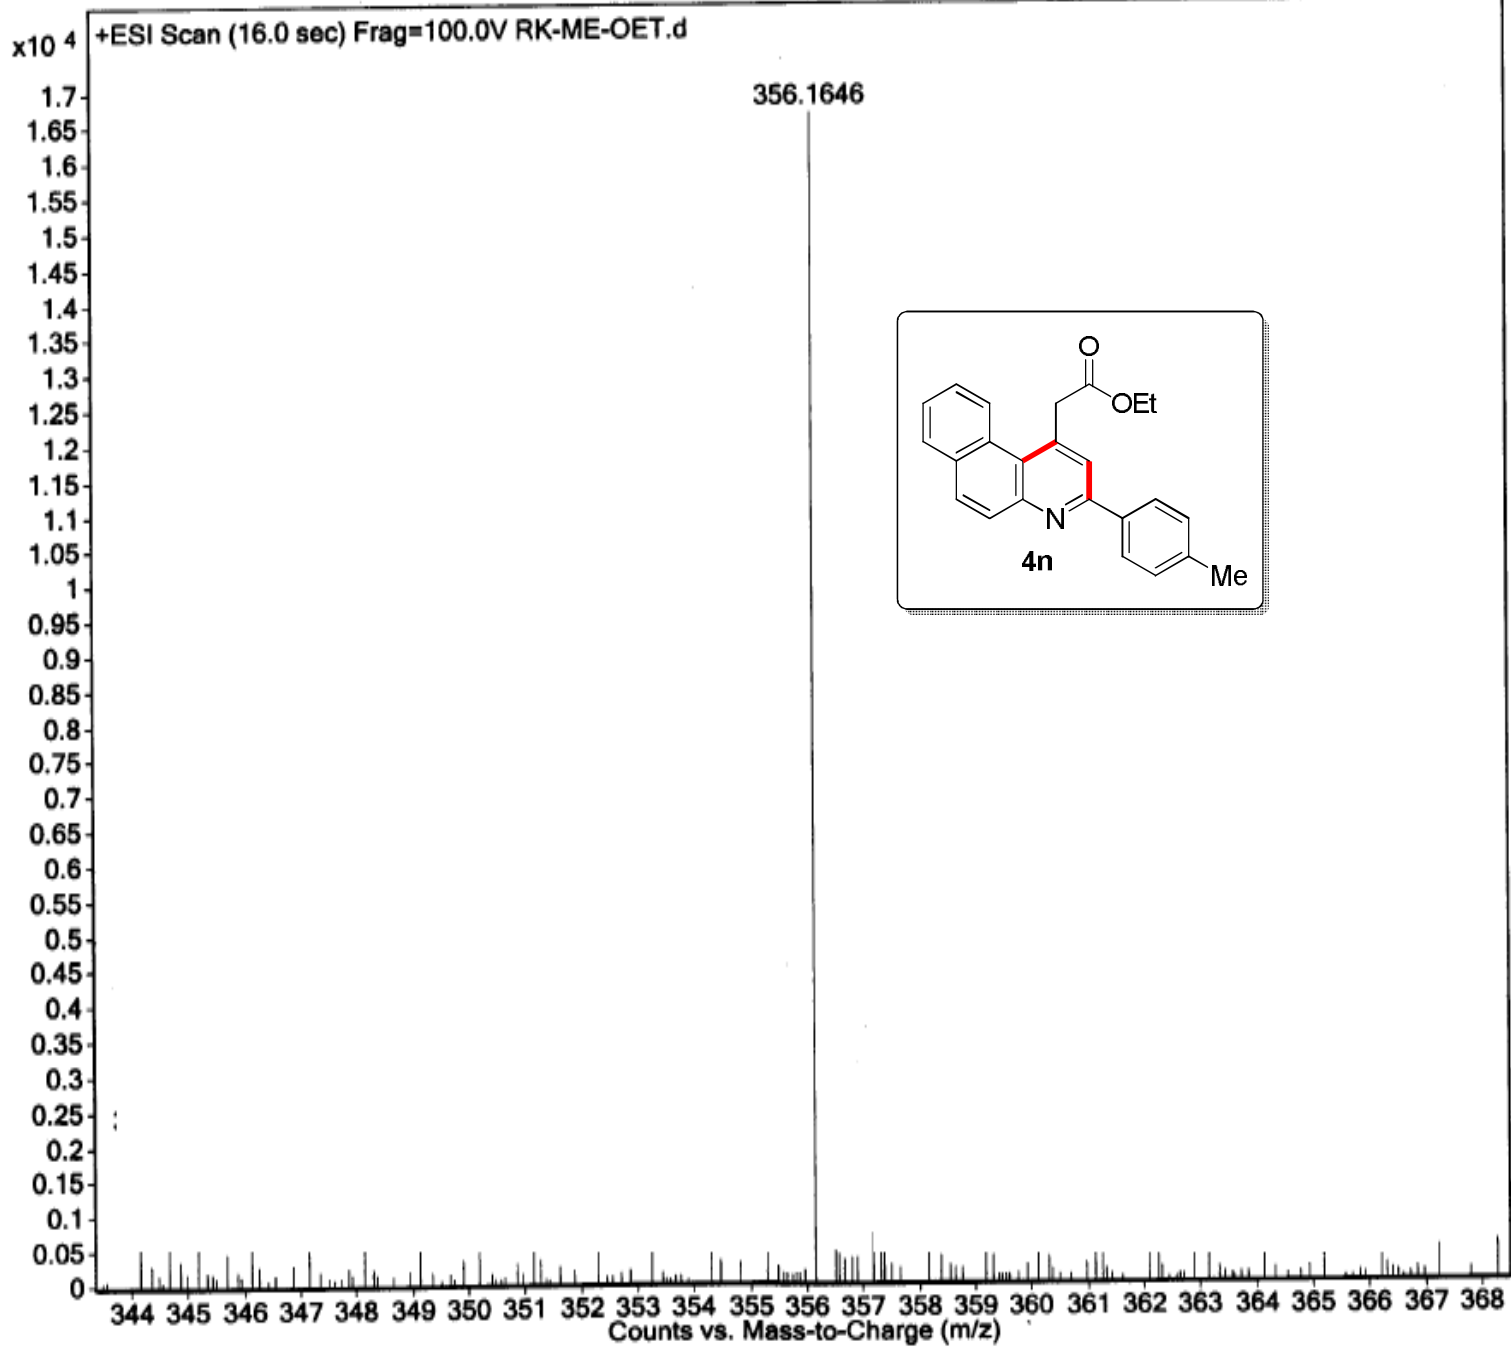

*<sup>1</sup>H NMR spectra of compound 4o*

RK-N2-OMe-OEt-1H  
RK-N2-OMe-OEt-1H

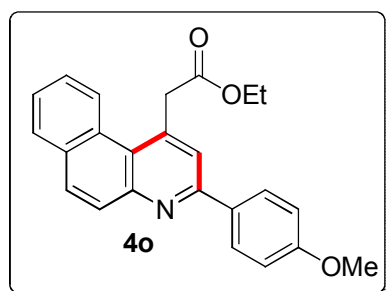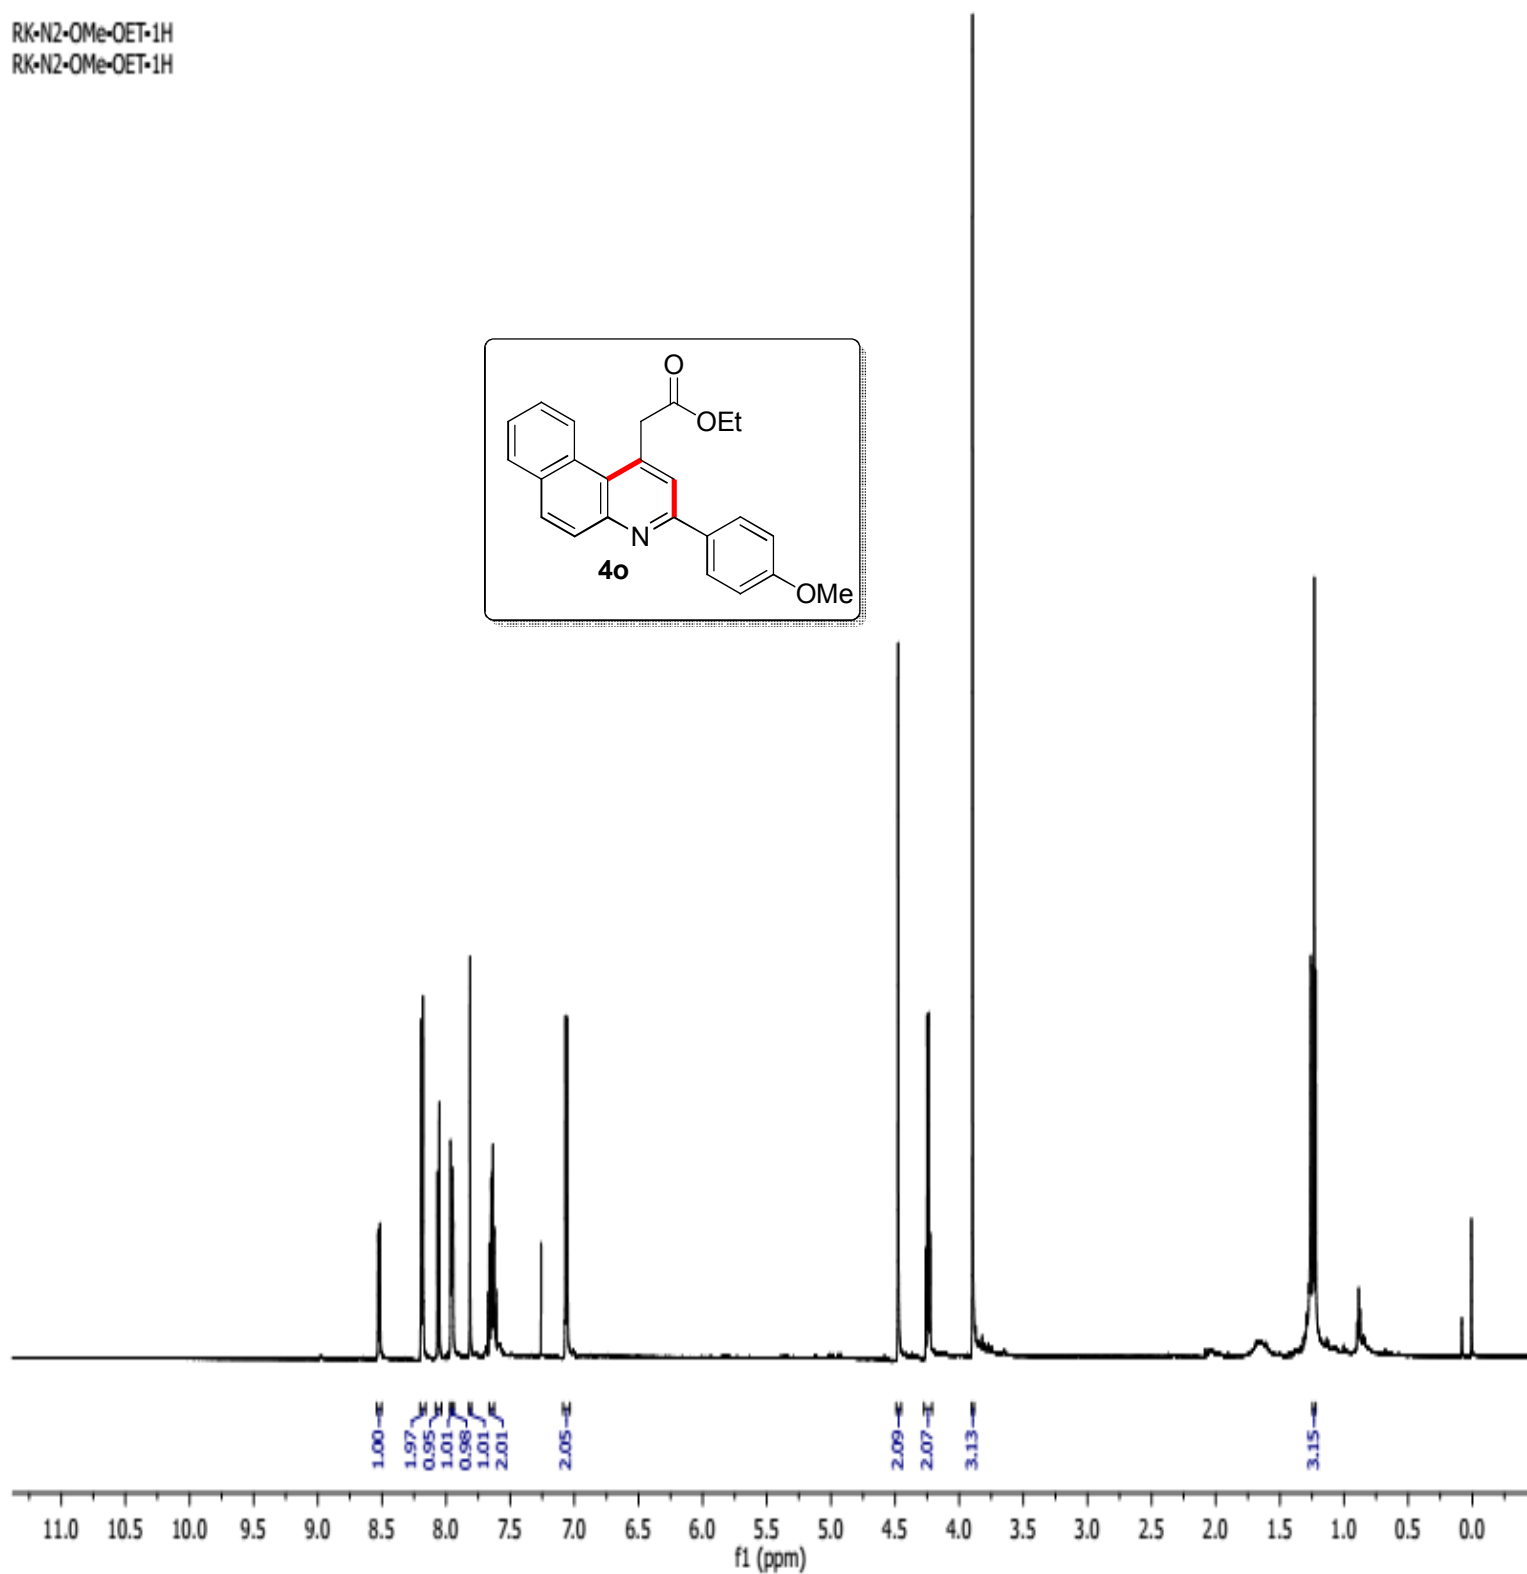

*<sup>13</sup>C NMR spectra of compound 4o*

RK-N2-OME-OET-13C.1.fid  
RK-N2-OME-OET-13C

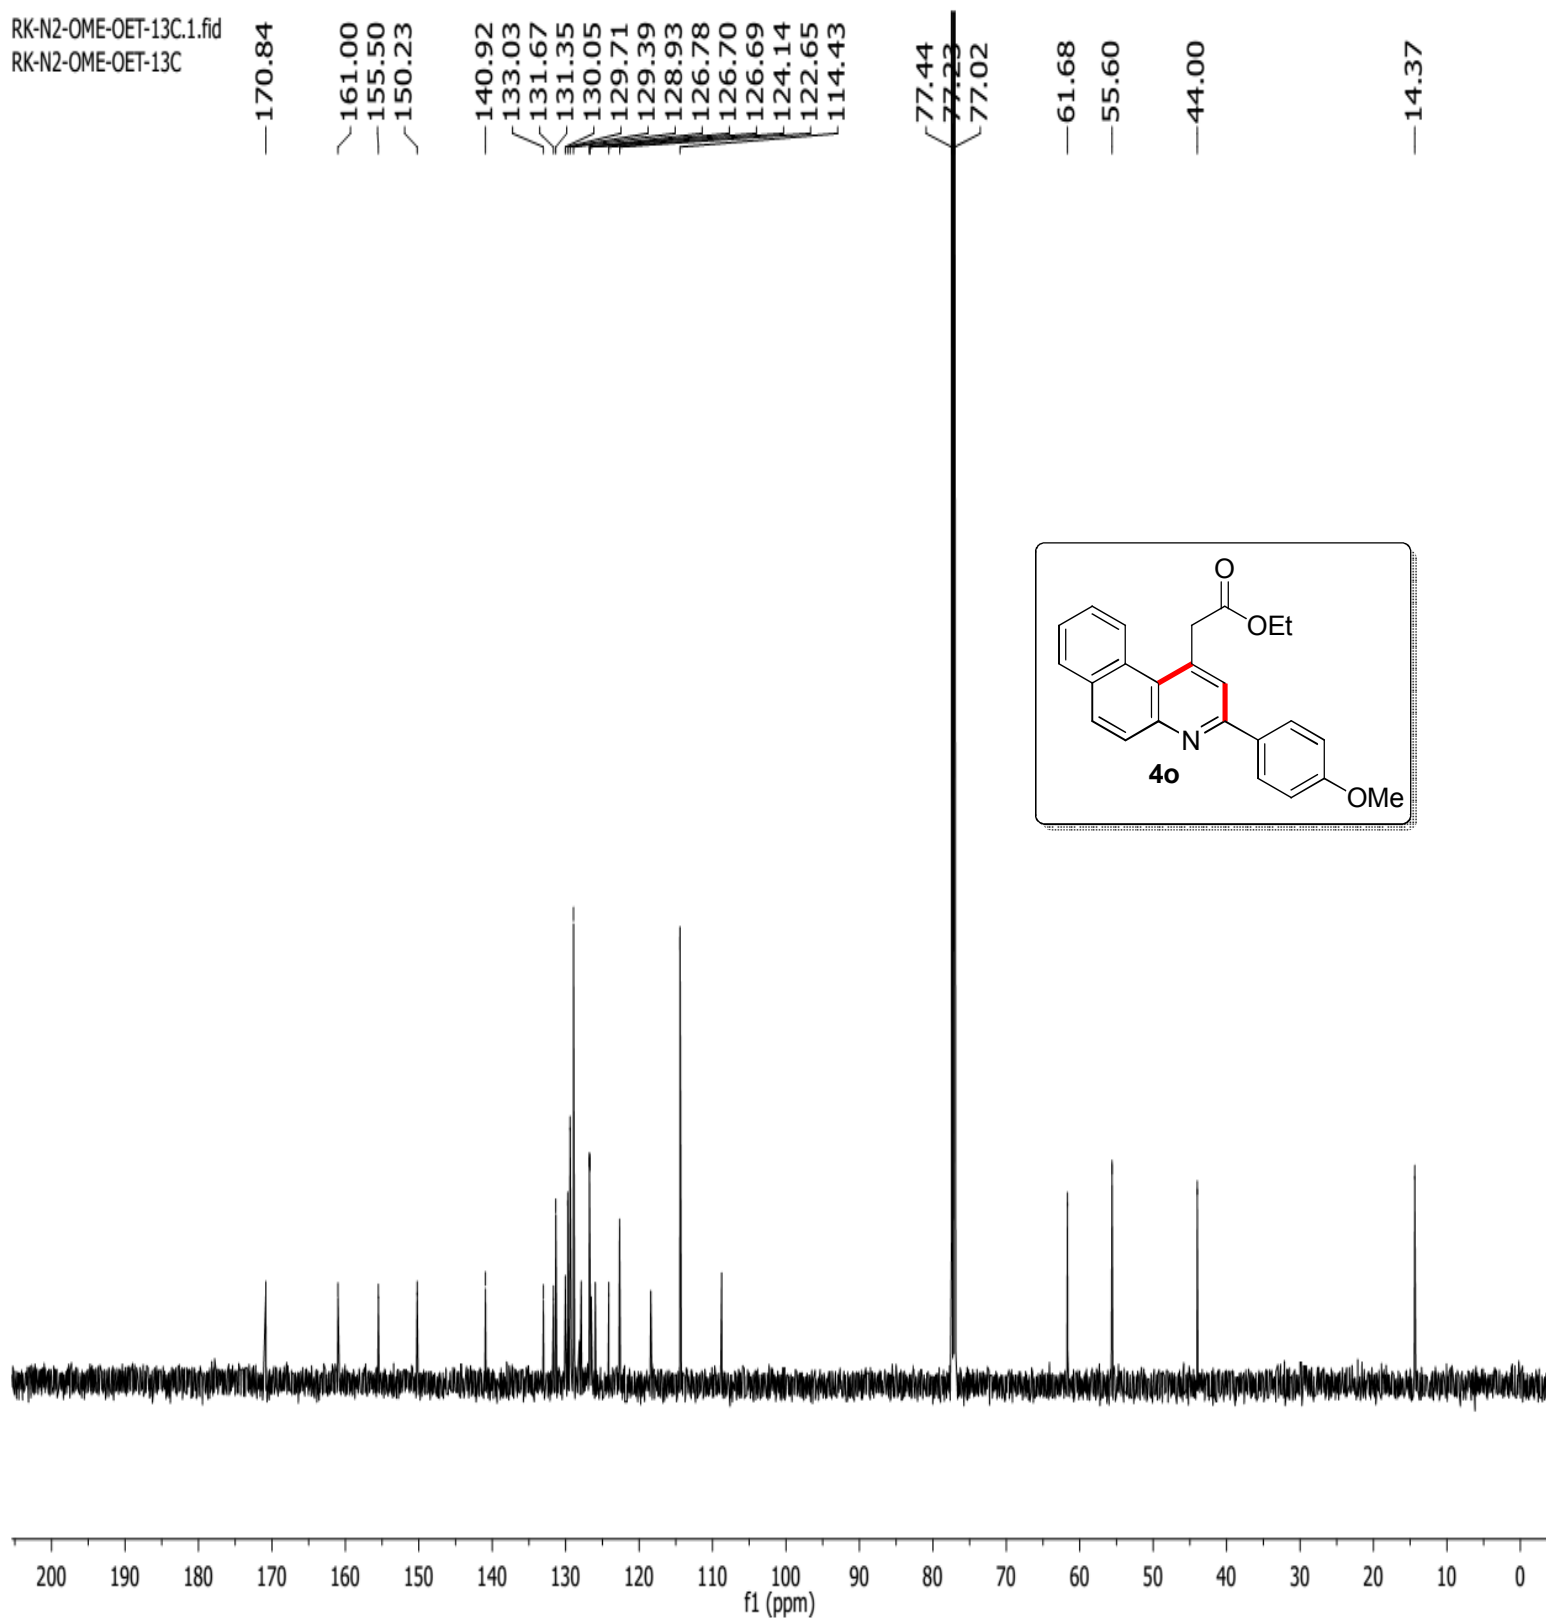

HRMS spectra of compound 4o

|               |                |             |             |                 |                                   |                        |                  |
|---------------|----------------|-------------|-------------|-----------------|-----------------------------------|------------------------|------------------|
| Sample Name   | Unavailable    | Position    | Unavailable | Instrument Name | Unavailable                       | User Name              | Unavailable      |
| Inj Vol       | Unavailable    | InjPosition | Unavailable | SampleType      | Unavailable                       | IRM Calibration Status | Some Ions Missed |
| Data Filename | RK-OME-OET-1.d | ACQ Method  |             | Comment         | Sample information is unavailable | Acquired Time          | Unavailable      |

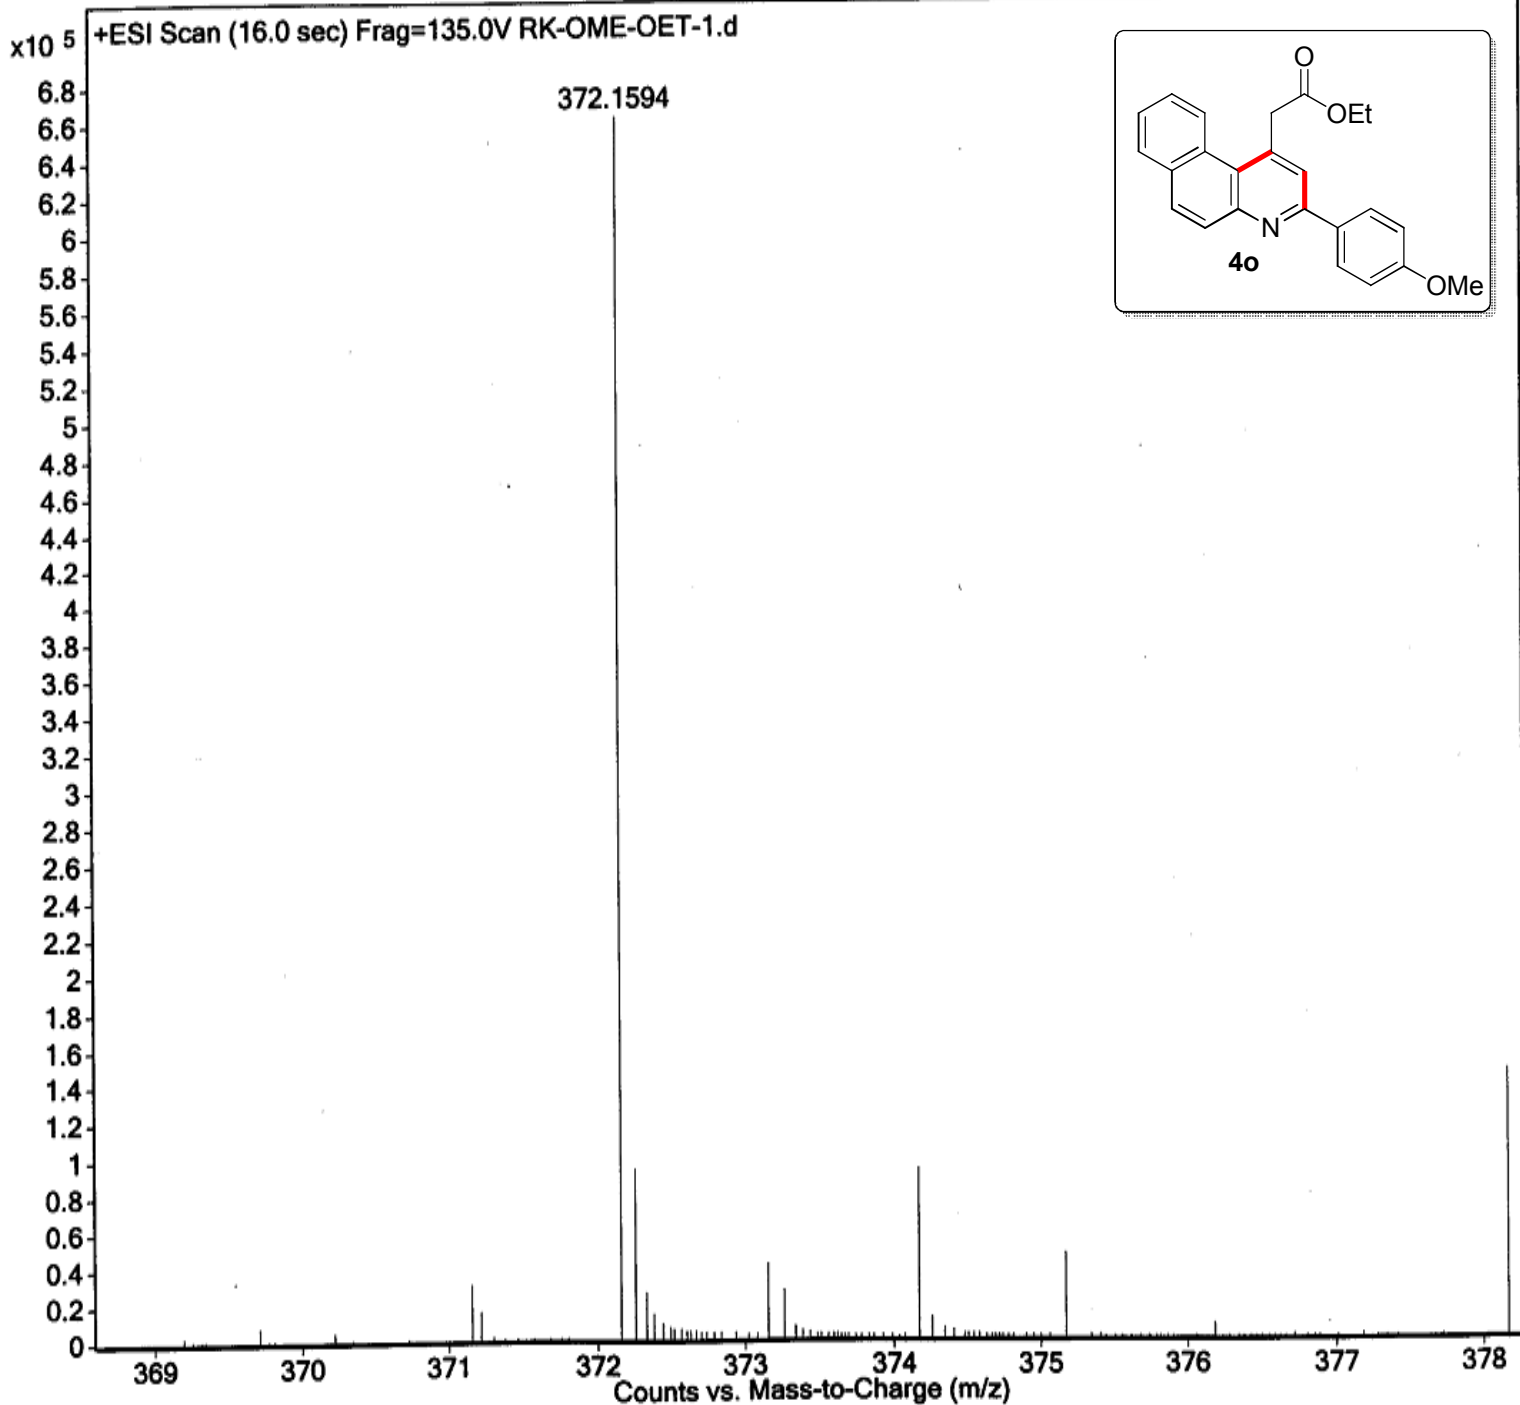

*<sup>1</sup>H NMR spectra of compound 4p*

RK-N2-2F-OET-1H  
RK-N2-2F-OET-1H

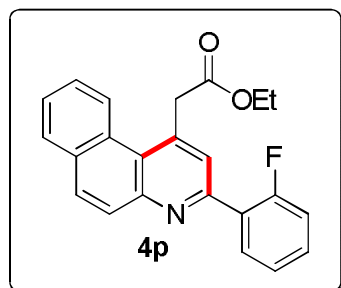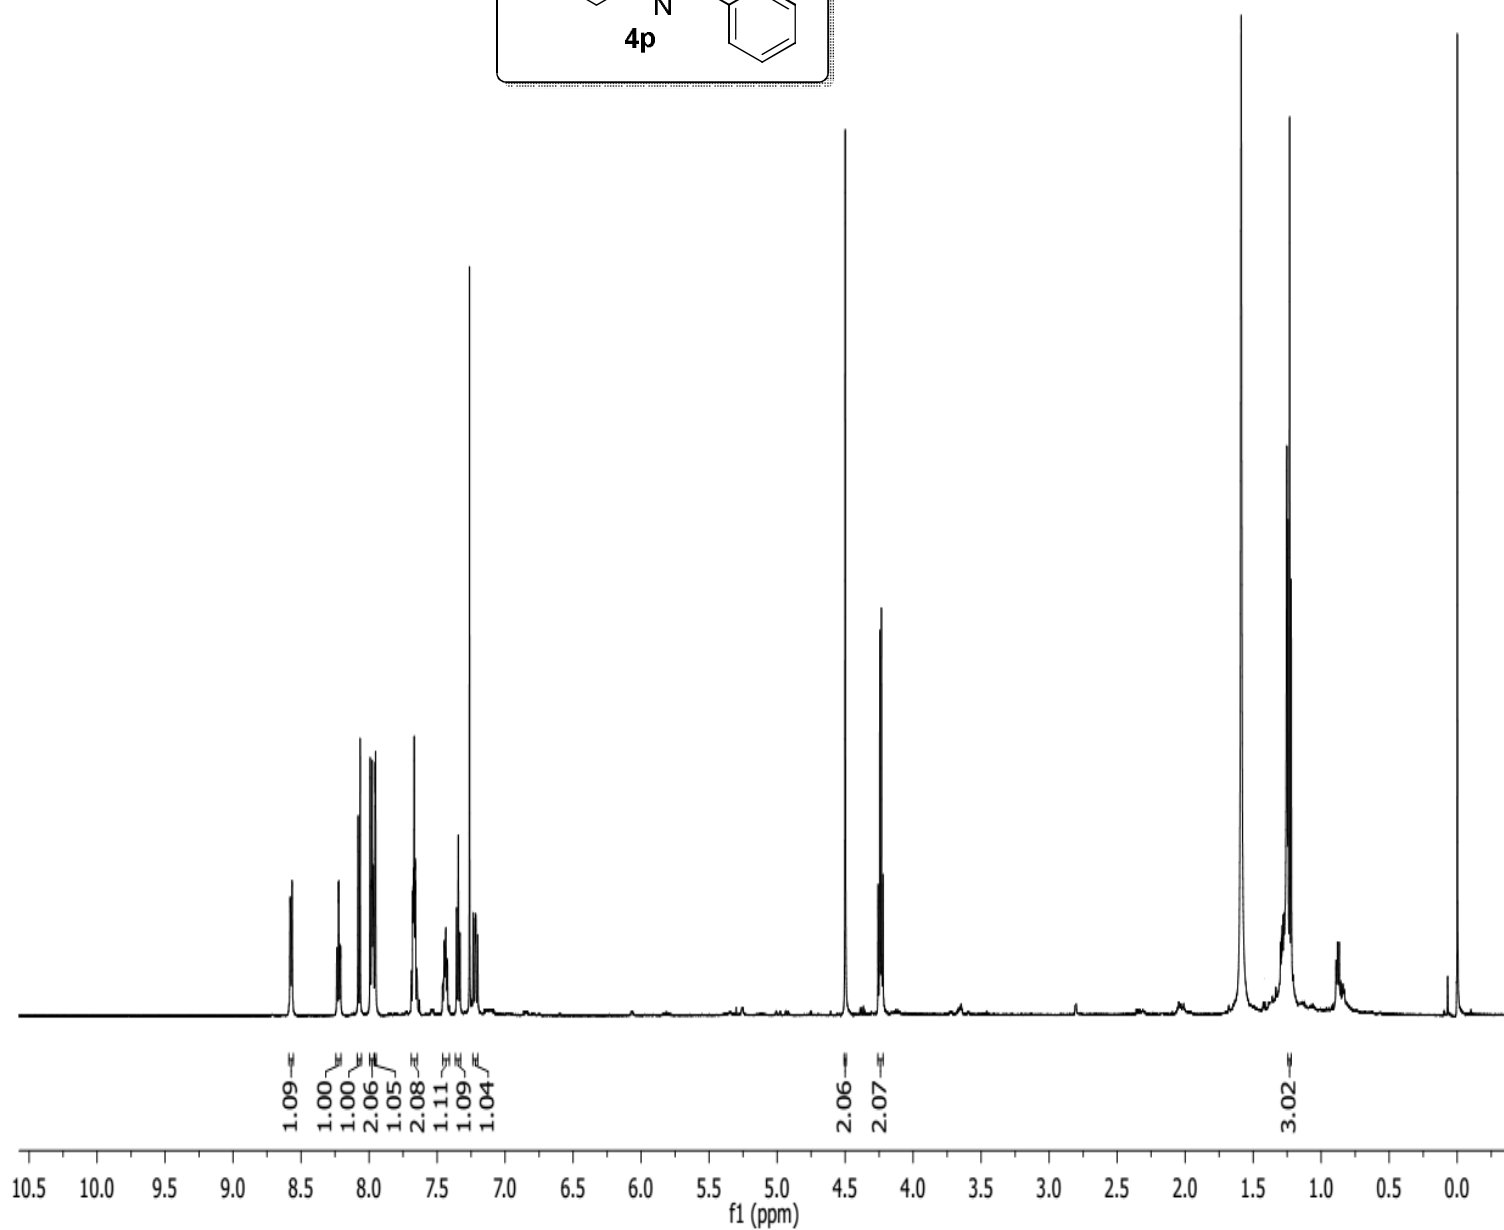



*<sup>13</sup>C NMR spectra of compound 4p*

RK-2F-OEt-13C.1.fid  
RK-2F-OEt-13C

—170.73  
~161.89  
~160.23  
~152.22  
~150.24  
—140.73  
133.27  
131.64  
131.62  
131.51  
131.07  
131.02  
129.93  
129.61  
129.43  
127.09  
127.05  
126.85  
124.94  
124.91  
124.75  
116.56  
116.41  
77.44  
77.23  
77.02  
—61.73  
—44.00  
—14.33

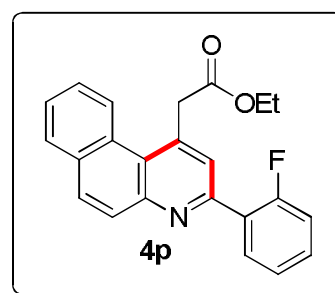

190 180 170 160 150 140 130 120 110 100 90 80 70 60 50 40 30 20 10 0  
f1 (ppm)

HRMS spectra of compound 4p

|               |             |             |        |                 |              |                        |                      |
|---------------|-------------|-------------|--------|-----------------|--------------|------------------------|----------------------|
| Sample Name   | RK-2F-OET   | Position    | Vial 1 | Instrument Name | Instrument 1 | User Name              |                      |
| Inj Vol       | 0           | InjPosition |        | SampleType      | Sample       | IRM Calibration Status | Some Ions Missed     |
| Data Filename | RK-2F-OET.d | ACQ Method  |        | Comment         |              | Acquired Time          | 12/4/2015 5:18:19 PM |

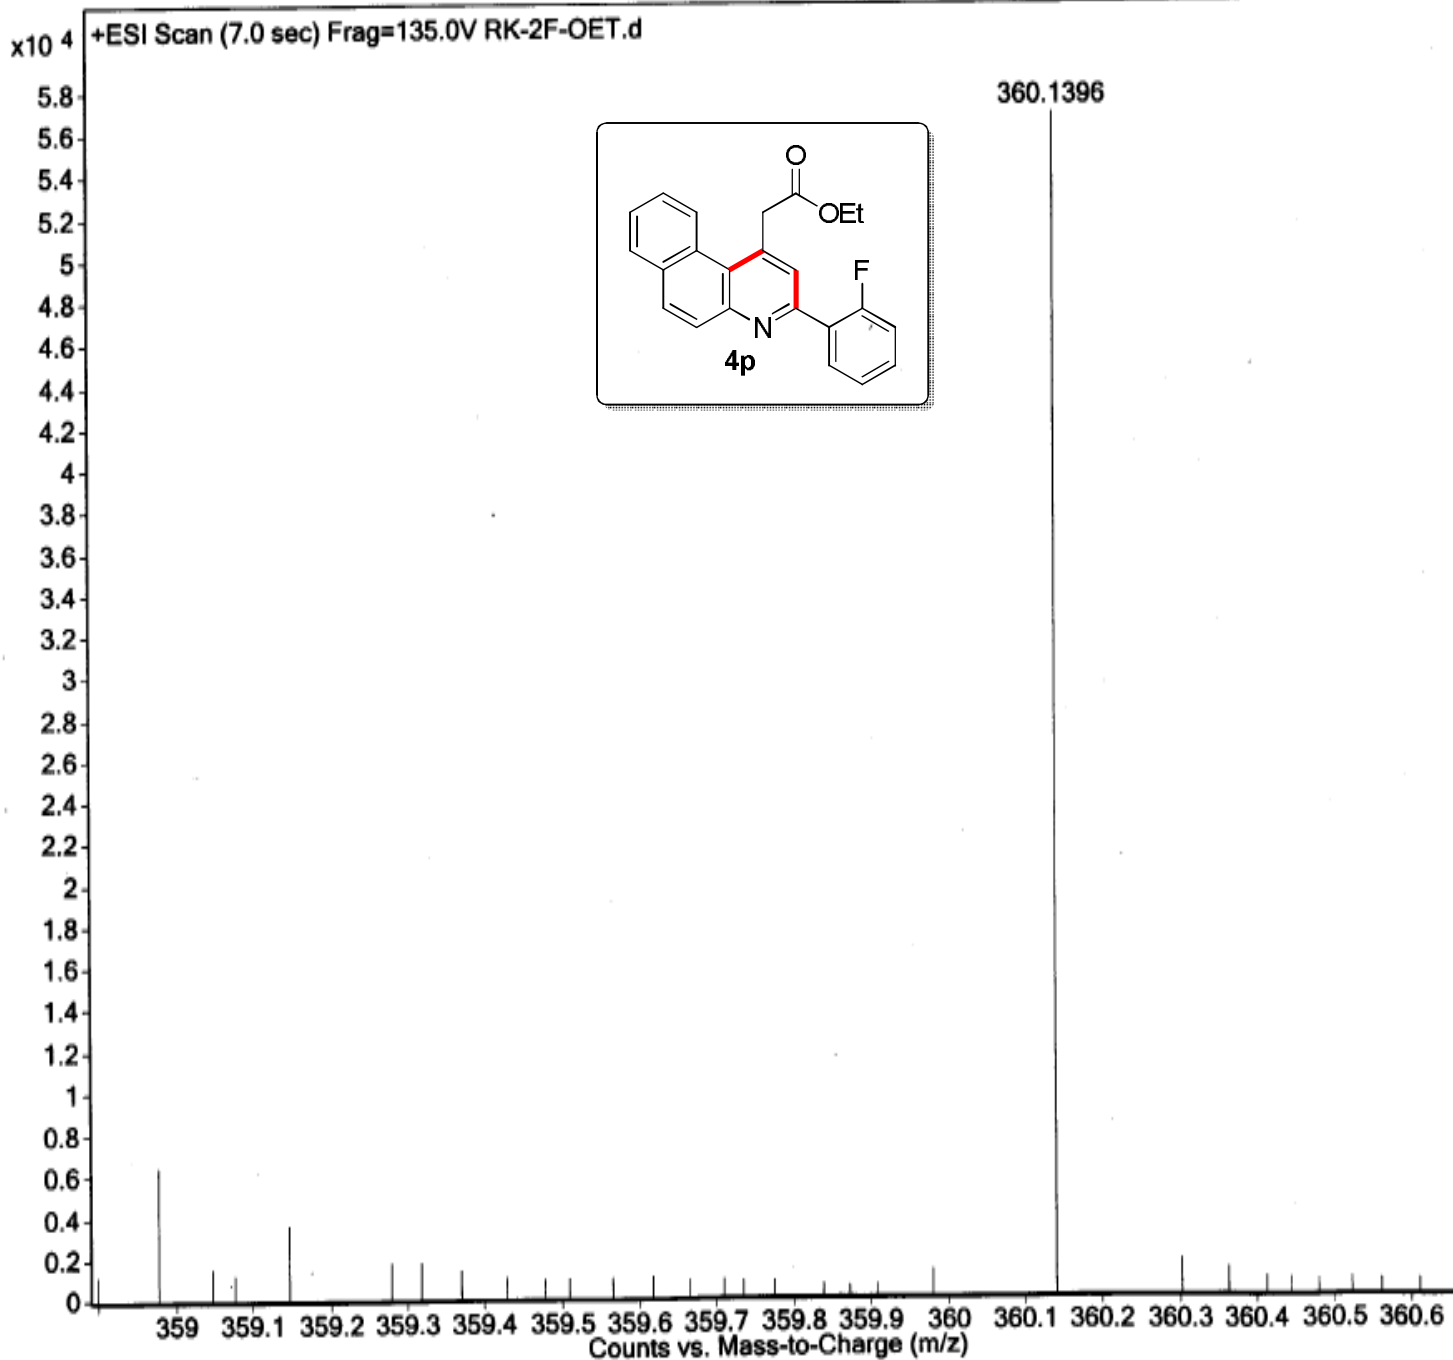

*<sup>1</sup>H NMR spectra of compound 4q*

Current Data Parameters  
NAME RK-2Cl-ORL-LHA  
EXFNO 1  
PROCNO 1

F2 - Acquisition Parameters  
Date\_ 20141209  
Time\_ 13.25  
INSTRUM spect  
PROBHD 5 mm PABBO BB/  
PULPROG zg30  
TD 32768  
SOLVENT CDCl3  
NS 16  
DS 2  
SWH 12019.230 Hz  
FIDRES 0.366798 Hz  
AQ 1.3631488 sec  
RG 89.67  
DM 41.600 usec  
DE 6.50 usec  
TR 298.4 K  
D1 1.00000000 sec  
TDO 1

\*\*\*\*\* CHANNEL f1 \*\*\*\*\*  
SFO1 600.1737063 MHz  
NUC1 1H  
P1 12.00 usec  
PLW1 21.00000000 W

F2 - Processing parameters  
SI 16384  
SF 600.1700148 MHz  
WDW EM  
SSB 0  
LB 0.30 Hz  
GB 0  
PC 1.00

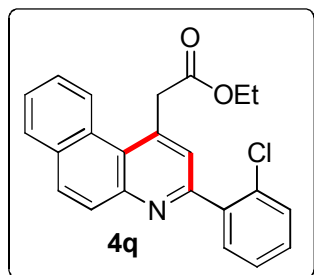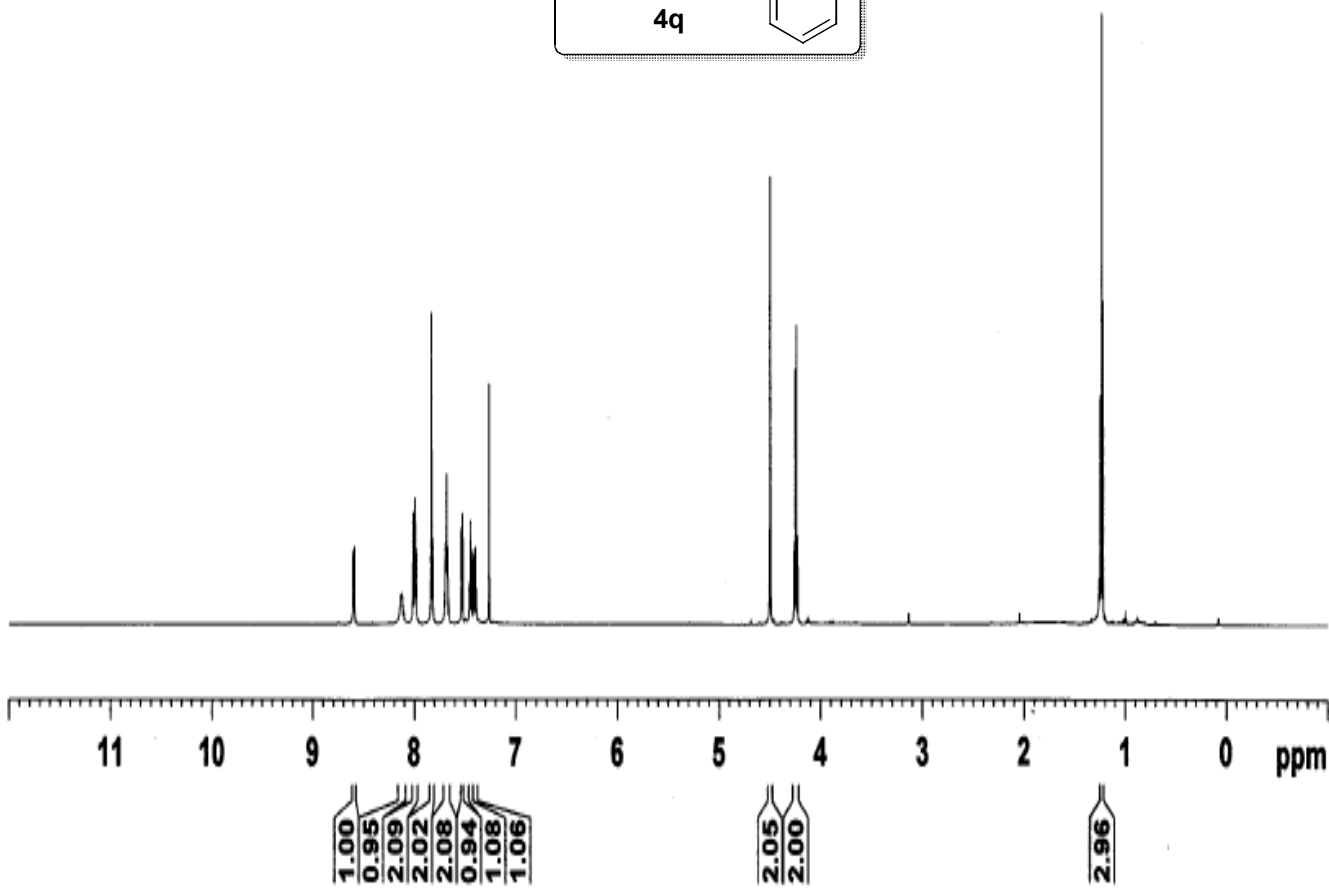

*<sup>13</sup>C NMR spectra of compound 4q*

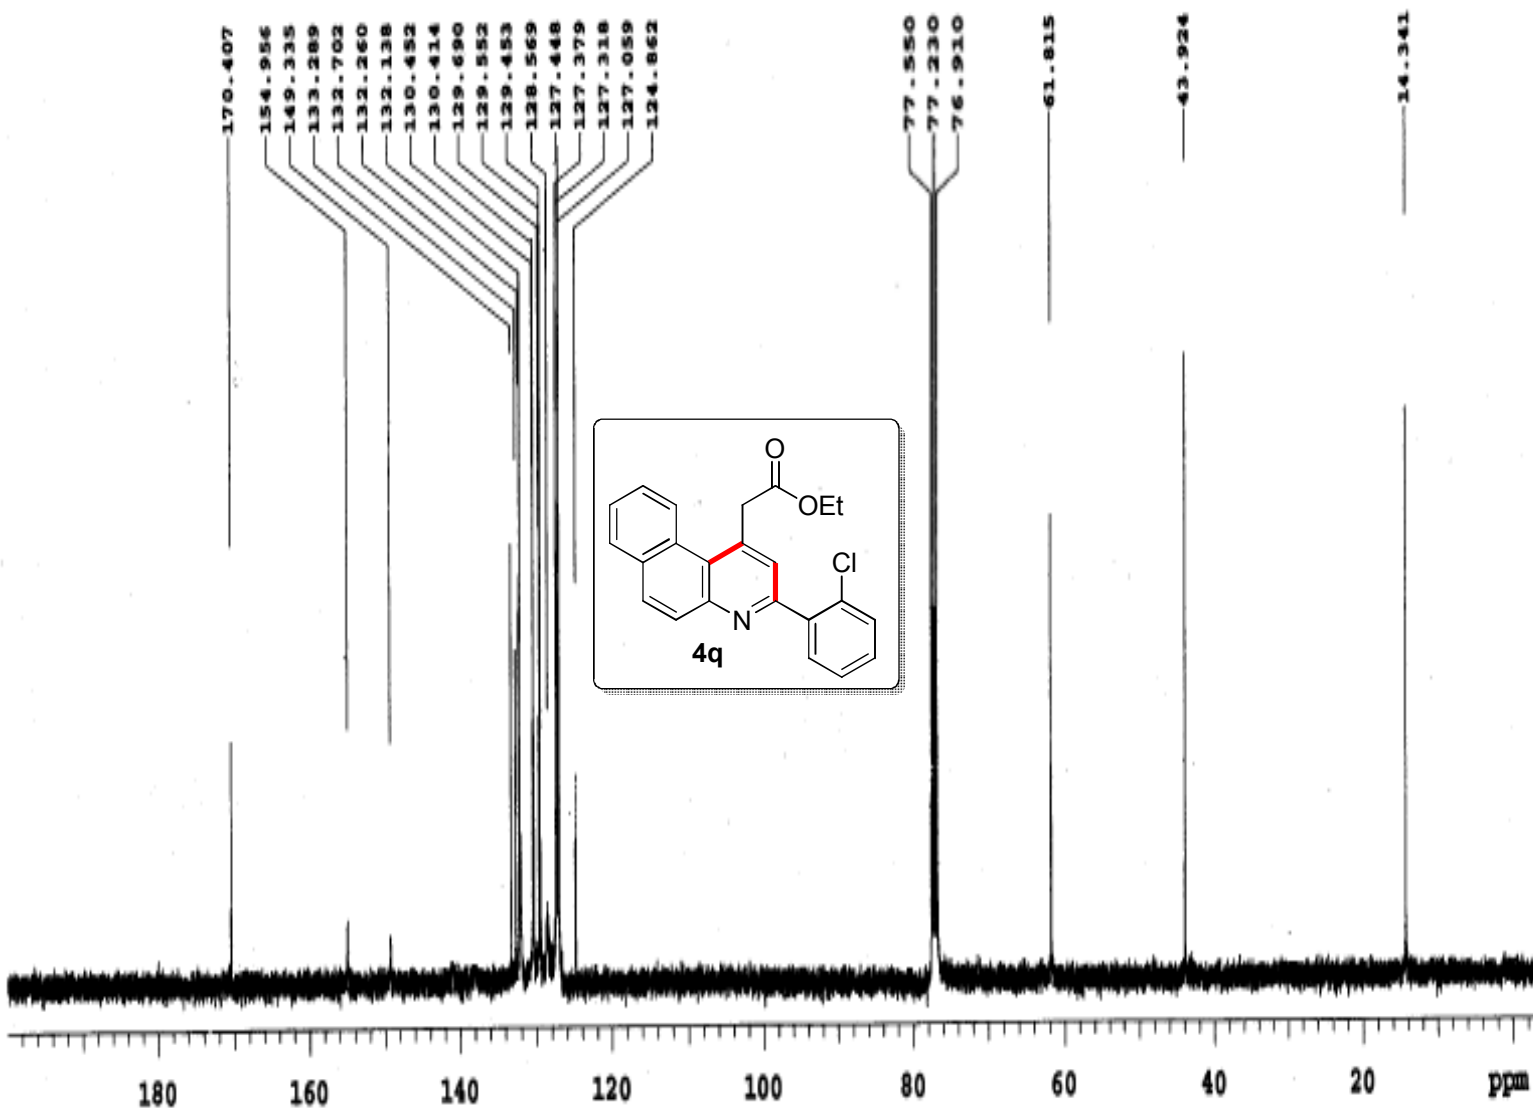

|                                                                                                                                                                                                                                        |                                                                                                                                                                                           |                                                                                                                                                        |                                                                                                                                                                                                                                      |
|----------------------------------------------------------------------------------------------------------------------------------------------------------------------------------------------------------------------------------------|-------------------------------------------------------------------------------------------------------------------------------------------------------------------------------------------|--------------------------------------------------------------------------------------------------------------------------------------------------------|--------------------------------------------------------------------------------------------------------------------------------------------------------------------------------------------------------------------------------------|
| <p><b>PULSE SEQUENCE</b><br/>                 Relax. delay 1.000 sec<br/>                 Pulse 45.0 degrees<br/>                 Acq. time 1.304 sec<br/>                 Width 25125.6 Hz<br/>                 12710 repetitions</p> | <p><b>OBSERVE</b> C13, 100.5425849<br/> <b>DECOUPLE</b> H1, 399.8529994<br/>                 Power 42 dB<br/>                 continuously on<br/>                 WALTZ-16 modulated</p> | <p><b>DATA PROCESSING</b><br/>                 Line broadening 0.5 Hz<br/>                 FT size 65536<br/>                 Total time 8.1 hours</p> | <p><b>EX-2CL-ET-13C</b><br/>                 Solvent: cdcl3<br/>                 Temp. 25.0 C / 298.1 K<br/>                 Operator: chem<br/>                 File: EX-2CL-ET-13C<br/>                 Mercury-400 "IITG-MMR"</p> |
|----------------------------------------------------------------------------------------------------------------------------------------------------------------------------------------------------------------------------------------|-------------------------------------------------------------------------------------------------------------------------------------------------------------------------------------------|--------------------------------------------------------------------------------------------------------------------------------------------------------|--------------------------------------------------------------------------------------------------------------------------------------------------------------------------------------------------------------------------------------|

HRMS spectra of compound 4q

| Sample Name   | Position    | Instrument Name | User Name              |
|---------------|-------------|-----------------|------------------------|
| Inj Vol       | InjPosition | SampleType      | IRM Calibration Status |
| Data Filename | ACQ Method  | Comment         | Acquired Time          |

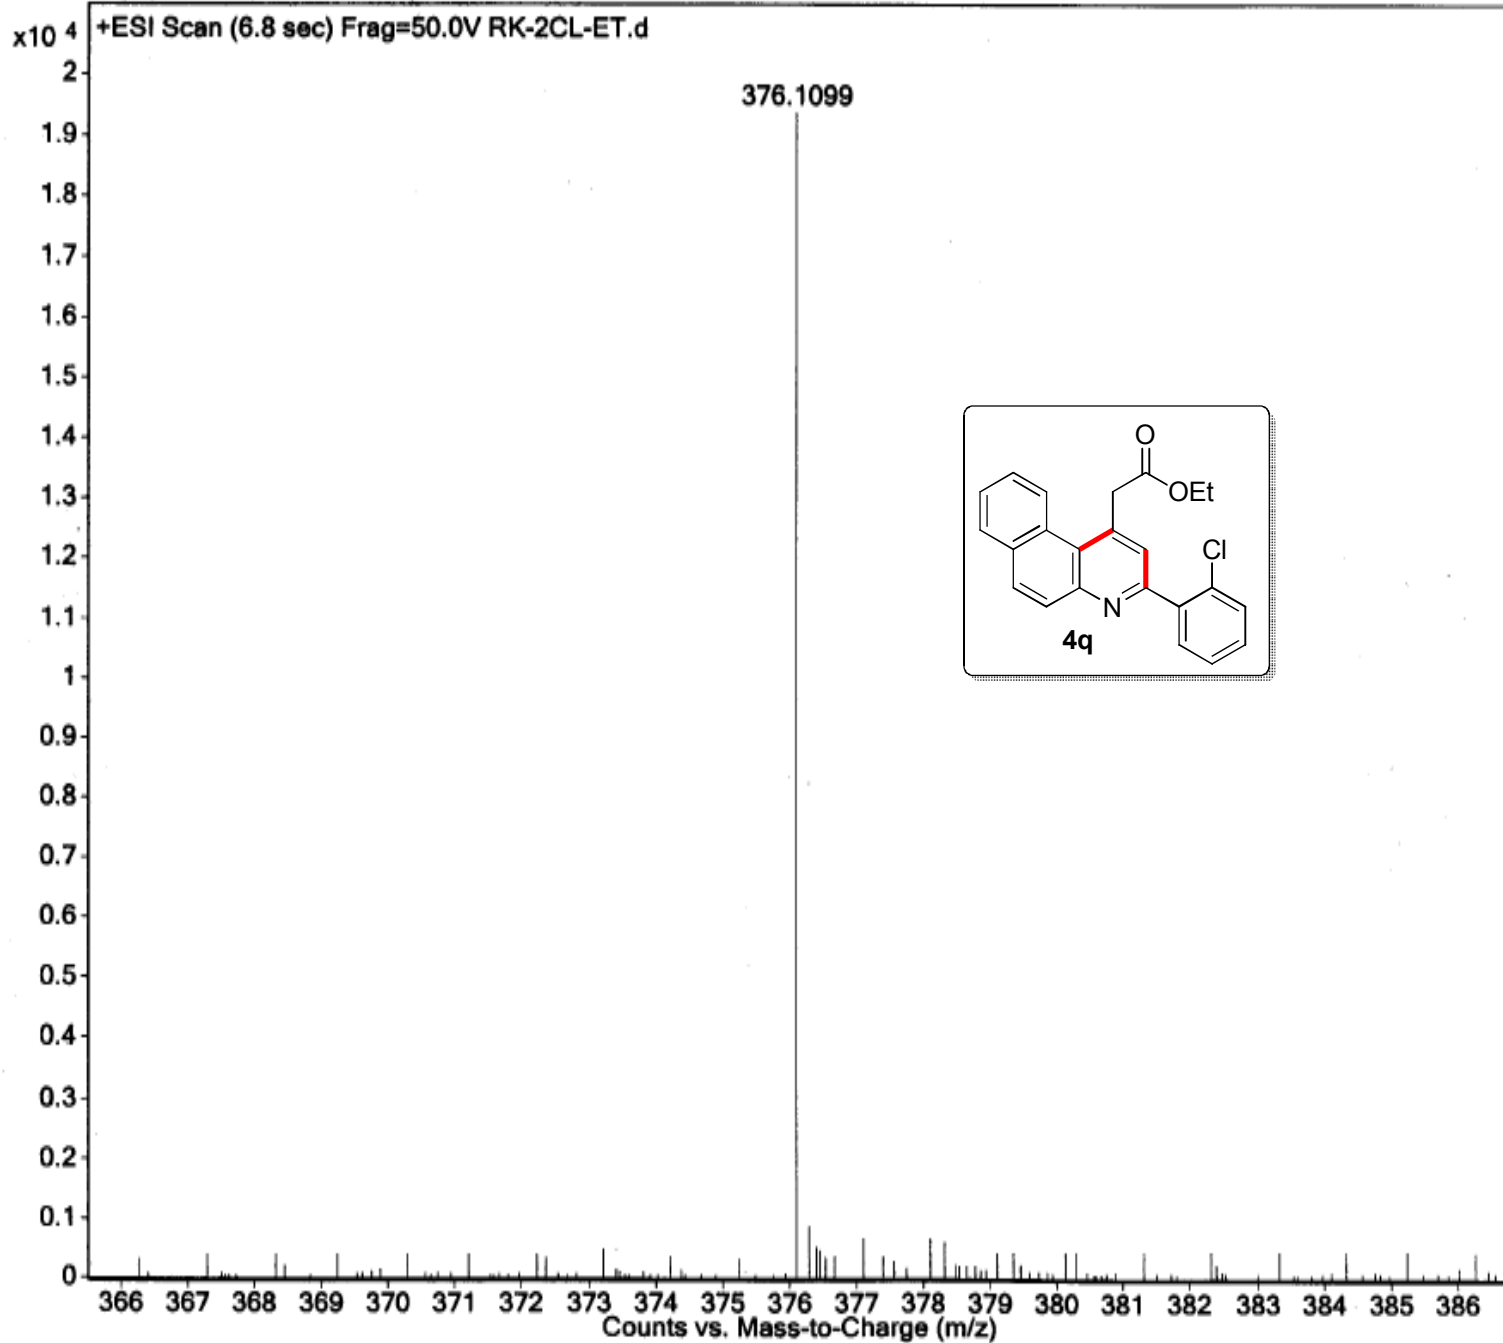

*<sup>1</sup>H NMR spectra of compound 4r*

RK-3BRET-1H  
RK-3BRET-1H

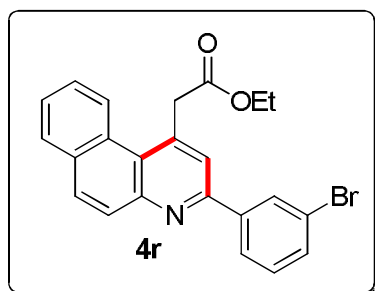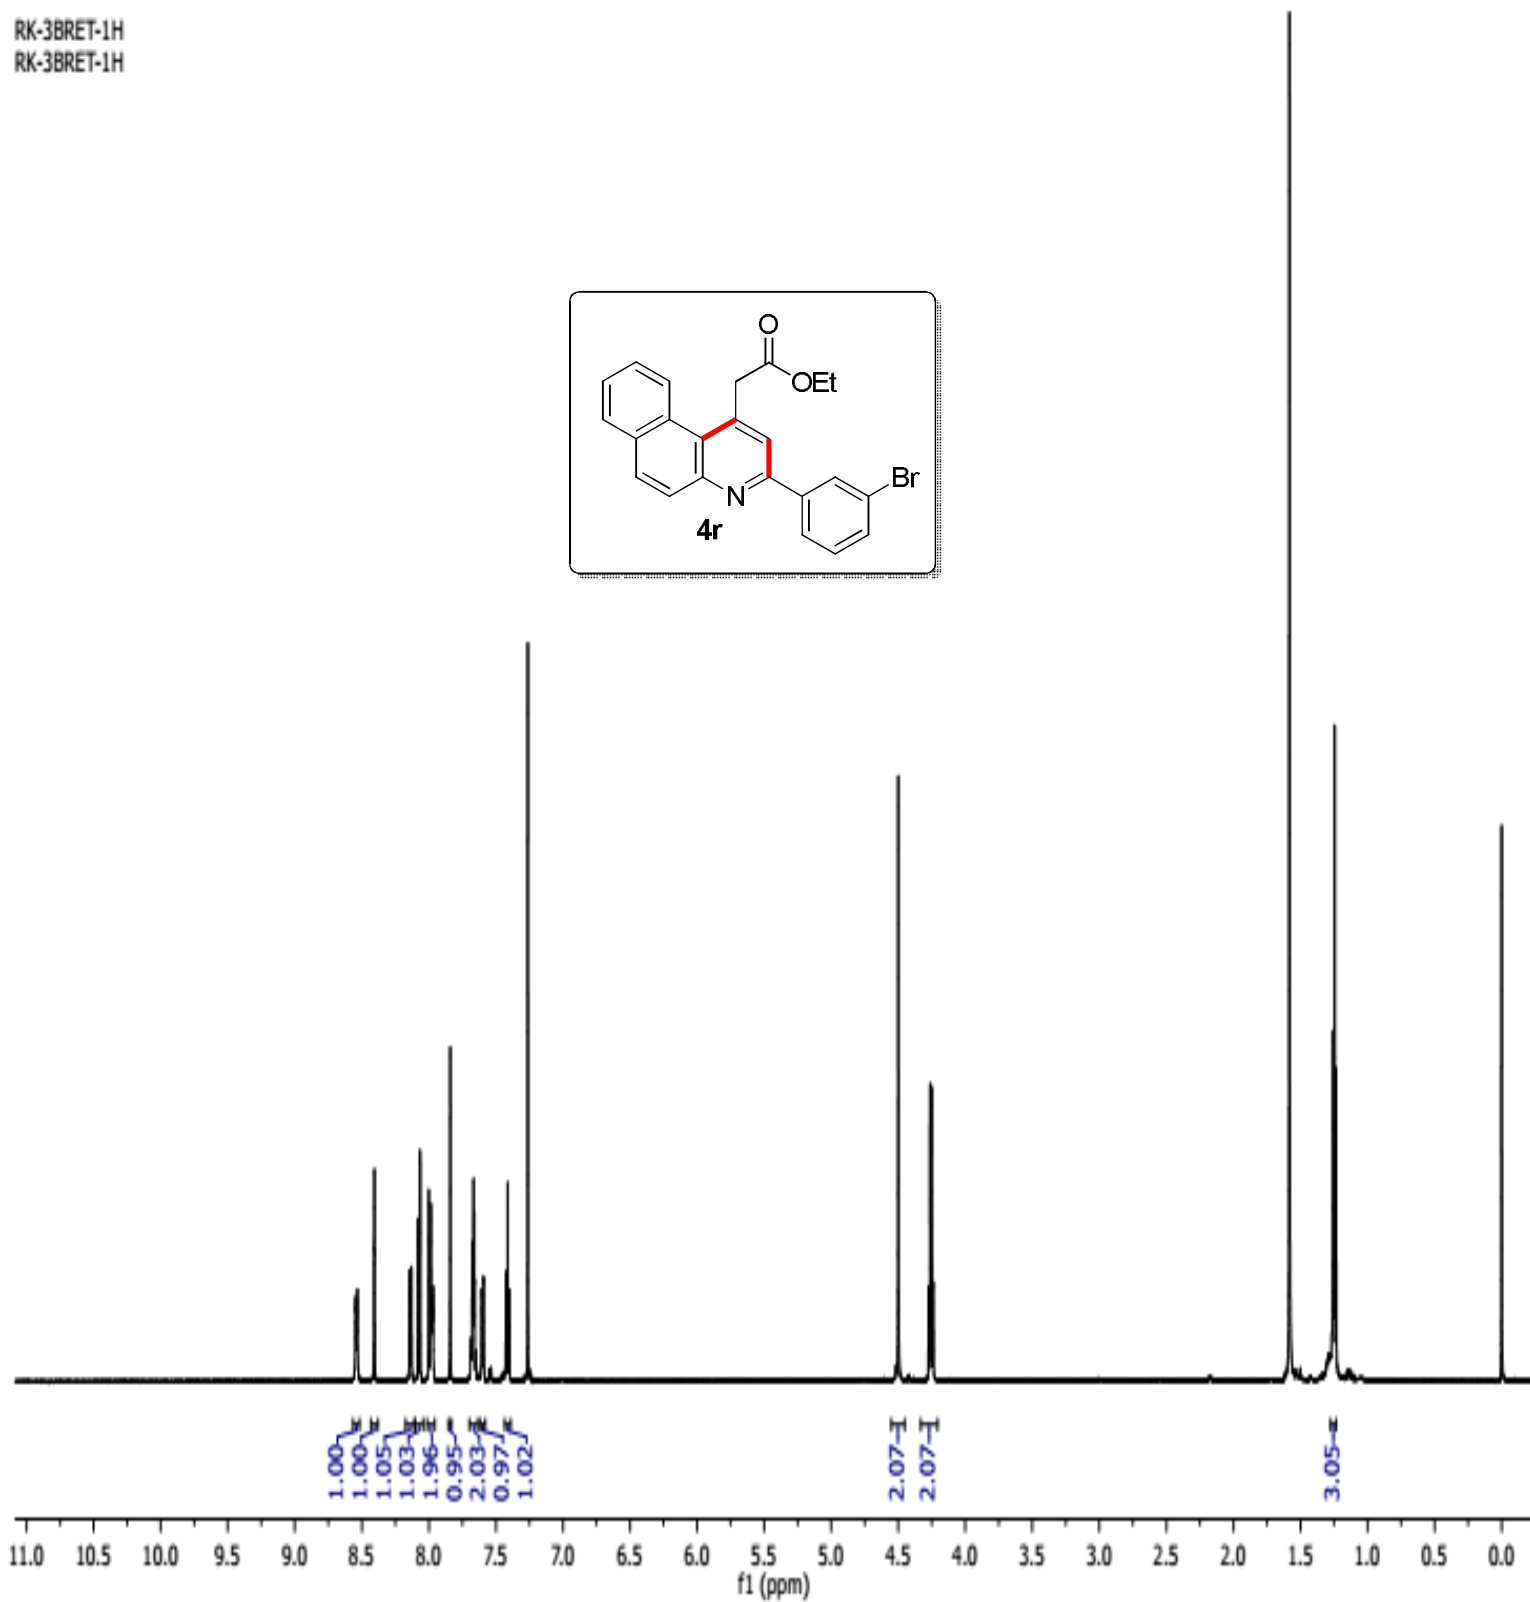

*<sup>13</sup>C NMR spectra of compound 4r*

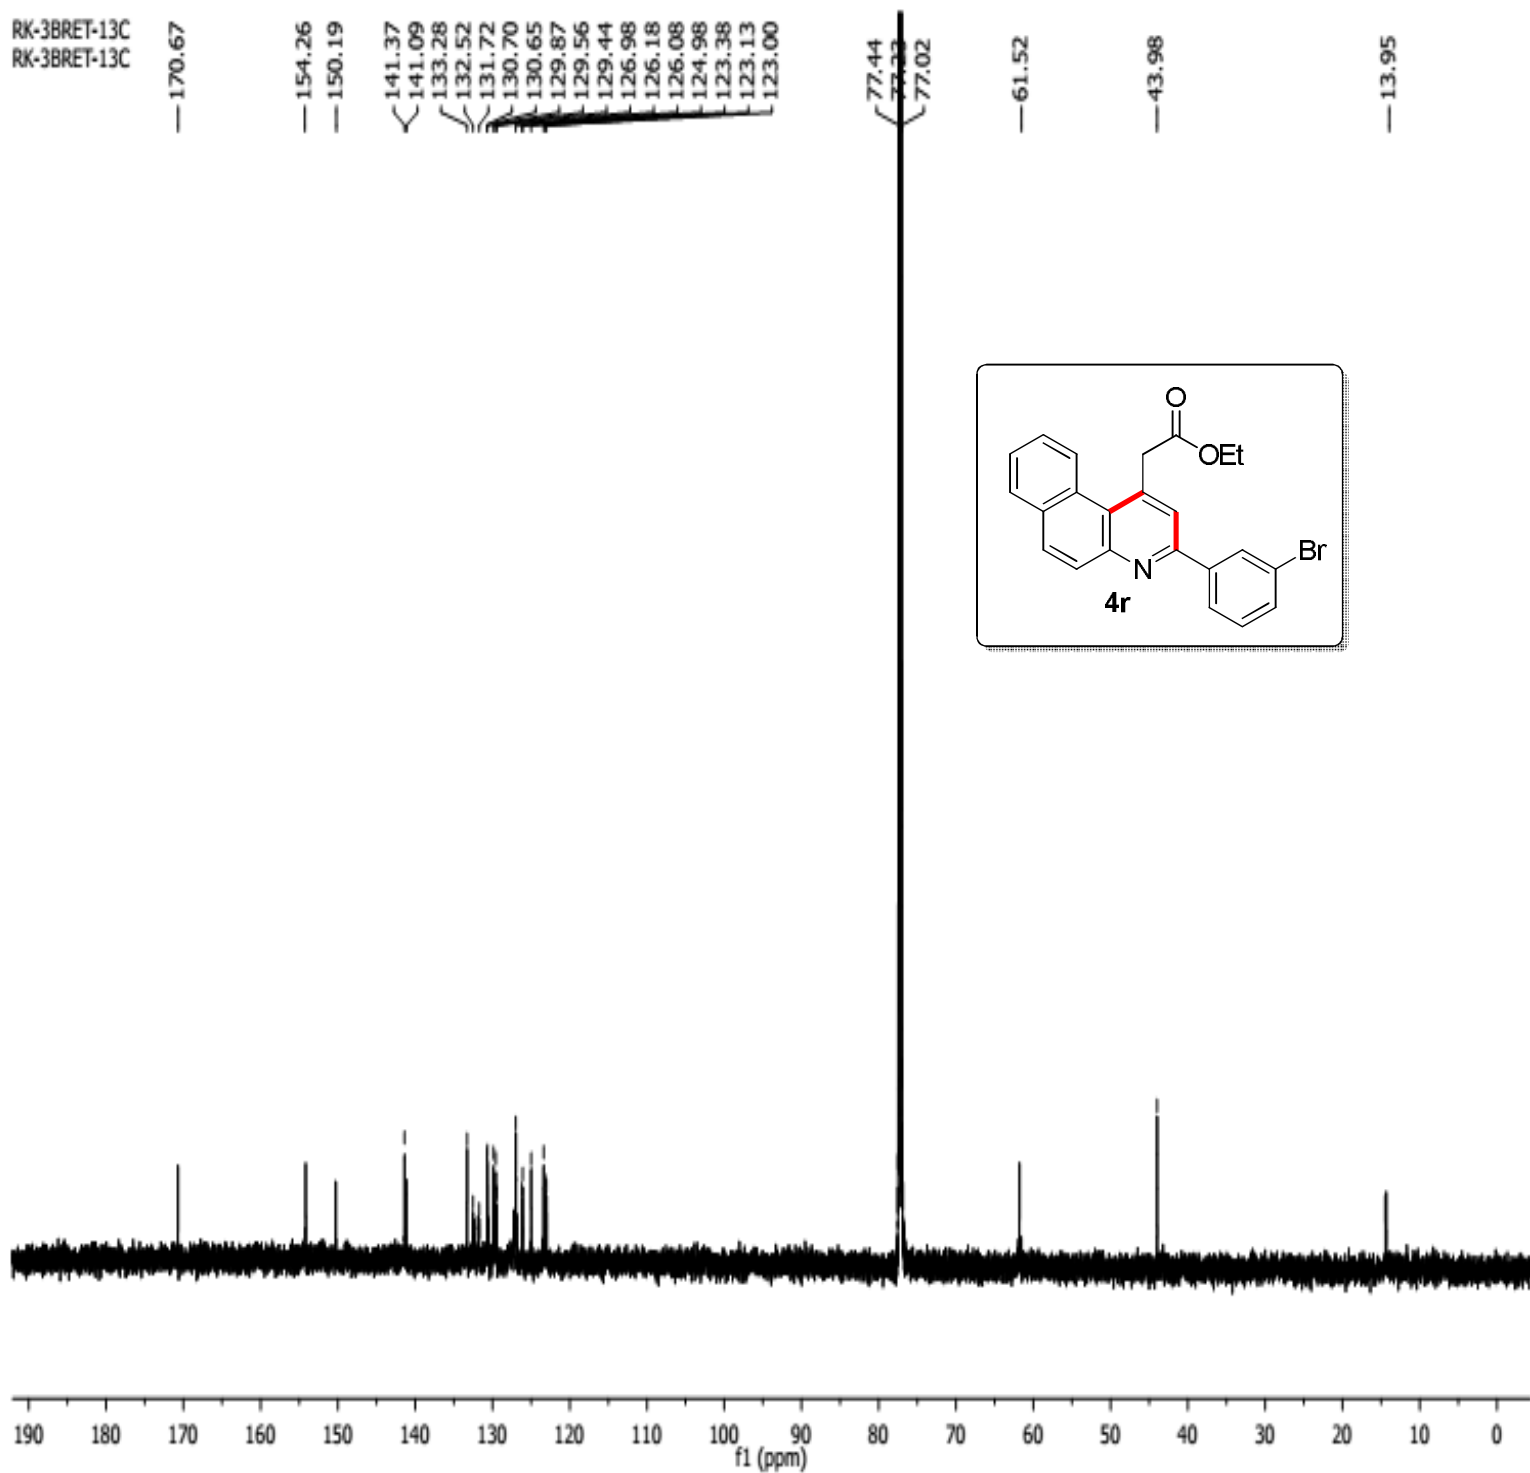

HRMS spectra of compound 4r

|               |                  |             |             |                 |                                   |                        |             |
|---------------|------------------|-------------|-------------|-----------------|-----------------------------------|------------------------|-------------|
| Sample Name   | Unavailable      | Position    | Unavailable | Instrument Name | Unavailable                       | User Name              | Unavailable |
| Inj Vol       | Unavailable      | InjPosition | Unavailable | SampleType      | Unavailable                       | IRM Calibration Status | Success     |
| Data Filename | RK-3BR-OET-3-R.d | ACQ Method  |             | Comment         | Sample information is unavailable | Acquired Time          | Unavailable |

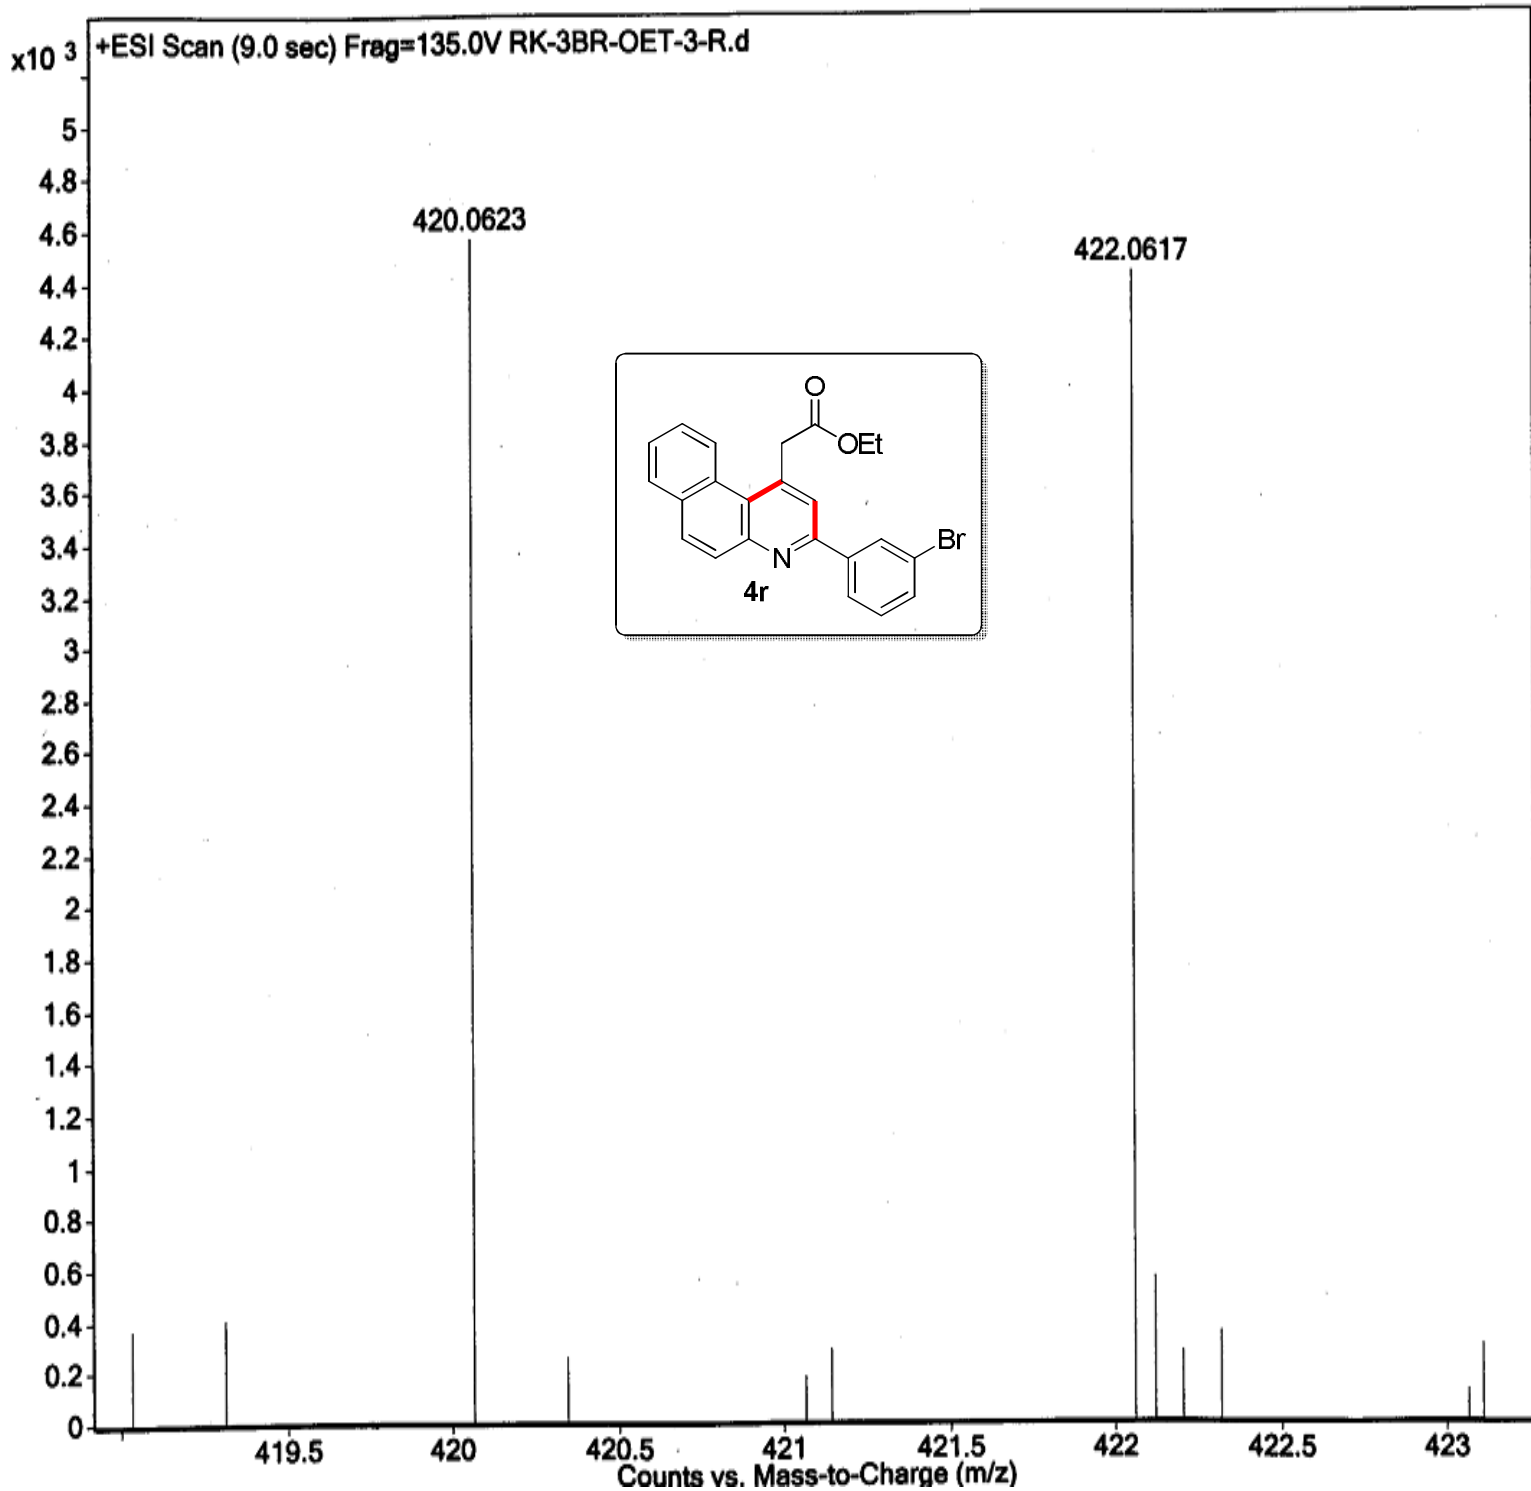



# <sup>1</sup>H NMR spectra of compound 4s

RK-ME -OALL-1B-1H

Sample Name:

RK-ME -OALL-1B-1H

Data Collected on:

IITG-NMR-mercury400

Archive directory:

Sample directory:

FidFile: RK-ME -OALL-1B-1H

Pulse Sequence: PROTON (s2pul)

Solvent: cdcl3

Data collected on: Sep 14 2014

Temp. 25.0 C / 298.1 K

Operator: chem

Relax. delay 1.000 sec

Pulse 45.0 degrees

Acq. time 2.561 sec

Width 6398.0 Hz

32 repetitions

OBSERVE H1, 399.8509633 MHz

DATA PROCESSING

FT size 32768

Total time 2 min 12 sec

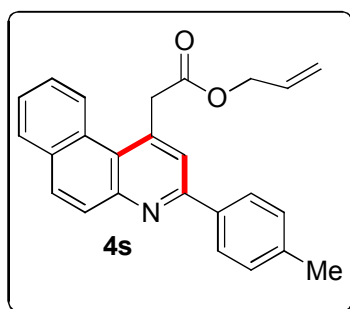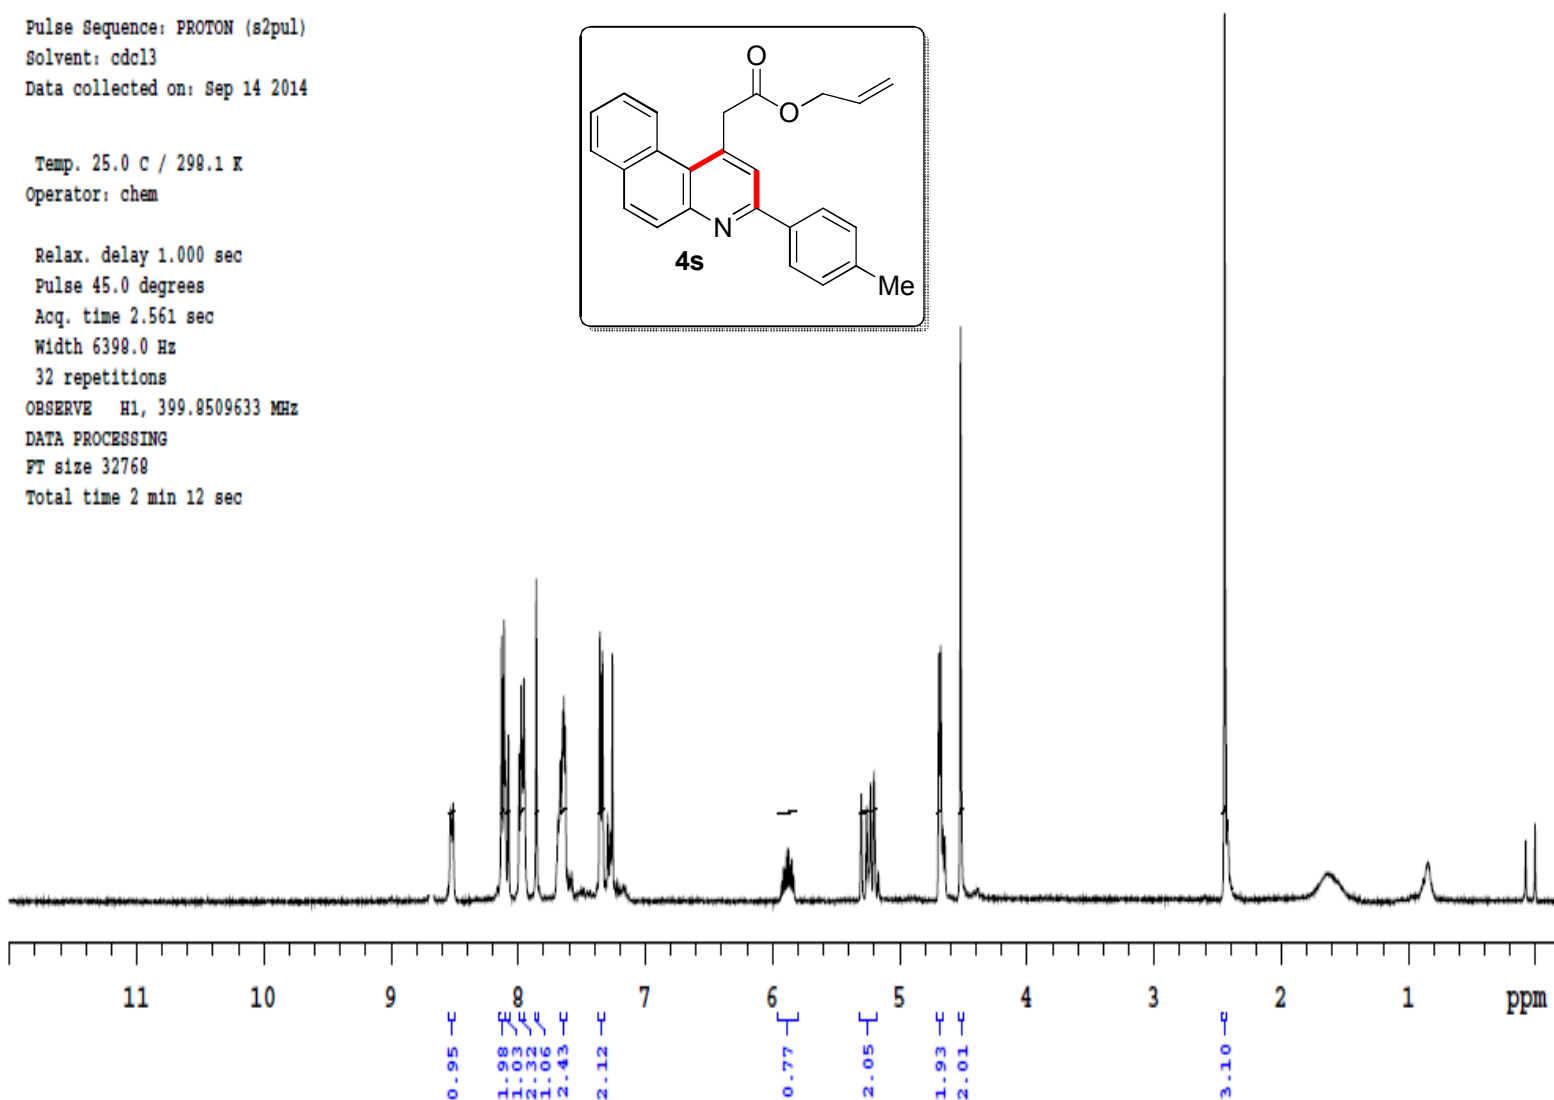

*<sup>13</sup>C NMR spectra of compound 4s*

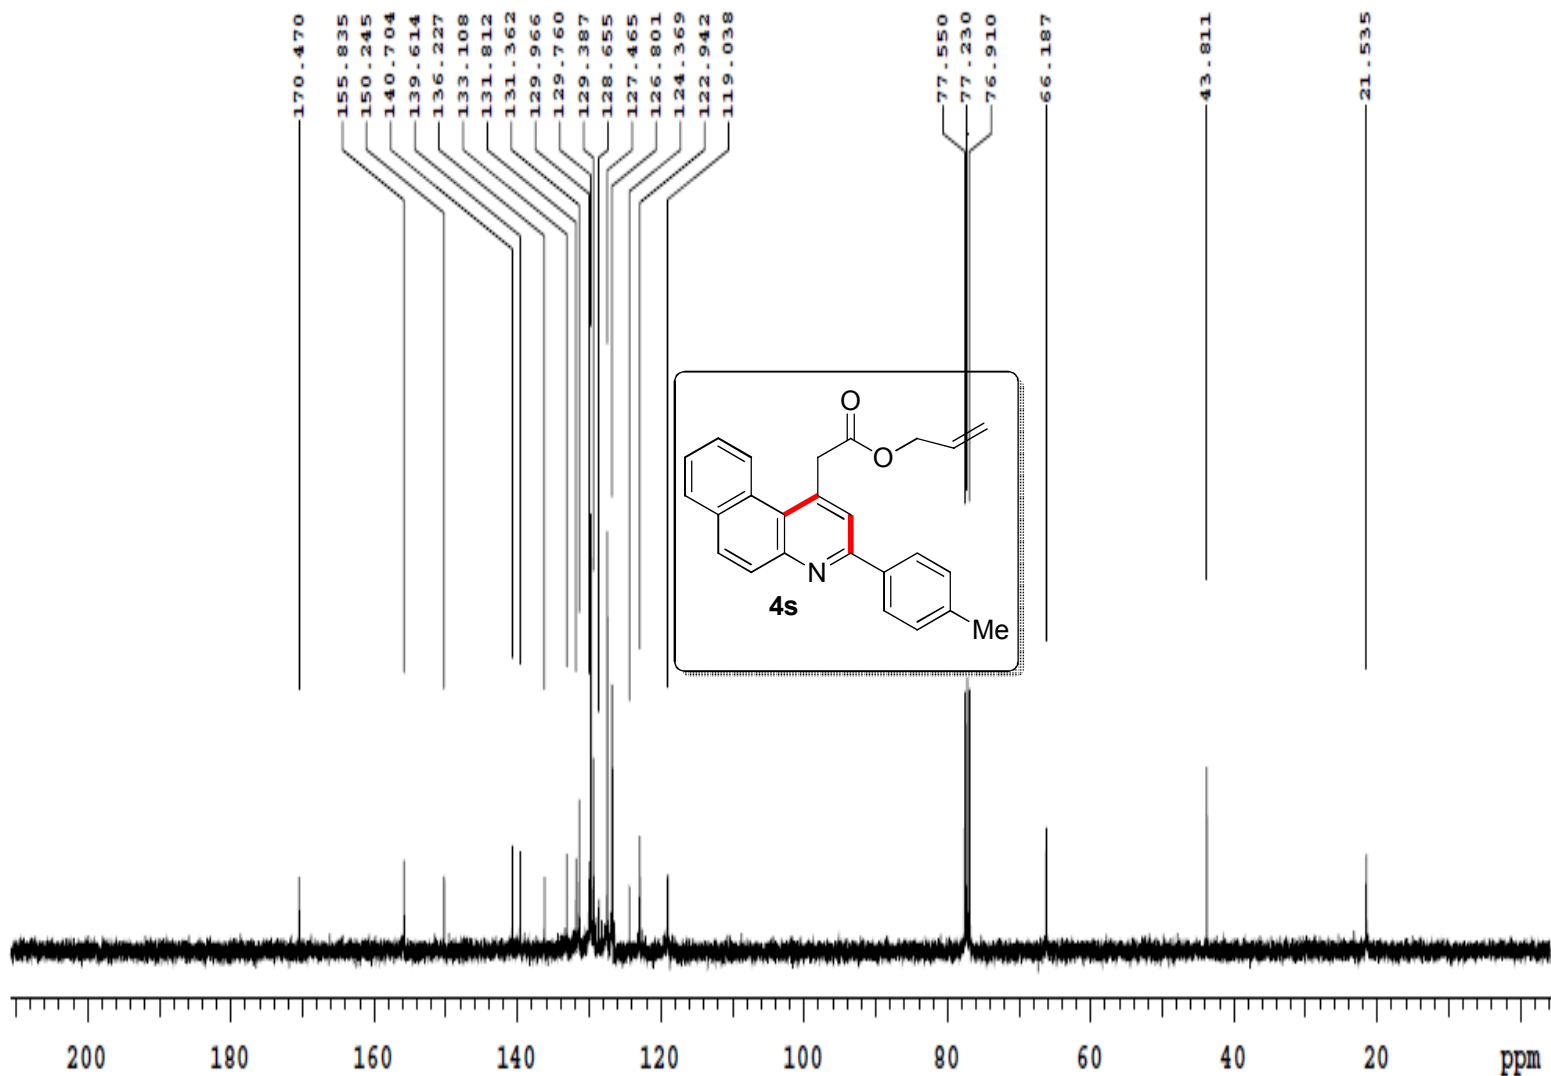

|                                                                                                                                     |                                                                                                                            |                                                                                            |                                                                                                                                            |
|-------------------------------------------------------------------------------------------------------------------------------------|----------------------------------------------------------------------------------------------------------------------------|--------------------------------------------------------------------------------------------|--------------------------------------------------------------------------------------------------------------------------------------------|
| <b>PULSE SEQUENCE</b><br>Relax. delay 1.000 sec<br>Pulse 45.0 degrees<br>Acq. time 1.304 sec<br>Width 25125.6 Hz<br>490 repetitions | <b>OBSERVE</b> c13, 100.5425970<br><b>DECOUPLE</b> H1, 399.8529994<br>Power 42 dB<br>continuously on<br>WALTZ-16 modulated | <b>DATA PROCESSING</b><br>Line broadening 0.5 Hz<br>FT size 65536<br>Total time 18 minutes | RK-ME_-OALL-1B-13c<br><br>Solvent: cdcl3<br>Temp. 25.0 C / 298.1 K<br>Operator: chem<br>File: RK-ME_-OALL-1B-13c<br>Mercury-400 "IITG-NMR" |
|-------------------------------------------------------------------------------------------------------------------------------------|----------------------------------------------------------------------------------------------------------------------------|--------------------------------------------------------------------------------------------|--------------------------------------------------------------------------------------------------------------------------------------------|

HRMS spectra of compound 4s

| Sample Name   | Position    | Instrument Name | User Name              |
|---------------|-------------|-----------------|------------------------|
| Inj Vol       | InjPosition | SampleType      | IRM Calibration Status |
| Data Filename | ACQ Method  | Comment         | Acquired Time          |

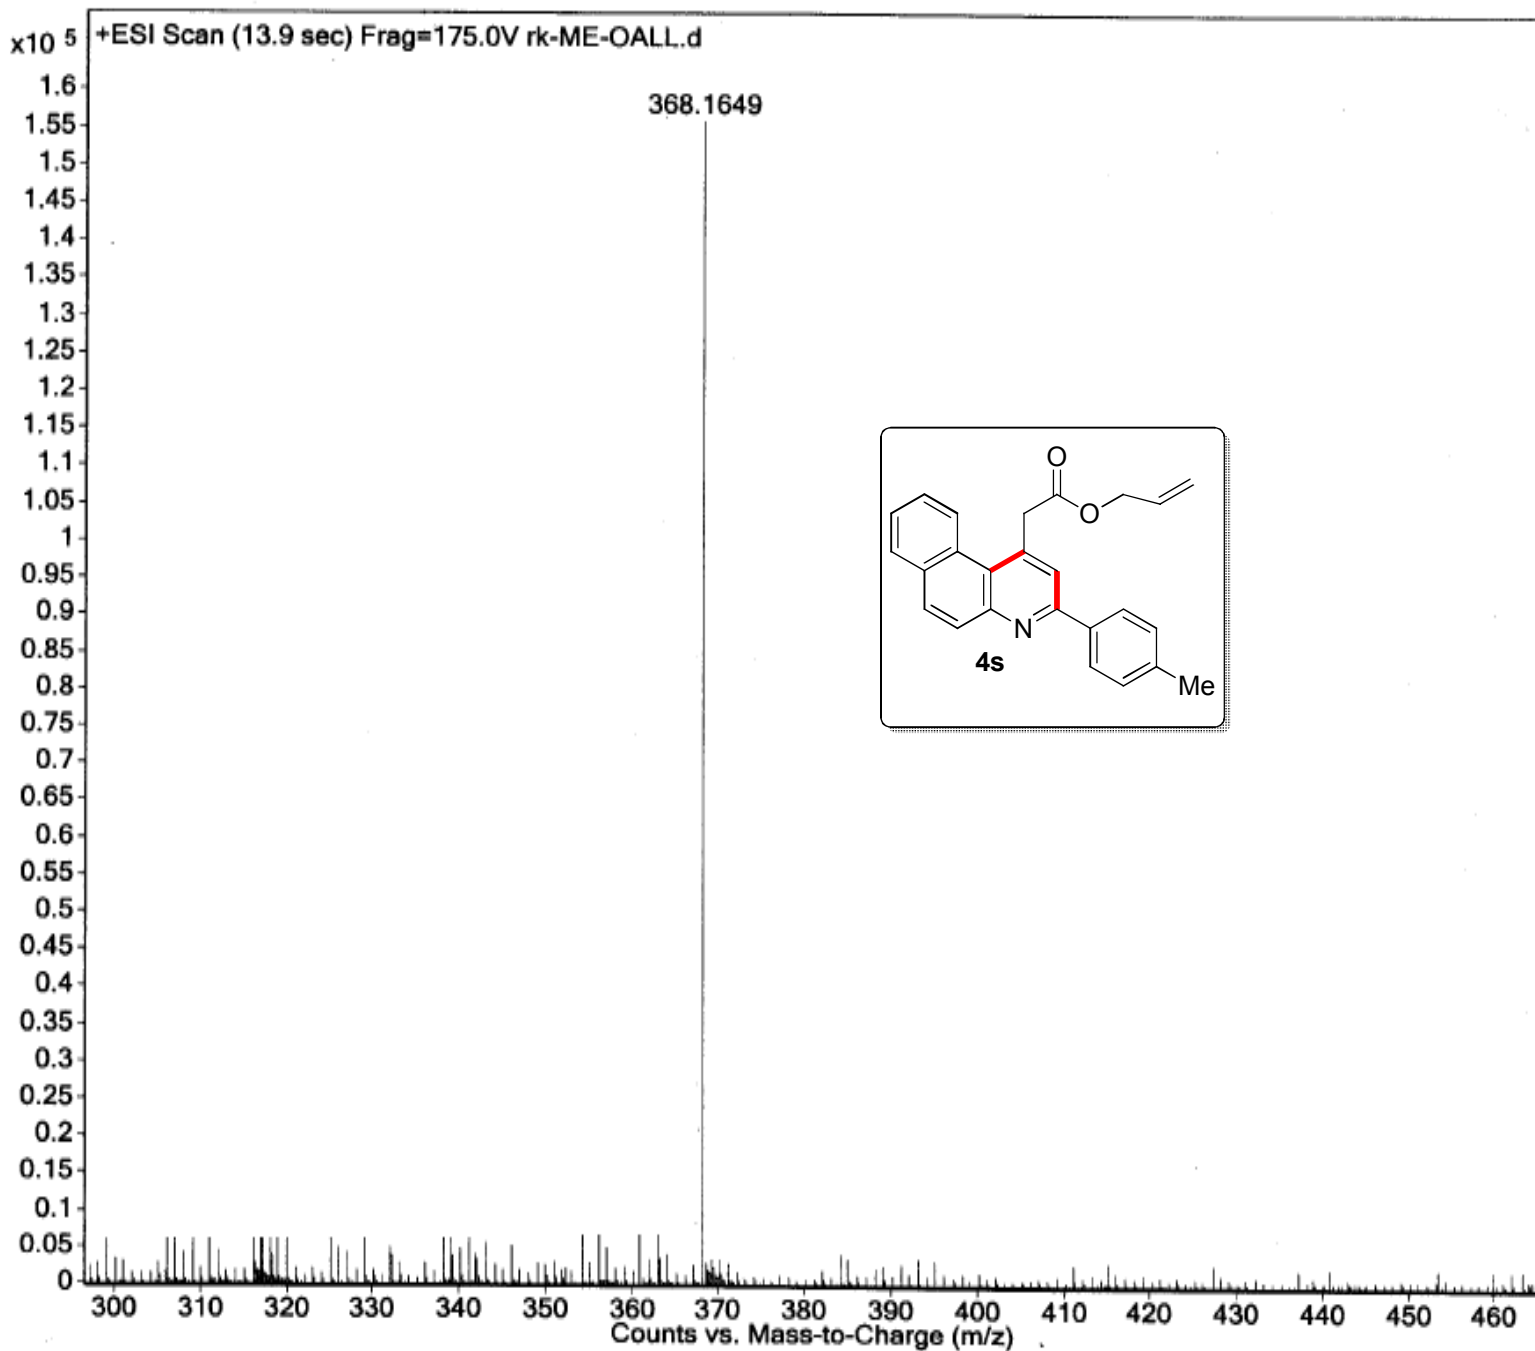

*<sup>1</sup>H NMR spectra of compound 4t*

Current Data Parameters  
NAME NR-4F-QALL-1H  
EXPRO 1  
PROCNO 1

F2 - Acquisition Parameters  
Date\_ 20140929  
Time 16.53  
INSTRUM spect  
PROBHD 5 mm PABBO BB/  
PULPROG zg30  
TD 32768  
SOLVENT CDCl3  
NS 16  
DS 2  
SWH 12019.230 Hz  
FIDRES 0.366798 Hz  
AQ 1.3631488 sec  
RG 65.24  
DM 41.600 usec  
DE 6.50 usec  
TE 297.8 K  
D1 1.00000000 sec  
TDO 1

----- CHANNEL f1 -----  
SF01 600.1737063 MHz  
NUC1 1H  
P1 12.00 usec  
PLW1 21.00000000 W

F2 - Processing parameters  
SI 16384  
SF 600.1700150 MHz  
WDW EM  
SSB 0  
LB 0.30 Hz  
GB 0  
PC 1.00

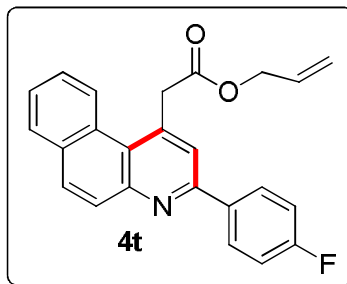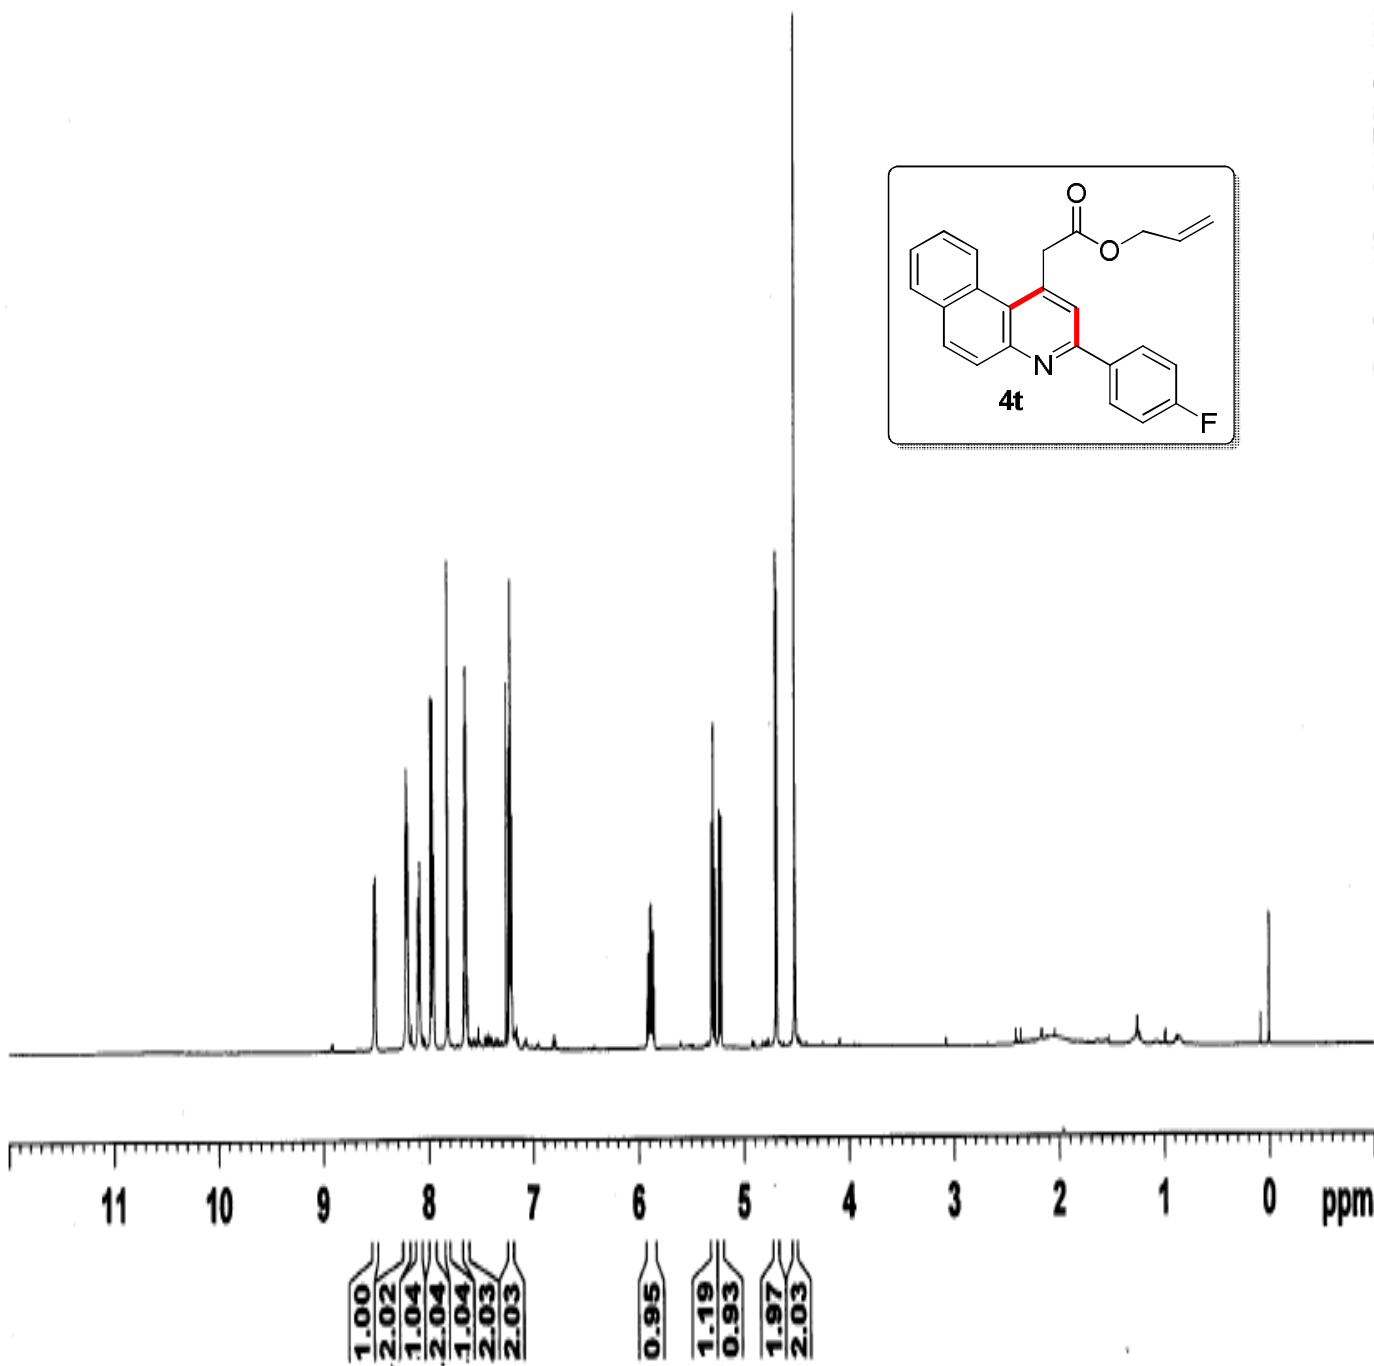

<sup>13</sup>C NMR spectra of compound 4t

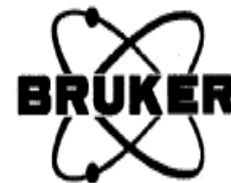

170.33  
164.91  
163.26  
154.61  
150.02  
141.26  
133.17  
131.81  
131.77  
129.81  
129.58  
129.53  
129.50  
129.32  
127.04  
126.95  
126.84  
124.52  
122.88  
119.17  
116.08  
115.94

77.44  
77.23  
77.01

66.29

43.81

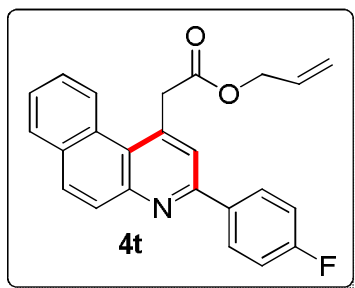

Current Data Parameters  
NAME RK-4F-QALL 13C  
EXPNO 1  
PROCNO 1

F2 - Acquisition Parameters  
Date 20141001  
Time 11.19  
INSTRUM spect  
PROBHD 5 mm PABBO BB/  
PULPROG zgpg30  
TD 32768  
SOLVENT CDCl3  
NS 108  
DS 2  
SWH 36057.691 Hz  
FIDRES 1.100393 Hz  
AQ 0.4543829 sec  
RG 65.24  
DW 13.867 usec  
DE 6.50 usec  
TE 299.6 K  
D1 2.00000000 sec  
D11 0.03000000 sec  
TDO 1

----- CHANNEL f1 -----  
SFO1 150.9279571 MHz  
NUC1 13C  
P1 10.50 usec  
PLW1 95.00000000 W

----- CHANNEL f2 -----  
SFO2 600.1724007 MHz  
NUC2 1H  
CPDPRG2 waltz16  
PCPD2 70.00 usec  
PLW2 21.00000000 W  
PLW12 0.61714000 W  
PLW13 0.30239999 W

F2 - Processing parameters  
SI 16384  
SF 150.9128392 MHz  
MDW EM  
SBB 0  
LB 1.00 Hz  
GB 0  
PC 1.40

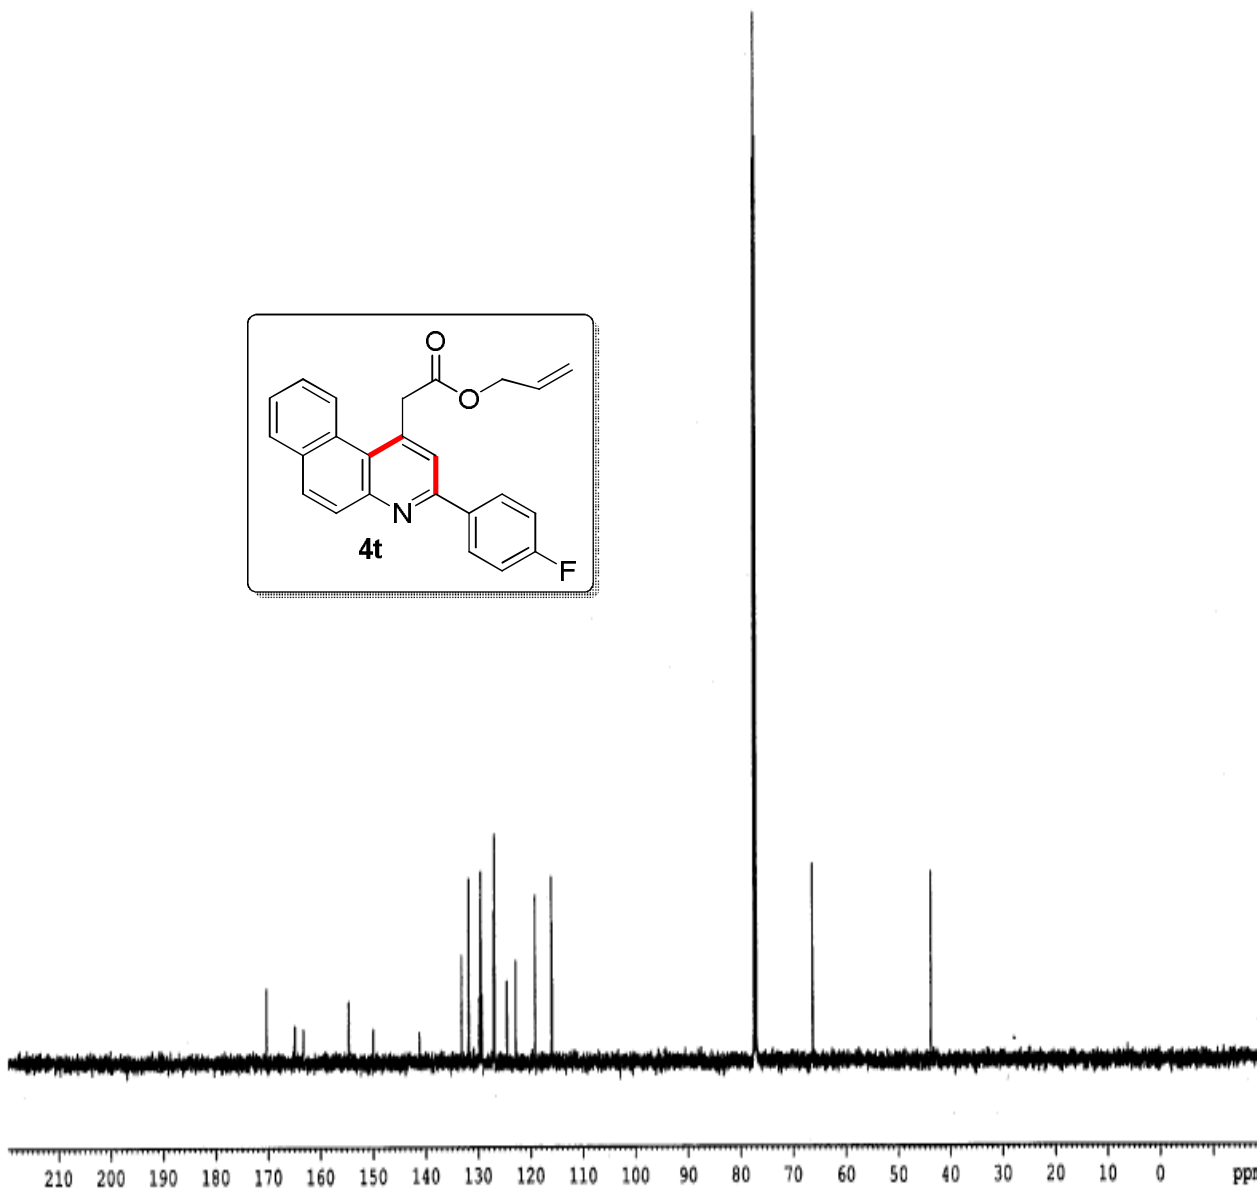

*HRMS spectra of compound 4t*

|               |              |             |        |                 |              |                        |                       |
|---------------|--------------|-------------|--------|-----------------|--------------|------------------------|-----------------------|
| Sample Name   | RK-4F-OALL   | Position    | Vial 1 | Instrument Name | Instrument 1 | User Name              |                       |
| Inj Vol       | -10          | InjPosition |        | SampleType      | Sample       | IRM Calibration Status | Success               |
| Data Filename | RK-4F-OALL.d | ACQ Method  |        | Comment         |              | Acquired Time          | 12/4/2014 11:55:49 AM |

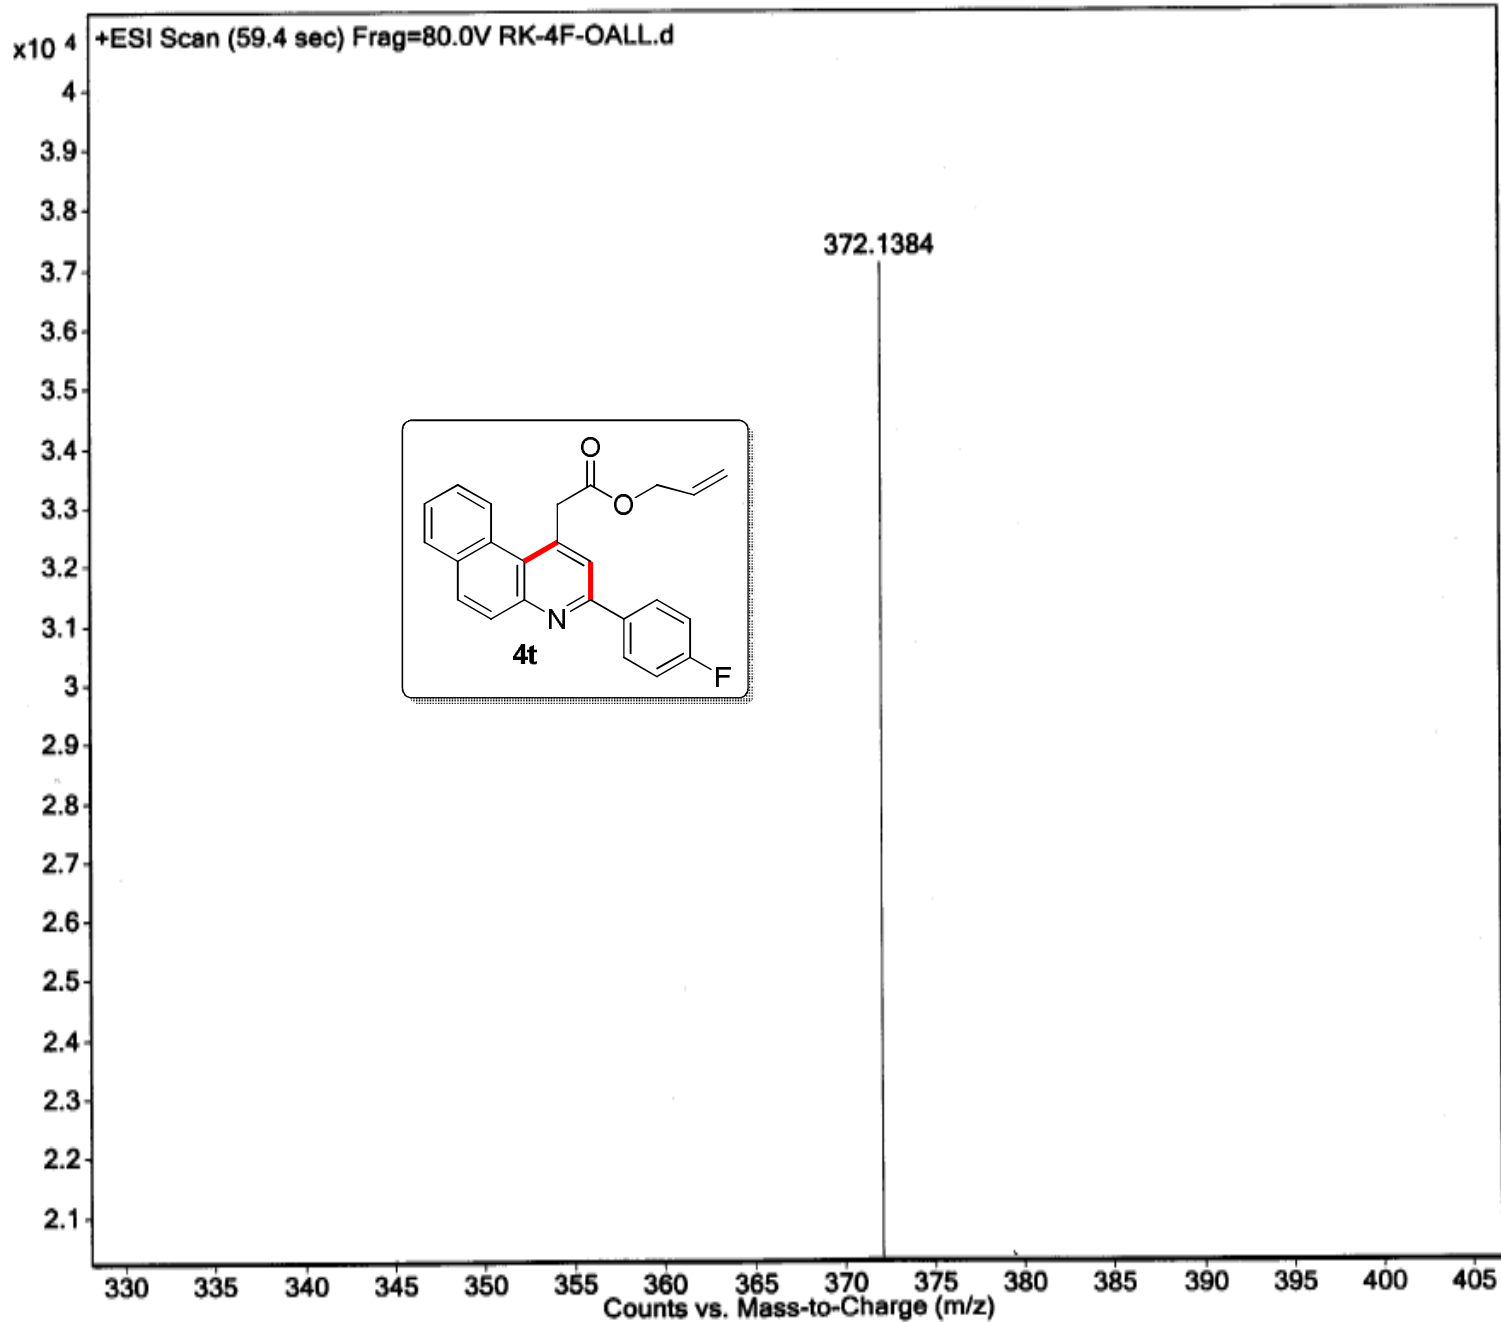

# *<sup>1</sup>H NMR spectra of compound 4u*

RK-OMe-OALL-1H

Sample Name:

RK-OMe-OALL-1H

Data Collected on:

IITG-NMR-mercury400

Archive directory:

/export/home/chempack/vnmrsys/data

Sample directory:

FidFile: RK-OMe-OALL-1H

Pulse Sequence: PROTON (s2pul)

Solvent: cdcl3

Data collected on: Sep 19 2014

Temp. 25.0 C / 298.1 K

Operator: chem

Relax. delay 1.000 sec

Pulse 45.0 degrees

Acq. time 2.561 sec

Width 6390.0 Hz

32 repetitions

OBSERVE H1, 399.8511332 MHz

DATA PROCESSING

FT size 32768

Total time 2 min 4 sec

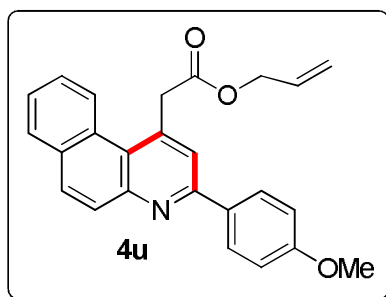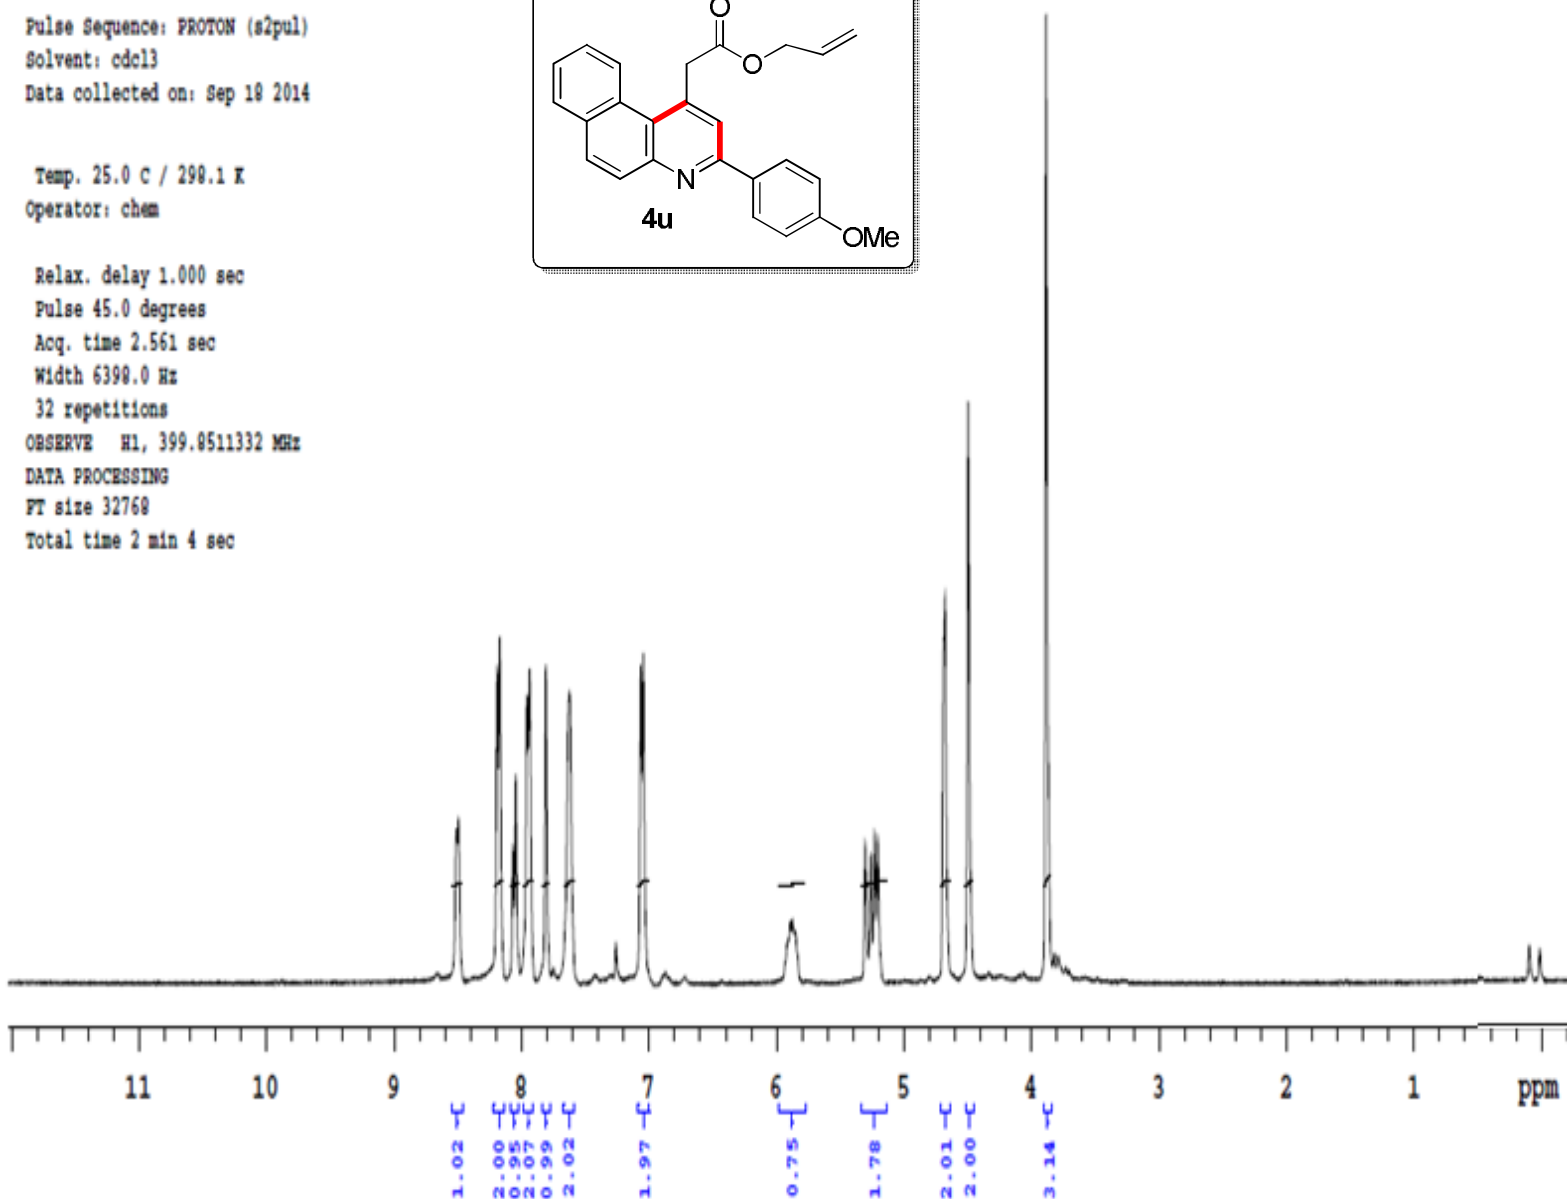

*<sup>13</sup>C NMR spectra of compound 4u*

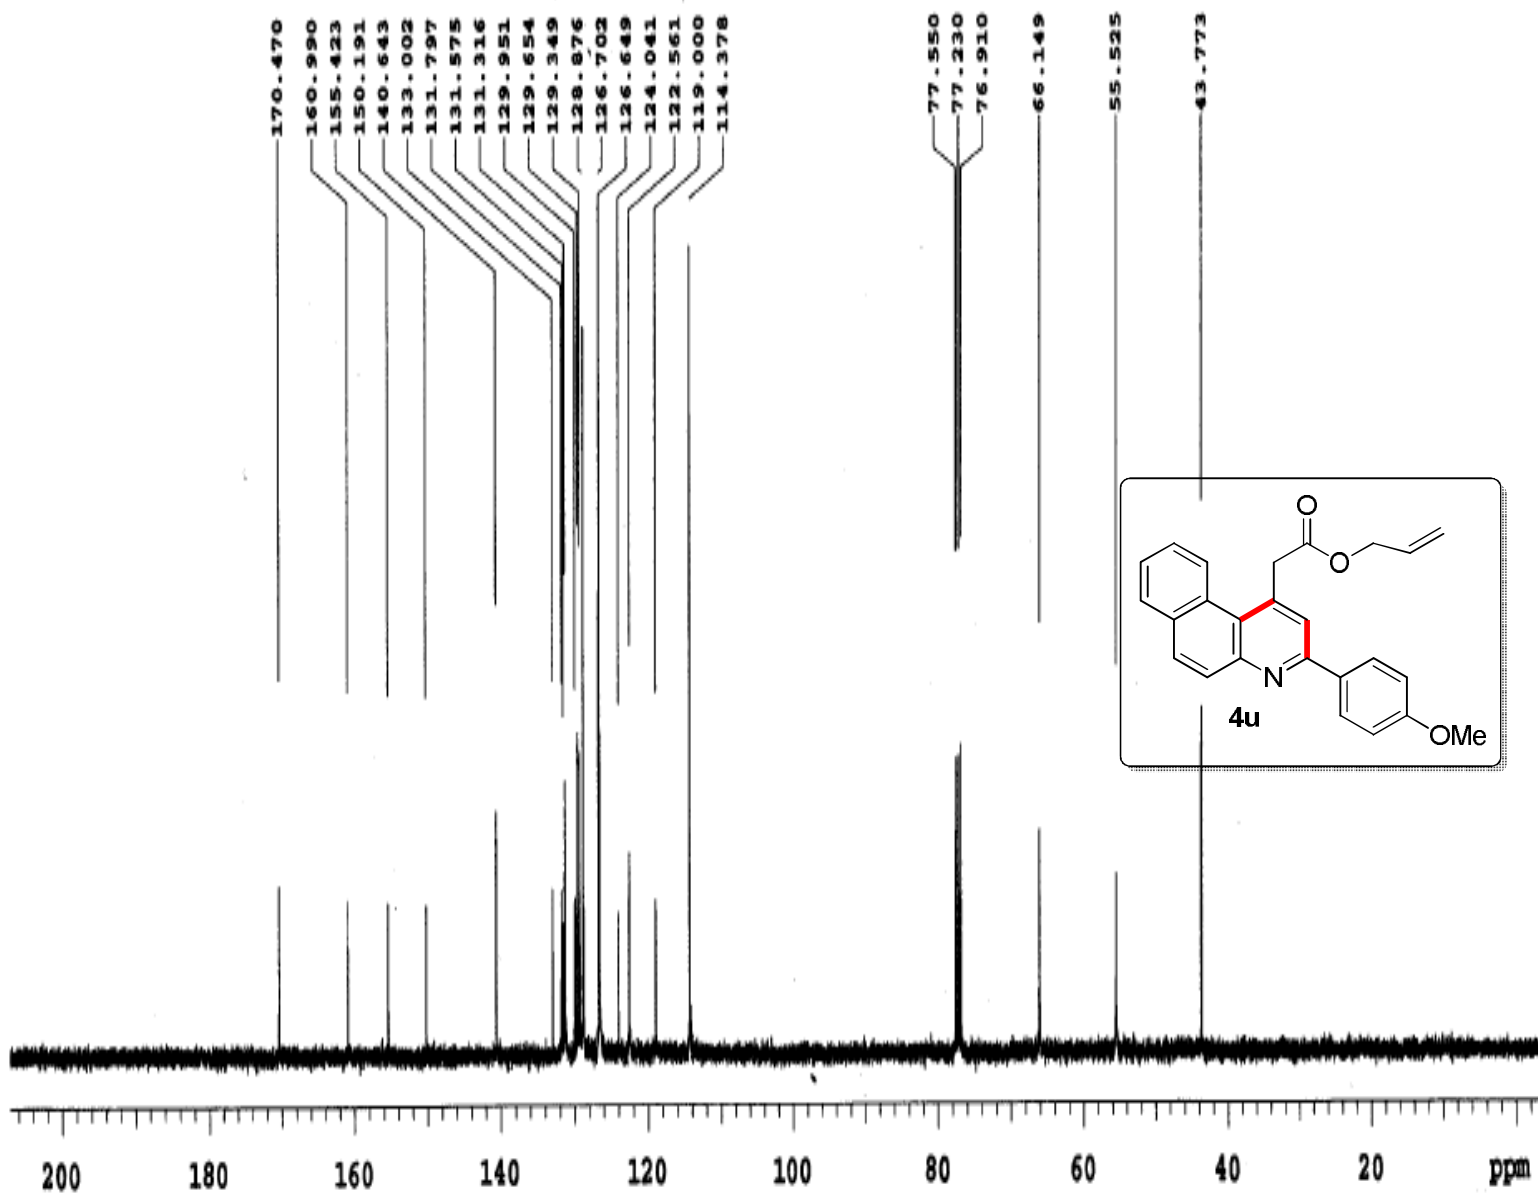

|                                                                                                                                                                                                                                      |                                                                                                                                                                                           |                                                                                                                                                         |                                                                                                                                                                                                                                              |
|--------------------------------------------------------------------------------------------------------------------------------------------------------------------------------------------------------------------------------------|-------------------------------------------------------------------------------------------------------------------------------------------------------------------------------------------|---------------------------------------------------------------------------------------------------------------------------------------------------------|----------------------------------------------------------------------------------------------------------------------------------------------------------------------------------------------------------------------------------------------|
| <p><b>PULSE SEQUENCE</b><br/>                 Relax. delay 1.000 sec<br/>                 Pulse 45.0 degrees<br/>                 Acq. time 1.304 sec<br/>                 Width 25125.6 Hz<br/>                 550 repetitions</p> | <p><b>OBSERVE</b> c13, 100.5425901<br/> <b>DECOUPLE</b> H1, 399.8529994<br/>                 Power 42 dB<br/>                 continuously on<br/>                 WALTZ-16 modulated</p> | <p><b>DATA PROCESSING</b><br/>                 Line broadening 0.5 Hz<br/>                 FT size 65536<br/>                 Total time 21 minutes</p> | <p><b>RK-4-OMe-QALL-13C</b><br/>                 Solvent: cdcl3<br/>                 Temp. 25.0 C / 298.1 K<br/>                 Operator: chem<br/>                 File: RK-4-OMe-QALL-13C<br/>                 Mercury-400 *IITG-NMR*</p> |
|--------------------------------------------------------------------------------------------------------------------------------------------------------------------------------------------------------------------------------------|-------------------------------------------------------------------------------------------------------------------------------------------------------------------------------------------|---------------------------------------------------------------------------------------------------------------------------------------------------------|----------------------------------------------------------------------------------------------------------------------------------------------------------------------------------------------------------------------------------------------|



HRMS spectra of compound 4u

| Sample Name   | Position    | Instrument Name | User Name              |
|---------------|-------------|-----------------|------------------------|
| Inj Vol       | InjPosition | SampleType      | IRM Calibration Status |
| Data Filename | ACQ Method  | Comment         | Acquired Time          |

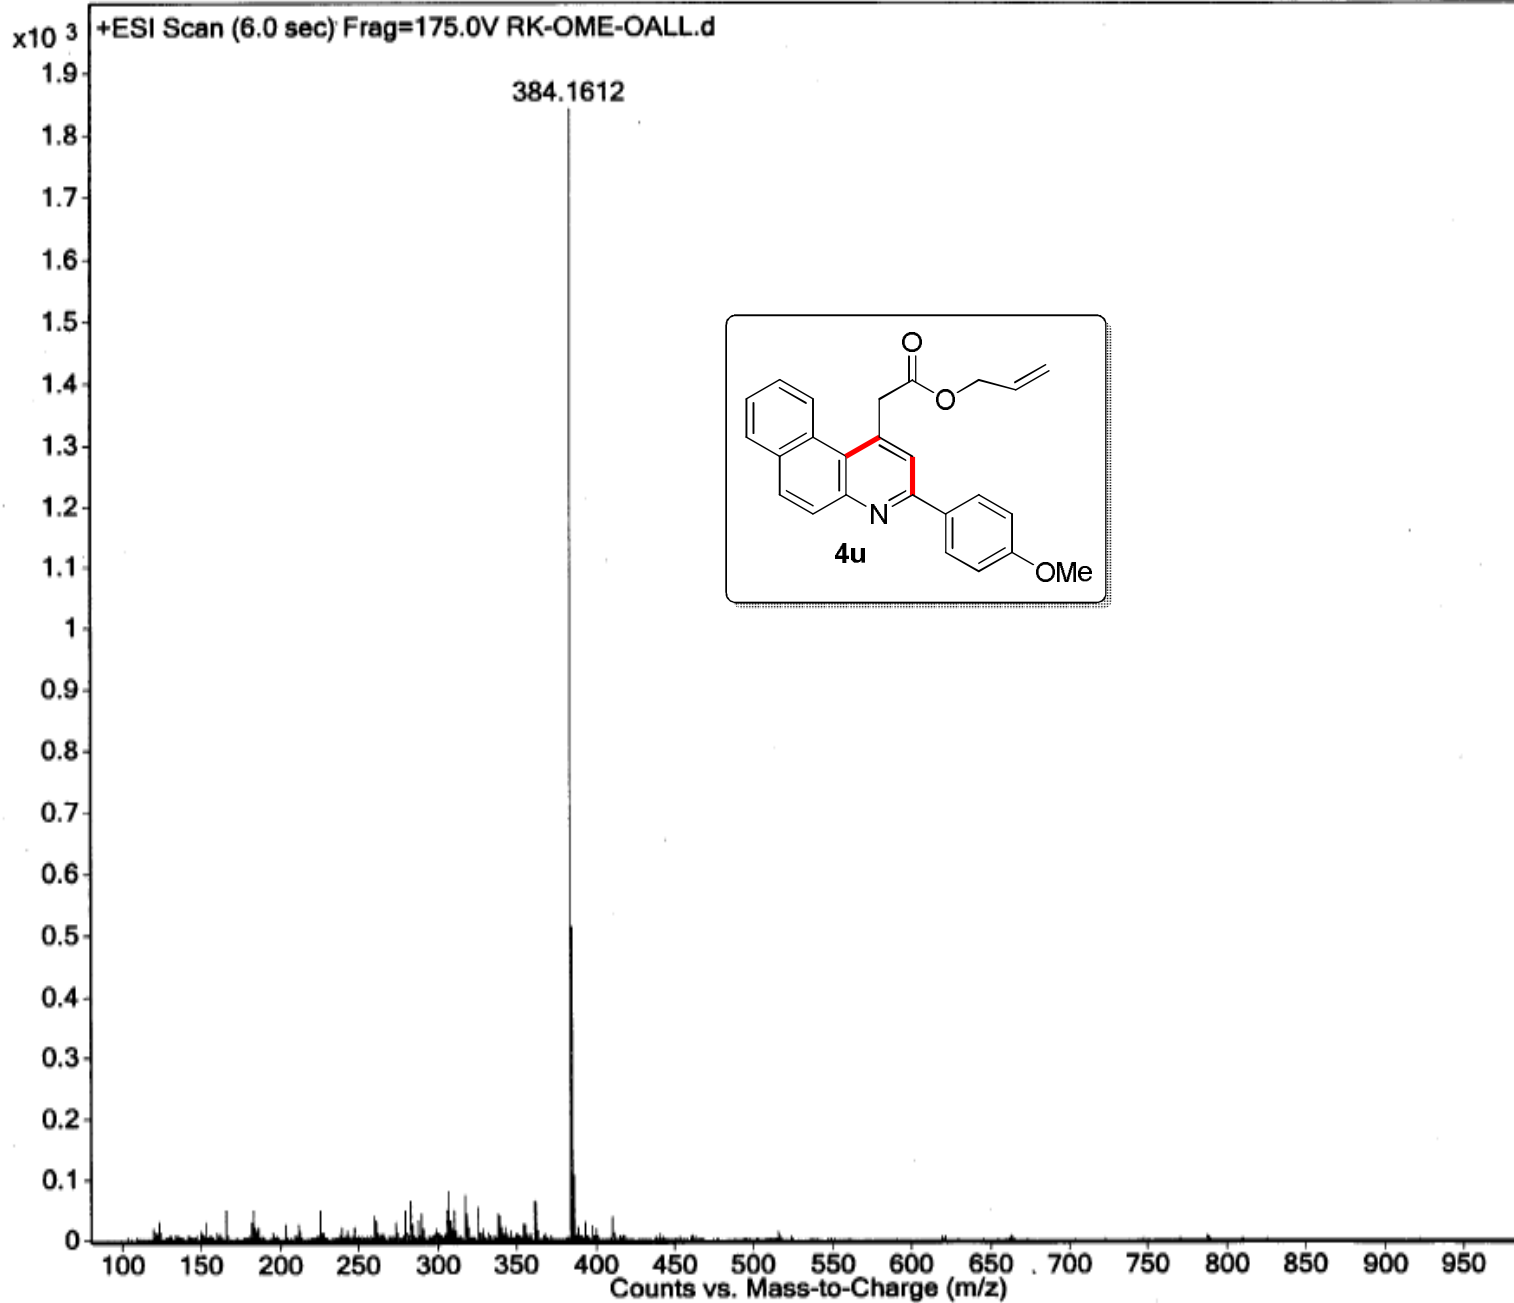

*<sup>1</sup>H NMR spectra of compound 7a*

EK-NAP-NAP-OET-1H

exp2 PROTON

| SAMPLE      |             | PRESATURATION |            |
|-------------|-------------|---------------|------------|
| date        | Oct 20 2014 | satmode       | n          |
| solvent     | cdcl3       | wet           | n          |
| file        | exp         | SPECIAL       |            |
| ACQUISITION |             | temp          | 25.0       |
| sw          | 6398.0      | gain          | 30         |
| at          | 2.561       | spin          | not used   |
| np          | 32768       | hst           | 0.008      |
| fb          | 3600        | pw90          | 16.300     |
| bs          | 4           | alfa          | 10.000     |
| dl          | 1.000       | FLAGS         |            |
| nt          | 32          | il            | n          |
| ct          | 32          | in            | n          |
| TRANSMITTER |             | dp            | y          |
| tn          | H1          | hs            | nn         |
| sfrq        |             | 399.853       | PROCESSING |
| tof         | 363.1       | fn            | not used   |
| tpwr        | 58          | DISPLAY       |            |
| pw          | 8.150       | sp            | -219.1     |
| DECOUPLER   |             | wp            | 4806.7     |
| dn          | c13         | rfl           | 3703.1     |
| dof         | 0           | rpf           | 2902.9     |
| dm          | nnn         | rp            | 132.8      |
| decwave     | g           | lp            | -102.6     |
| dpwr        | 40          | PLOT          |            |
| dmf         | 17100       | wc            | 268        |
|             |             | sc            | 0          |
|             |             | vs            | 77         |
|             |             | th            | 48         |
|             |             | ai            | cdc ph     |

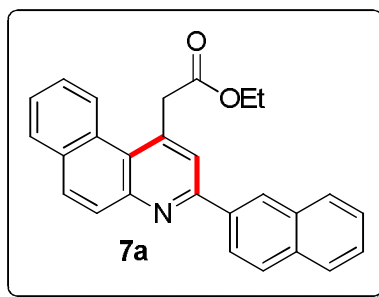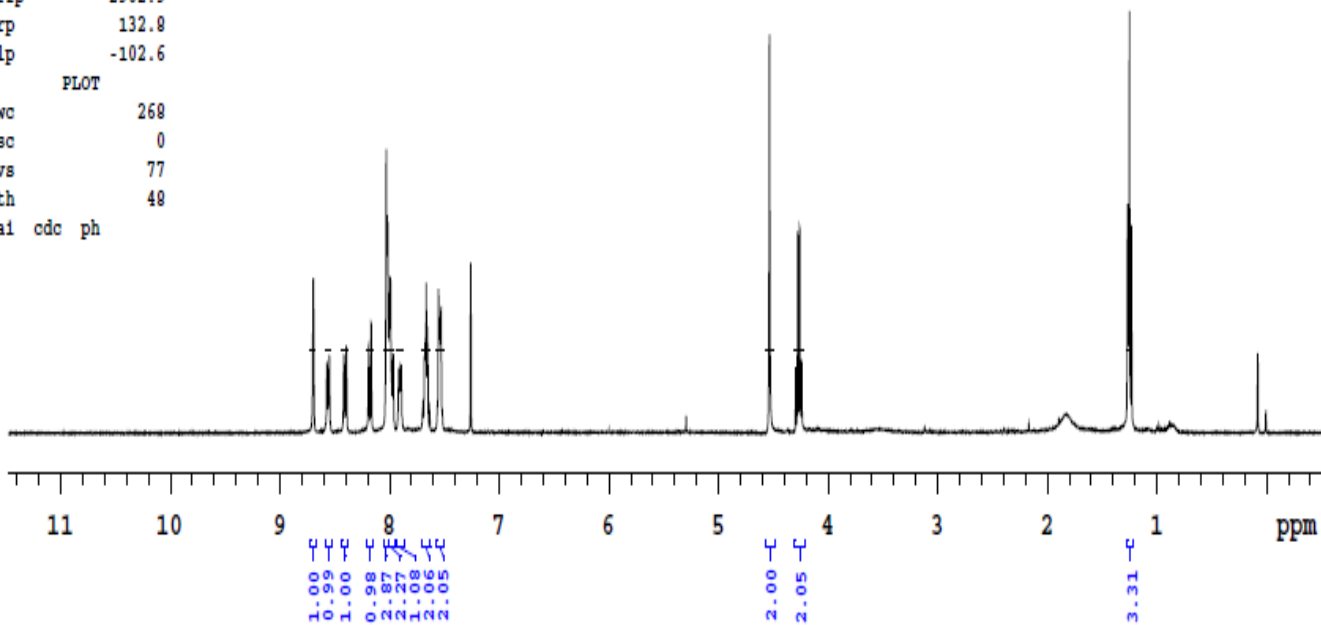

*<sup>13</sup>C NMR spectra of compound 7a*

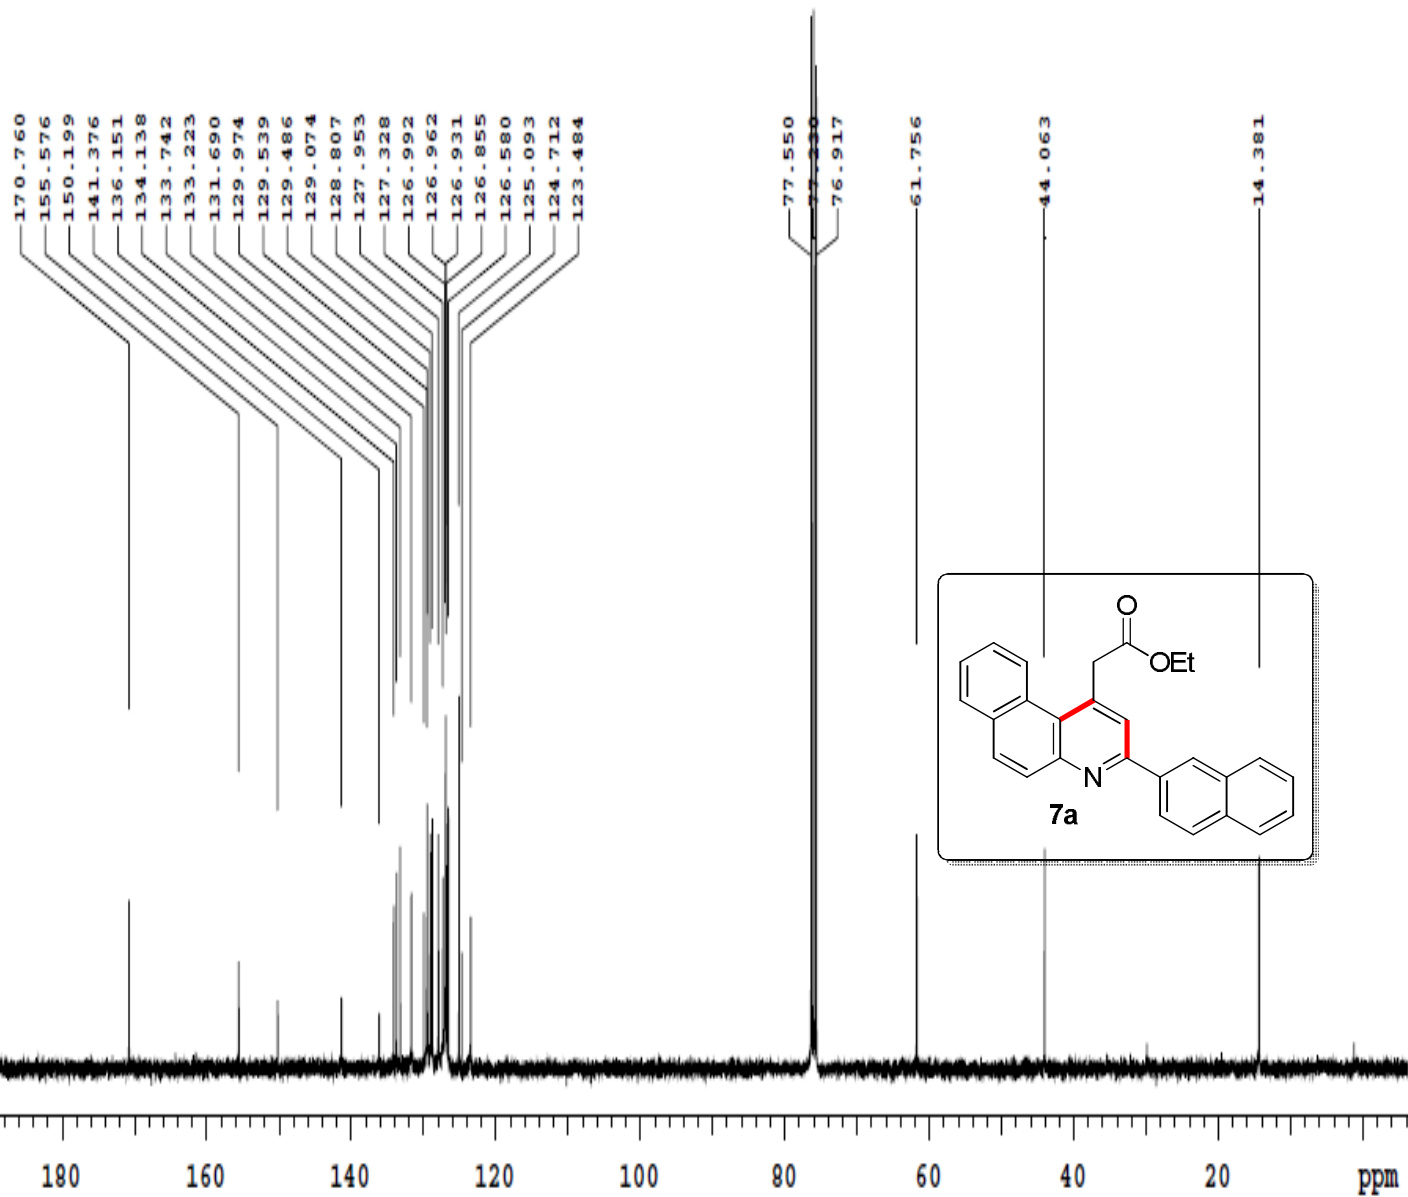

|                                                                                                                                      |                                                                                                                            |                                                                                           |                                                                                                                   |
|--------------------------------------------------------------------------------------------------------------------------------------|----------------------------------------------------------------------------------------------------------------------------|-------------------------------------------------------------------------------------------|-------------------------------------------------------------------------------------------------------------------|
| <b>PULSE SEQUENCE</b><br>Relax. delay 1.000 sec<br>Pulse 45.0 degrees<br>Acq. time 1.304 sec<br>Width 25125.6 Hz<br>6700 repetitions | <b>OBSERVE</b> C13, 100.5425932<br><b>DECOUPLE</b> H1, 399.8529994<br>Power 42 dB<br>continuously on<br>WALTZ-16 modulated | <b>DATA PROCESSING</b><br>Line broadening 0.5 Hz<br>FT size 65536<br>Total time 4.3 hours | <b>RK-NAP-NAP-OET-13C</b><br>Solvent: cdcl3<br>Temp. 25.0 C / 298.1 K<br>Operator: chem<br>Mercury-400 "IITG-NMR" |
|--------------------------------------------------------------------------------------------------------------------------------------|----------------------------------------------------------------------------------------------------------------------------|-------------------------------------------------------------------------------------------|-------------------------------------------------------------------------------------------------------------------|

*HRMS spectra of compound 7a*

|               |             |             |    |                 |              |                        |                        |
|---------------|-------------|-------------|----|-----------------|--------------|------------------------|------------------------|
| Sample Name   | RK-NAP-ET   | Position    | -1 | Instrument Name | Instrument 1 | User Name              |                        |
| Inj Vol       | -10         | InjPosition |    | SampleType      | Sample       | IRM Calibration Status | Success                |
| Data Filename | RK-NAP-ET.d | ACQ Method  |    | Comment         |              | Acquired Time          | 10/30/2014 11:50:24 AM |

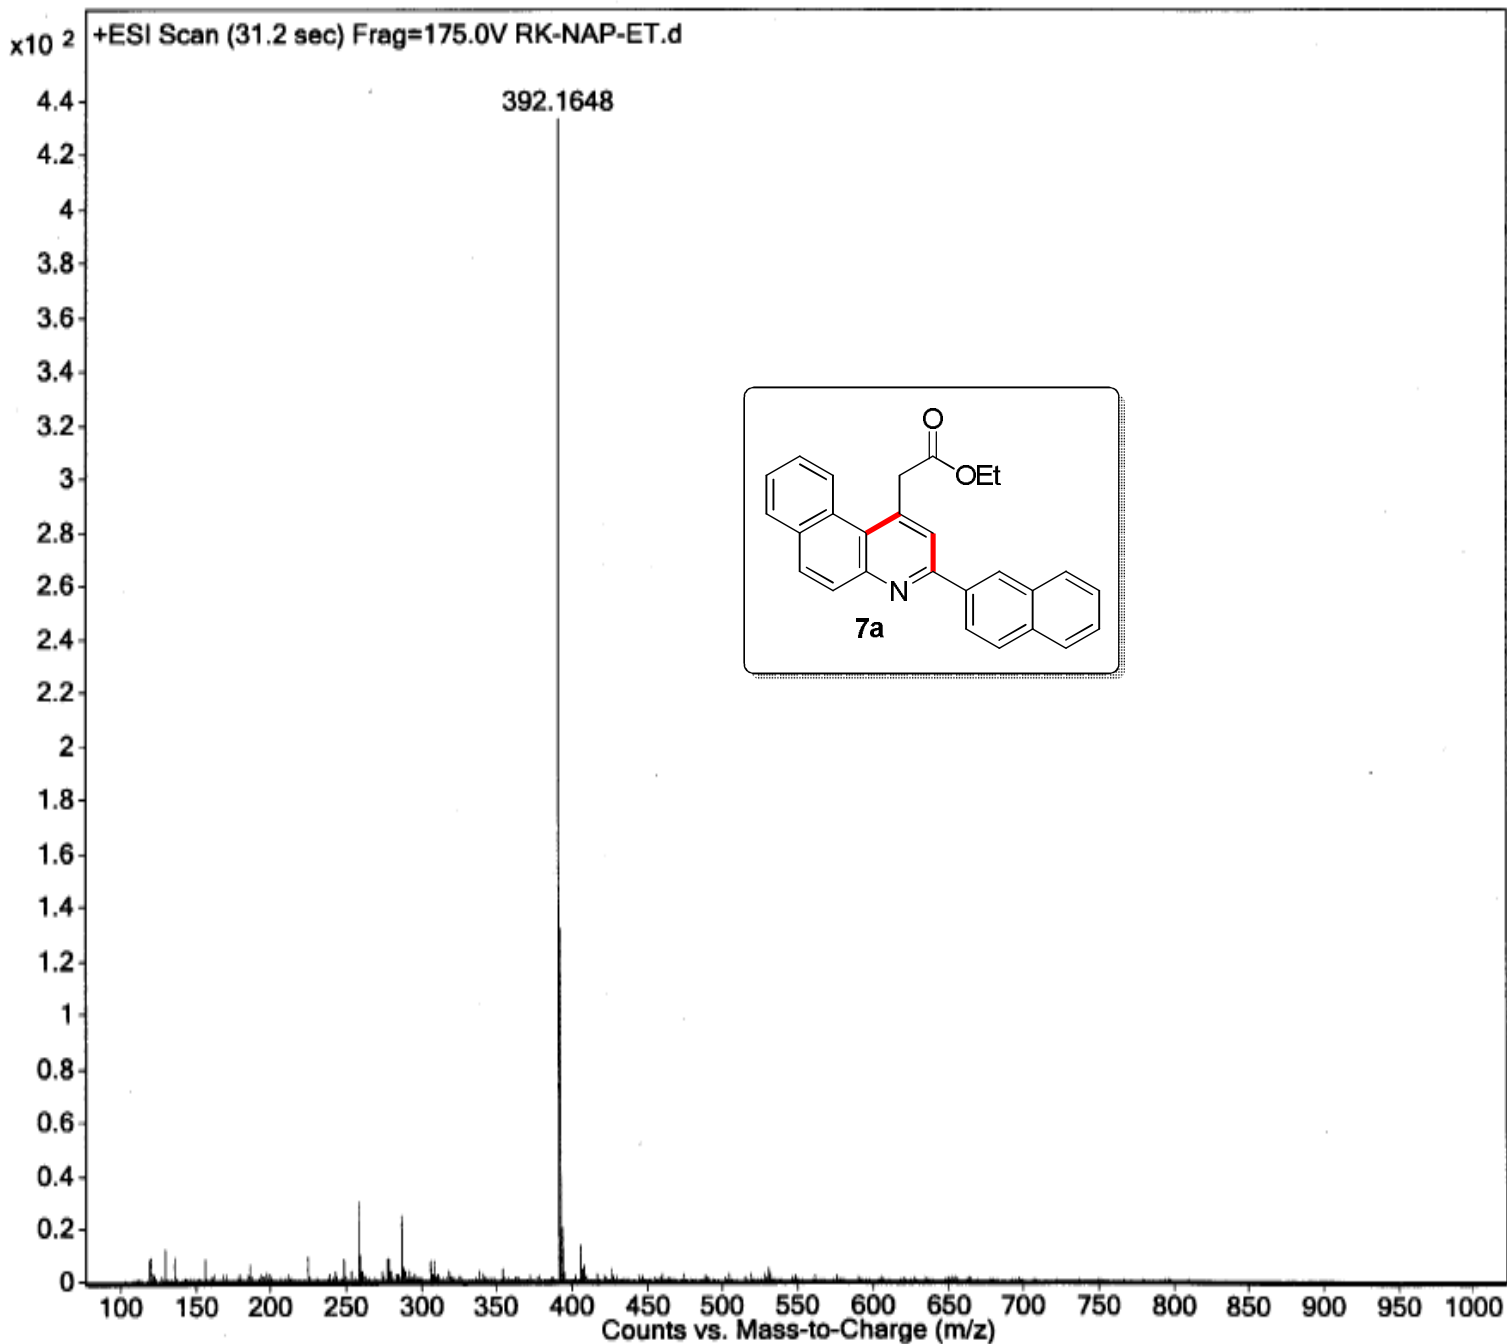

*<sup>1</sup>H NMR spectra of compound 7b*

Current Data Parameters  
NAME BK-MAP-OMe-1H  
EXPNO 1  
PROCNO 1

F2 - Acquisition Parameters  
Date\_ 20141010  
Time 10.27  
INSTRUM spect  
PROBHD 5 mm F400 BBO/  
PULPROG zg30  
TD 32768  
SOLVENT CDCl3  
NS 16  
DS 2  
SWH 12019.230 Hz  
FIDRES 0.366798 Hz  
AQ 1.3631488 sec  
RG 33.2  
IN 41.620 usec  
DE 6.30 usec  
TE 299.0 K  
DI 1.0000000 sec  
TDO 1

===== CHANNEL f1 =====  
SF01 600.137063 MHz  
NUC1 1H  
P1 12.00 usec  
PLW1 21.0000000 W

F2 - Processing parameters  
SI 16384  
SF 600.137063 MHz  
WDW EM  
SSB 0  
LB 0.30 Hz  
GB 0  
PC 1.00

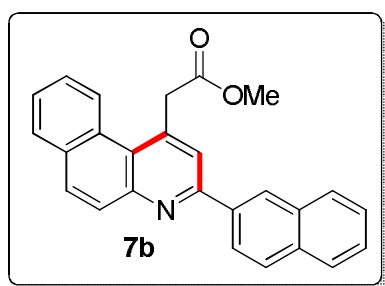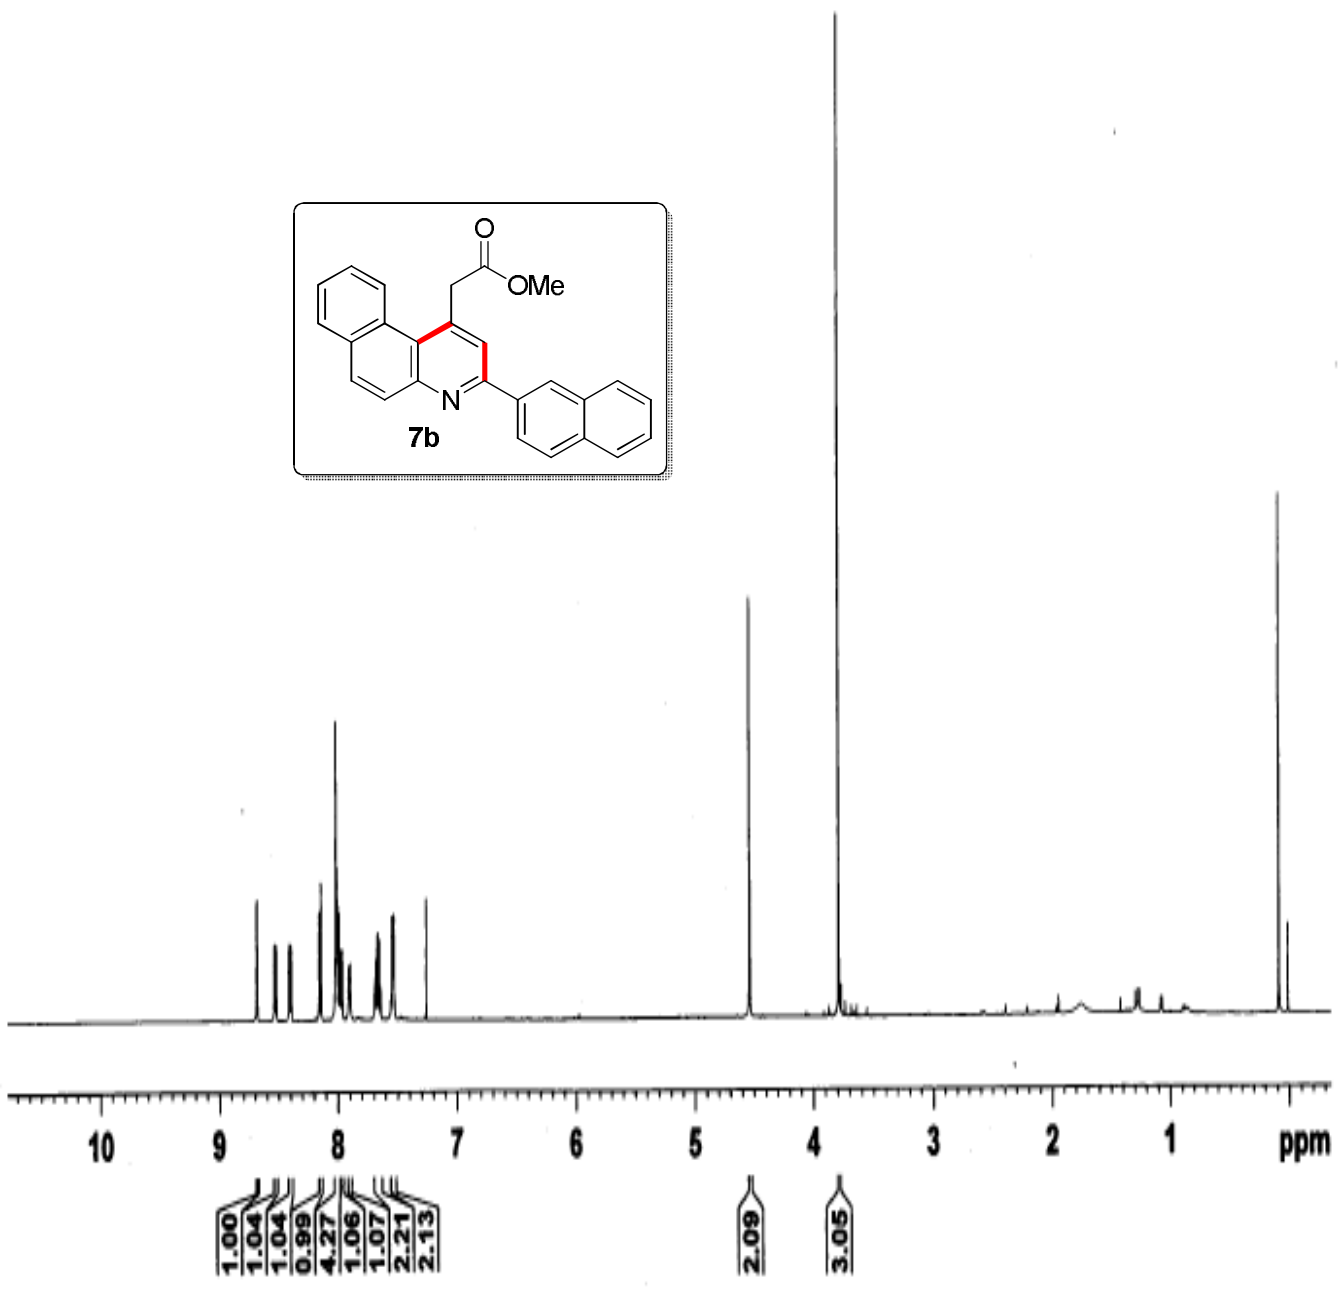

*<sup>13</sup>C NMR spectra of compound 7b*

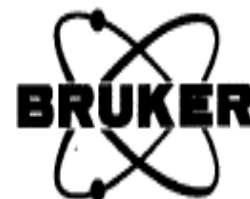

171.29  
155.64  
150.34  
141.00  
136.26  
134.11  
133.73  
133.23  
131.63  
129.93  
129.67  
129.48  
128.04  
128.78  
127.94  
127.23  
126.97  
126.93  
126.89  
126.81  
125.56  
124.08  
123.63  
123.43

77.43  
77.22  
77.01

52.83

43.76

Current Data Parameters  
NAME RK-NAP-OMe-13C  
EXPNO 1  
PROCNO 1

F2 - Acquisition Parameters  
Date\_ 20141010  
Time 10.33  
INSTRUM spect  
PROBHD 5 mm PABBO BB/  
PULPROG zgpg30  
TD 32768  
SOLVENT CDCl3  
NS 184  
DS 2  
SWH 36057.691 Hz  
FIDRES 1.100393 Hz  
AQ 0.4543829 sec  
RG 65.24  
DW 13.867 usec  
DE 6.50 usec  
TE 299.8 K  
D1 2.00000000 sec  
D11 0.03000000 sec  
TDO 1

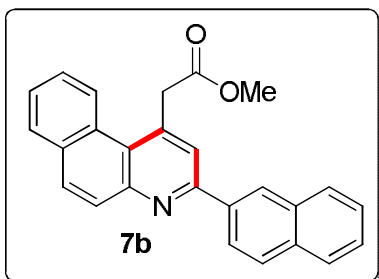

----- CHANNEL f1 -----  
SFO1 150.9279571 MHz  
NUC1 13C  
P1 10.50 usec  
PLW1 95.00000000 W

----- CHANNEL f2 -----  
SFO2 600.1724007 MHz  
NUC2 1H  
CPDPRG12 walzr16  
PCPD2 70.00 usec  
PLW2 21.00000000 W  
PLW12 0.61714000 W  
PLW13 0.30239999 W

F2 - Processing parameters  
SI 16384  
SF 150.9128391 MHz  
WDW EM  
SSB 0  
LB 1.00 Hz  
GB 0  
PC 1.40

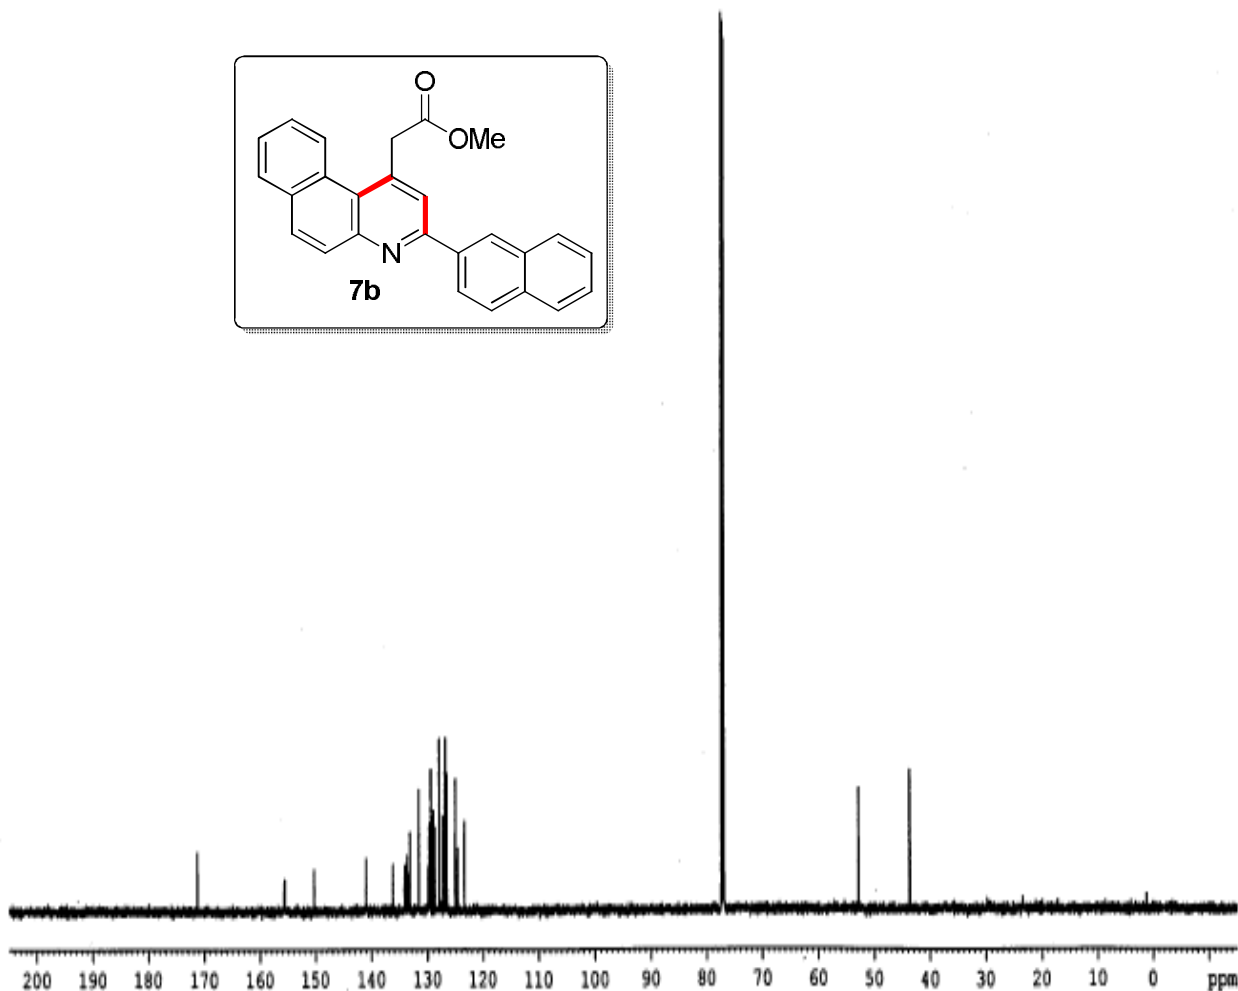

*HRMS spectra of compound 7b*

|               |              |             |    |                 |              |                        |                        |
|---------------|--------------|-------------|----|-----------------|--------------|------------------------|------------------------|
| Sample Name   | RK-NAP-OME   | Position    | -1 | Instrument Name | Instrument 1 | User Name              |                        |
| Inj Vol       | -10          | InjPosition |    | SampleType      | Sample       | IRM Calibration Status | Success                |
| Data Filename | RK-NAP-OME.d | ACQ Method  |    | Comment         |              | Acquired Time          | 10/15/2014 12:25:35 PM |

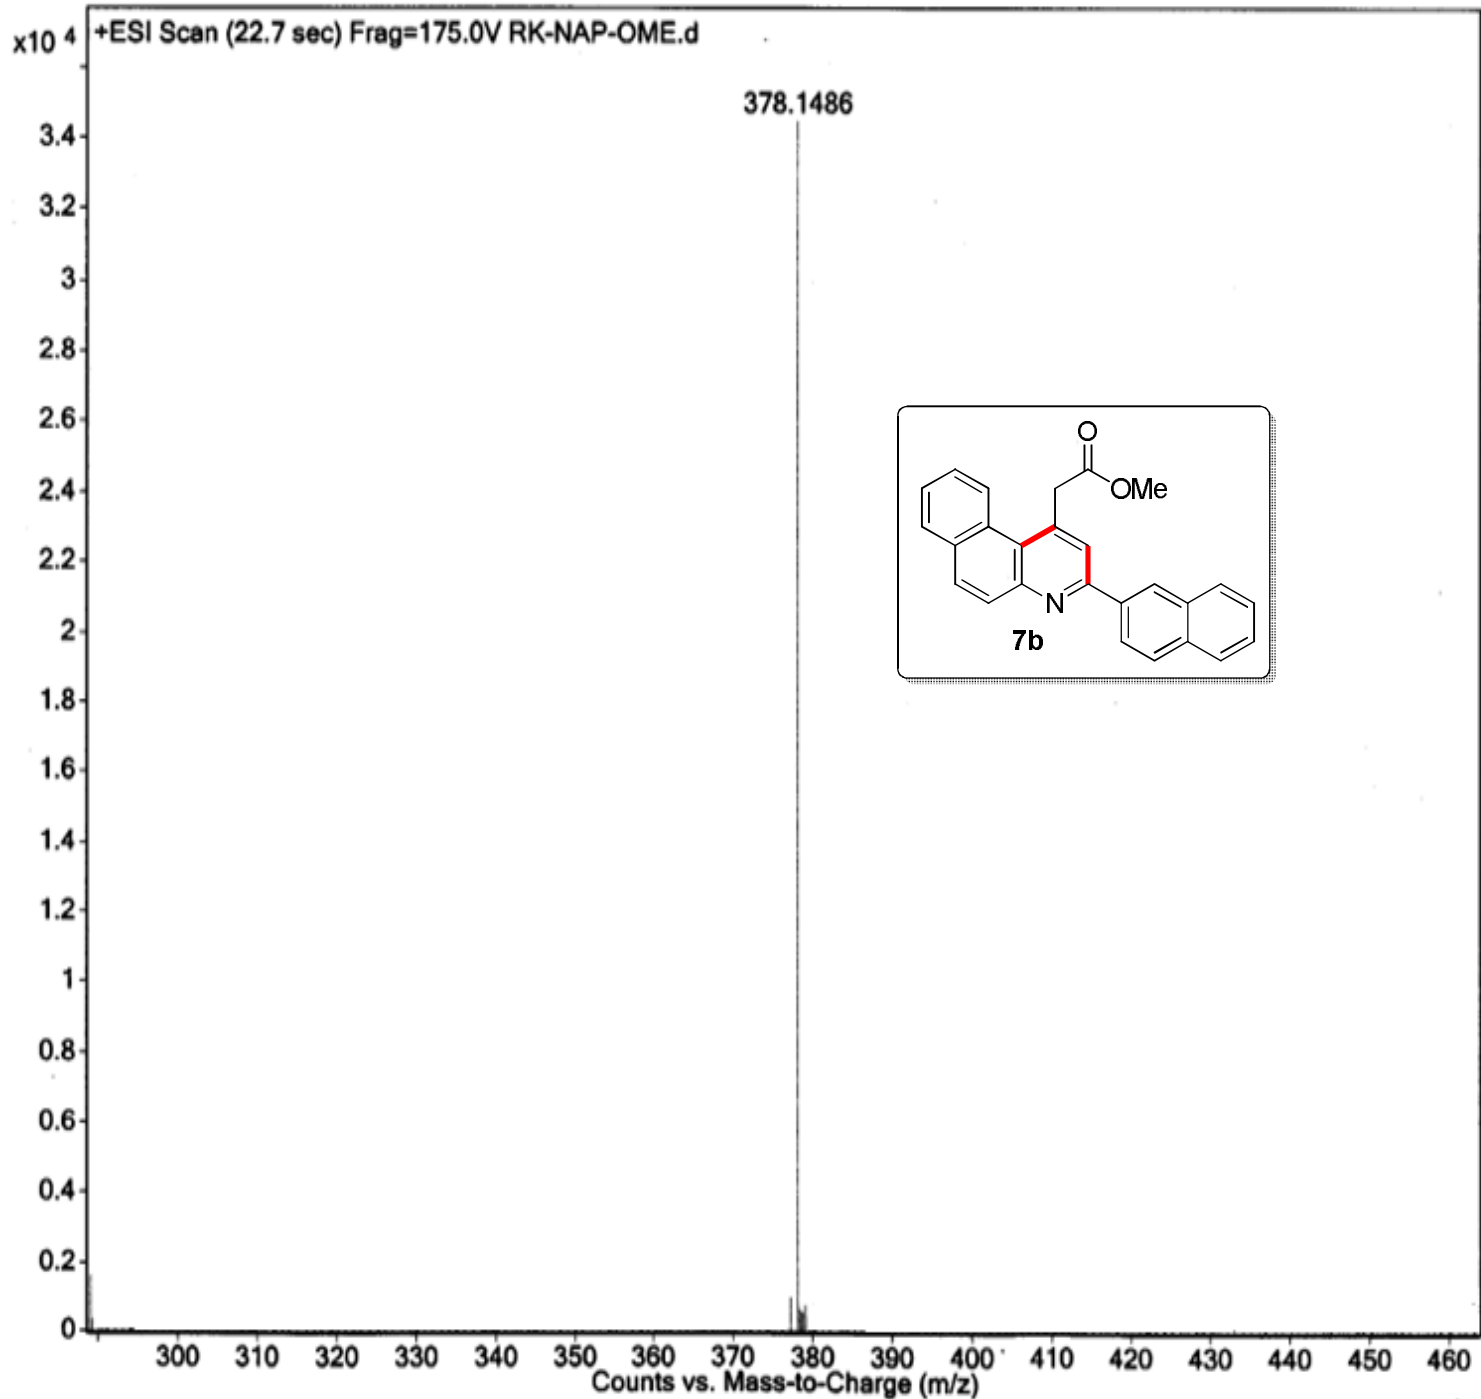





*<sup>13</sup>C NMR spectra of compound 10*

RK-TRi-Bn-OA11-13C

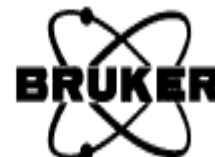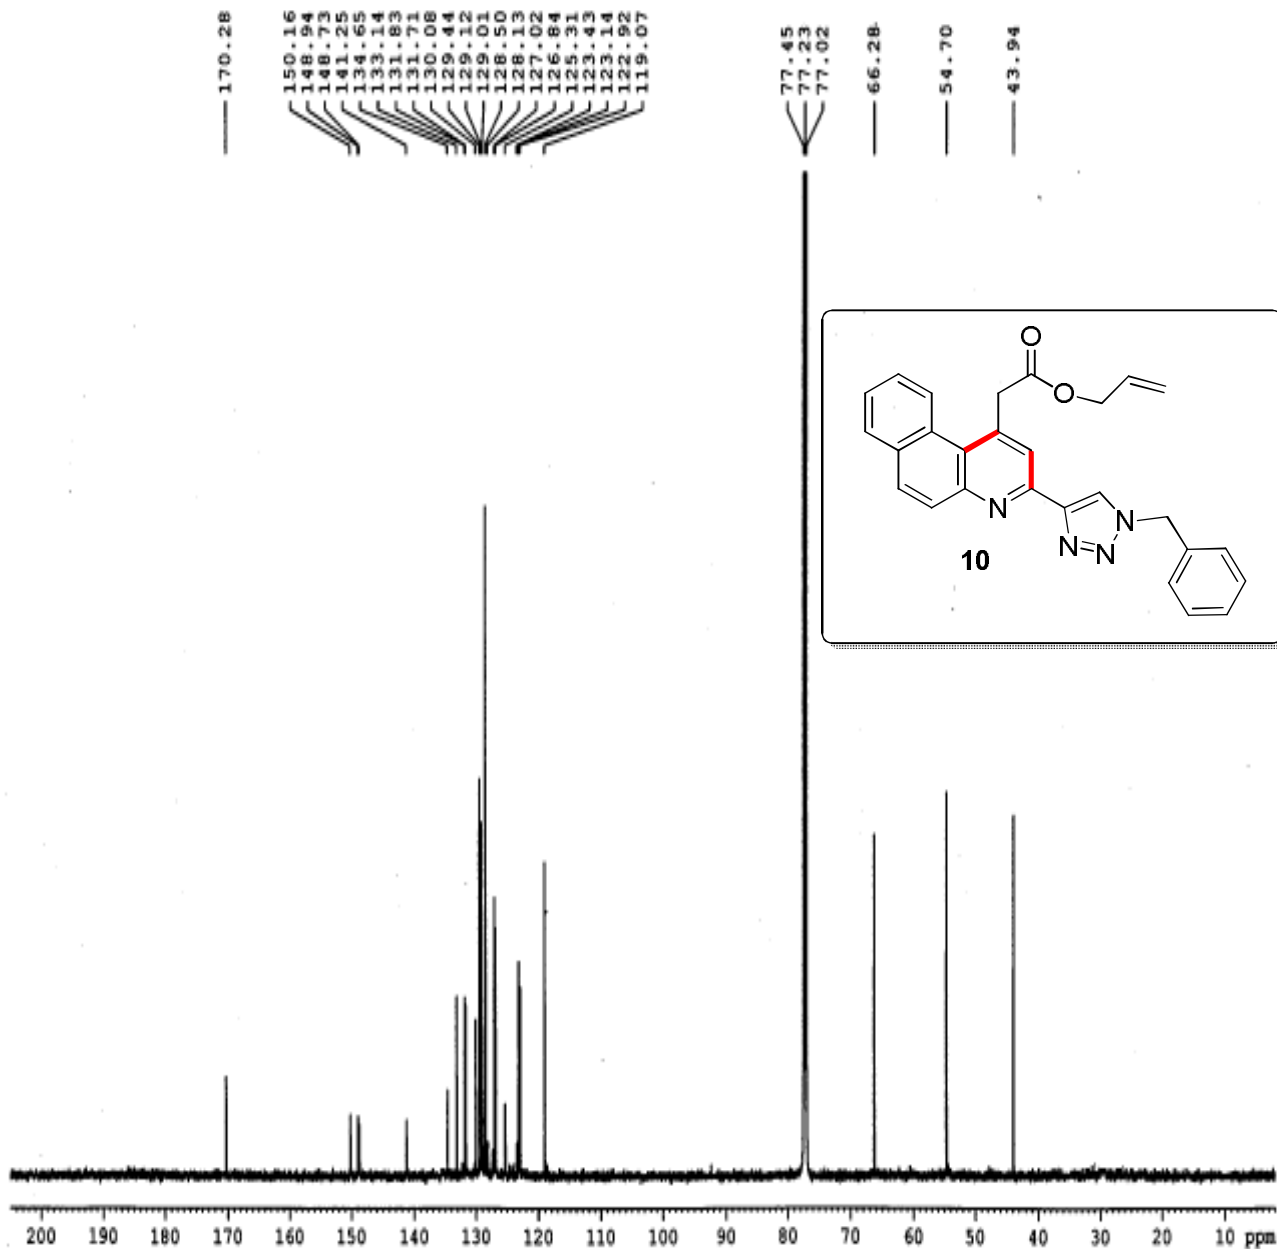

Current Data Parameters  
NAME RK-TRi-Bn-OA11-13C  
EXPNO 1  
PROCNO 1

F2 - Acquisition Parameters  
Date 20150316  
Time 17.32  
INSTRUM spect  
PROBHD 5 mm PABBO BB/  
PULPROG zgpg30  
TD 32768  
SOLVENT CDCl3  
NS 15000  
DS 2  
SMH 36057.691 Hz  
FIDRES 1.100393 Hz  
AQ 0.4543829 sec  
RG 200.18  
DM 13.867 usec  
DE 6.50 usec  
TE 297.6 K  
D1 2.00000000 sec  
D11 0.03000000 sec  
TD0 1

----- CHANNEL #1 -----  
SFO1 150.9279571 MHz  
NUC1 13C  
P1 10.50 usec  
PLW1 95.00000000 W

----- CHANNEL #2 -----  
SFO2 600.1724007 MHz  
NUC2 1H  
CPDPRG2 waltz16  
PCPD2 70.00 usec  
PLW2 21.00000000 W  
PLW12 0.61714000 W  
PLW13 0.30239999 W

F2 - Processing parameters  
SI 16384  
SF 150.9128327 MHz  
WDW EM  
SSB 0  
LB 1.00 Hz  
GB 0  
PC 1.40

HRMS spectra of compound 10

| Sample Name   | Position    | Instrument Name | User Name              |
|---------------|-------------|-----------------|------------------------|
| Inj Vol       | InjPosition | SampleType      | IRM Calibration Status |
| Data Filename | ACQ Method  | Comment         | Acquired Time          |

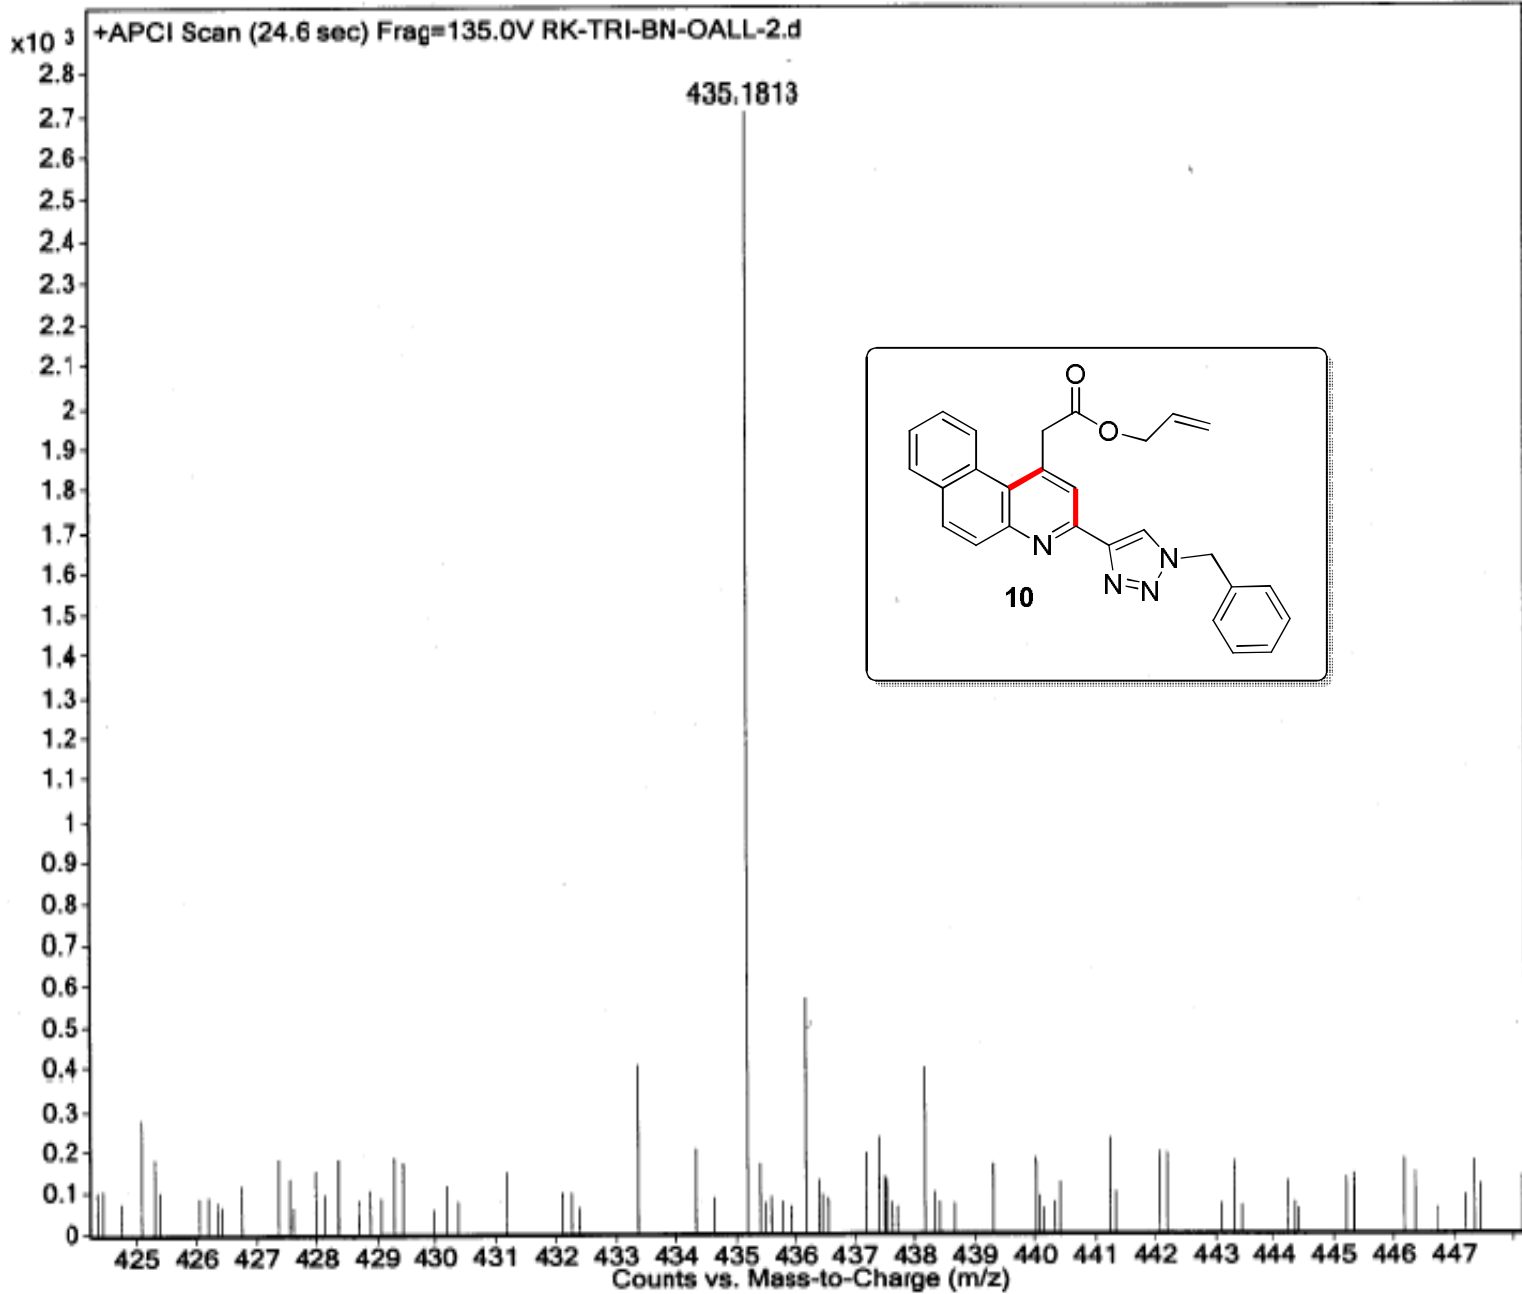

*<sup>1</sup>H NMR spectra of compound 11*

Current Data Parameters  
NAME NK-TWP-ALL-1H  
EXPNO 1  
PROCNO 1

F2 - Acquisition Parameters  
Date\_ 20141013  
Time 9.57  
INSTRUM spect  
PROBHD 5 mm PABBO BB/  
PULPROG zg30  
TD 32768  
SOLVENT CDCl3  
NS 16  
DS 2  
SWH 12019.230 Hz  
FIDRES 0.366798 Hz  
AQ 1.3631488 sec  
RG 65.24  
DM 41.600 usec  
DE 6.50 usec  
TE 299.7 K  
D1 1.00000000 sec  
TDO 1

\*\*\*\*\* CHANNEL f1 \*\*\*\*\*  
SFO1 600.1737063 MHz  
NUC1 1H  
P1 12.00 usec  
PLW1 21.00000000 W

F2 - Processing parameters  
SI 16384  
SF 600.1700147 MHz  
WDW EM  
SSB 0  
LB 0.30 Hz  
GB 0  
PC 1.00

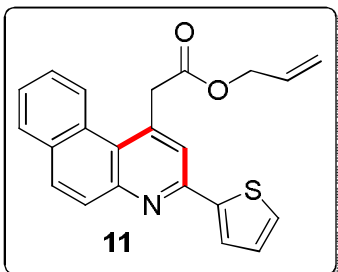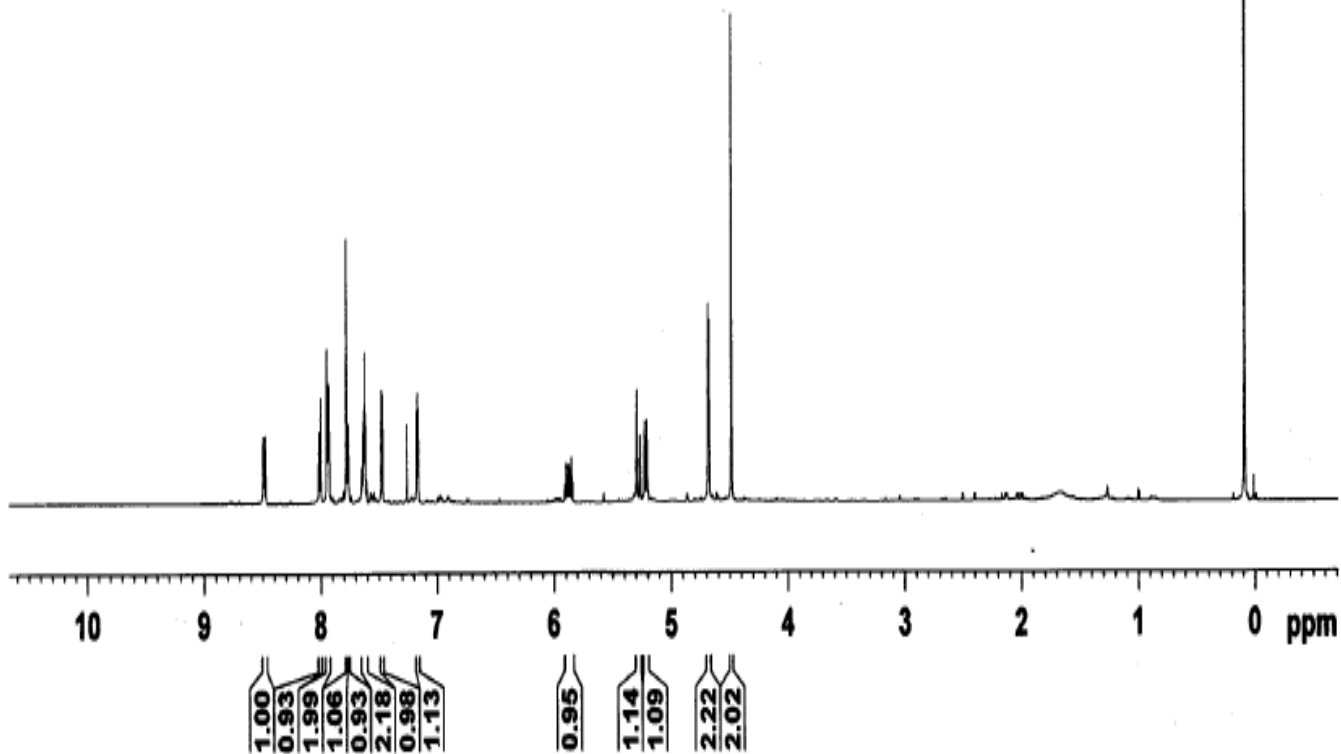

*<sup>13</sup>C NMR spectra of compound 11*

RK-THP-All-13C.1.fid  
RK-THP-All-13C

170.30  
151.07  
150.15  
144.69  
140.80  
139.78  
131.77  
131.65  
129.94  
129.46  
129.31  
128.60  
128.33  
126.85  
126.82  
126.68  
125.85  
124.90  
121.73  
119.09

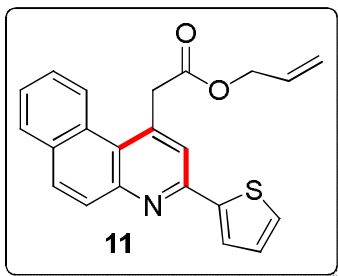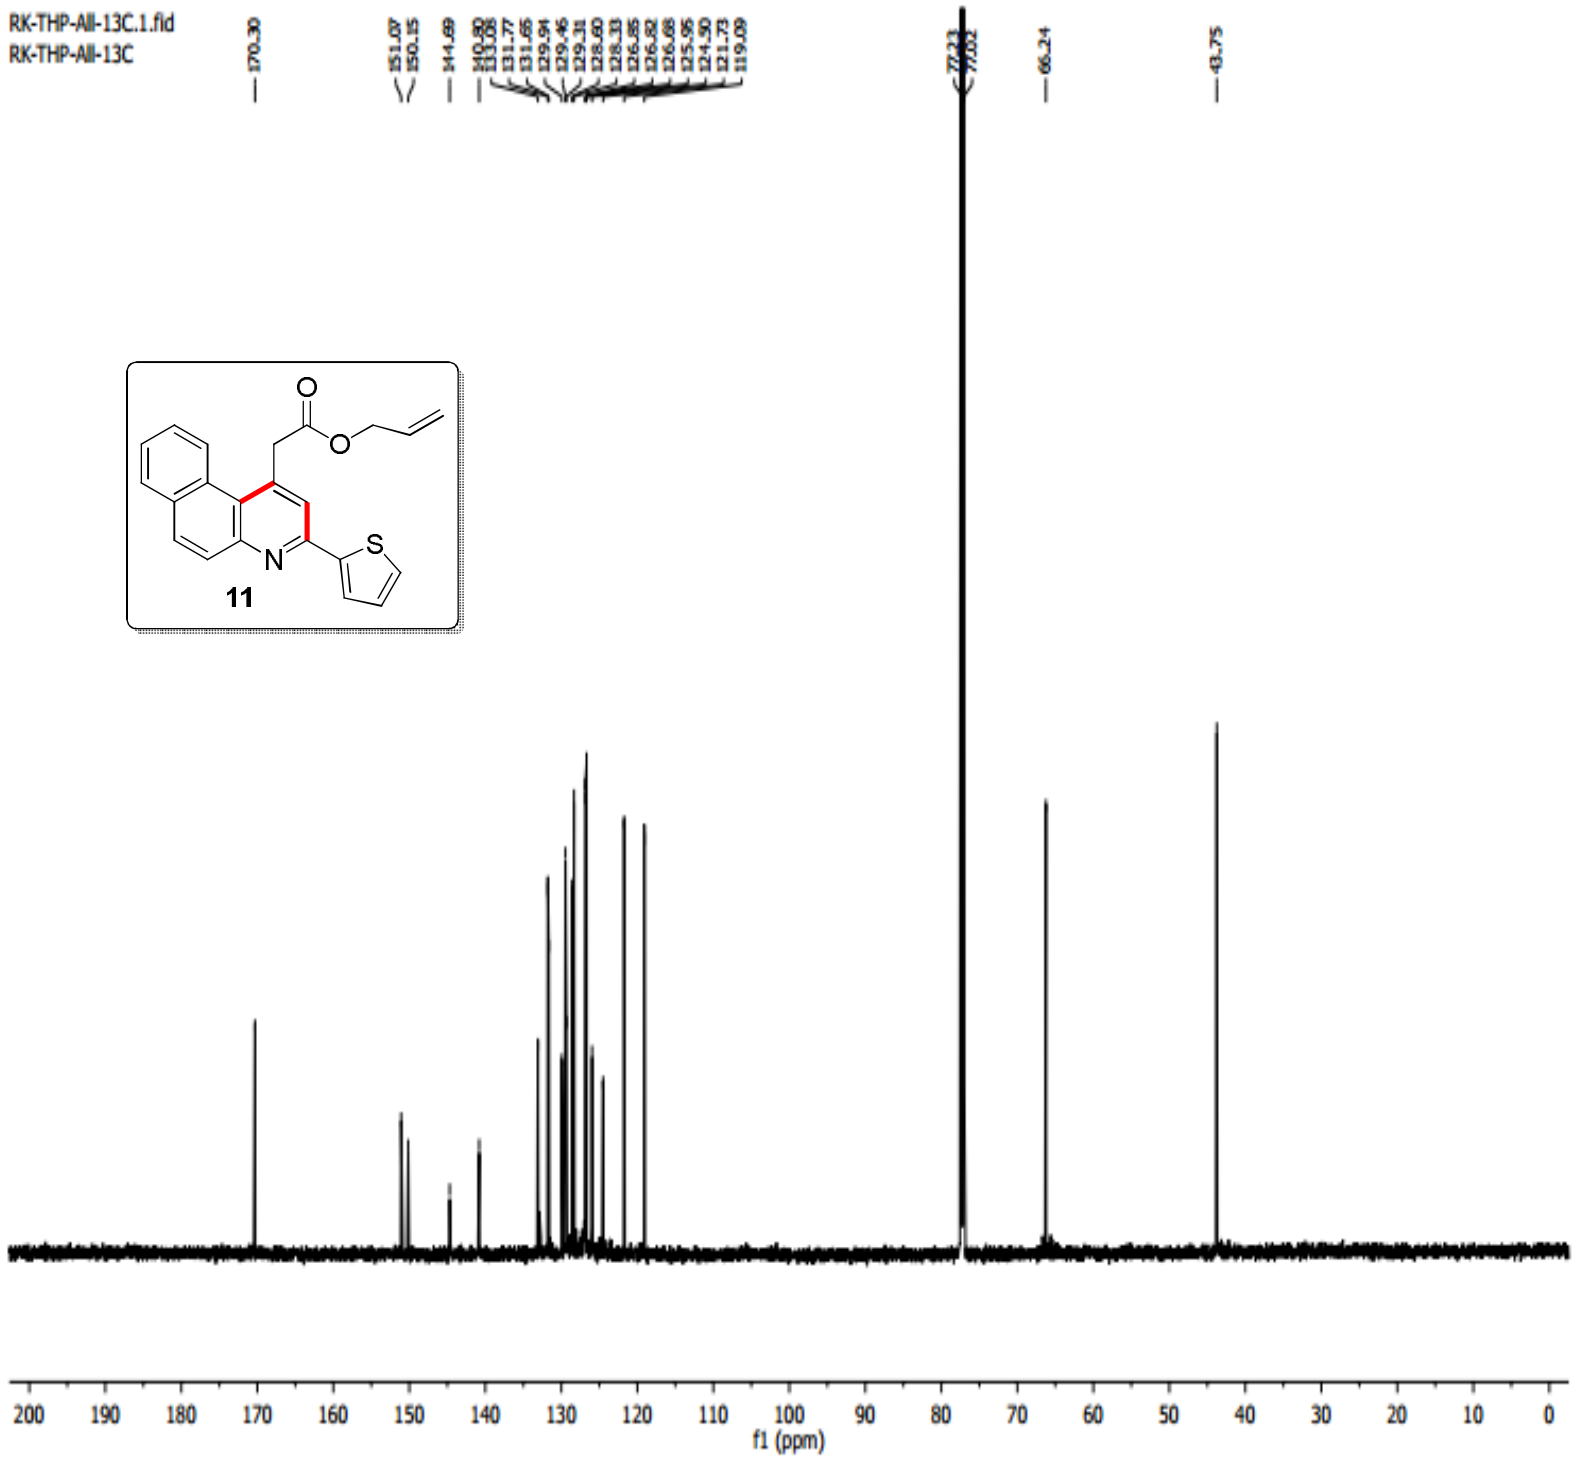

### HRMS spectra of compound 11

|               |               |             |    |                 |              |                        |                        |
|---------------|---------------|-------------|----|-----------------|--------------|------------------------|------------------------|
| Sample Name   | RK-THF-OA11   | Position    | -1 | Instrument Name | Instrument 1 | User Name              |                        |
| Inj Vol       | -10           | InjPosition |    | SampleType      | Sample       | IRM Calibration Status | Success                |
| Data Filename | RK-THF-OA11.d | ACQ Method  |    | Comment         |              | Acquired Time          | 10/15/2014 12:12:00 PM |

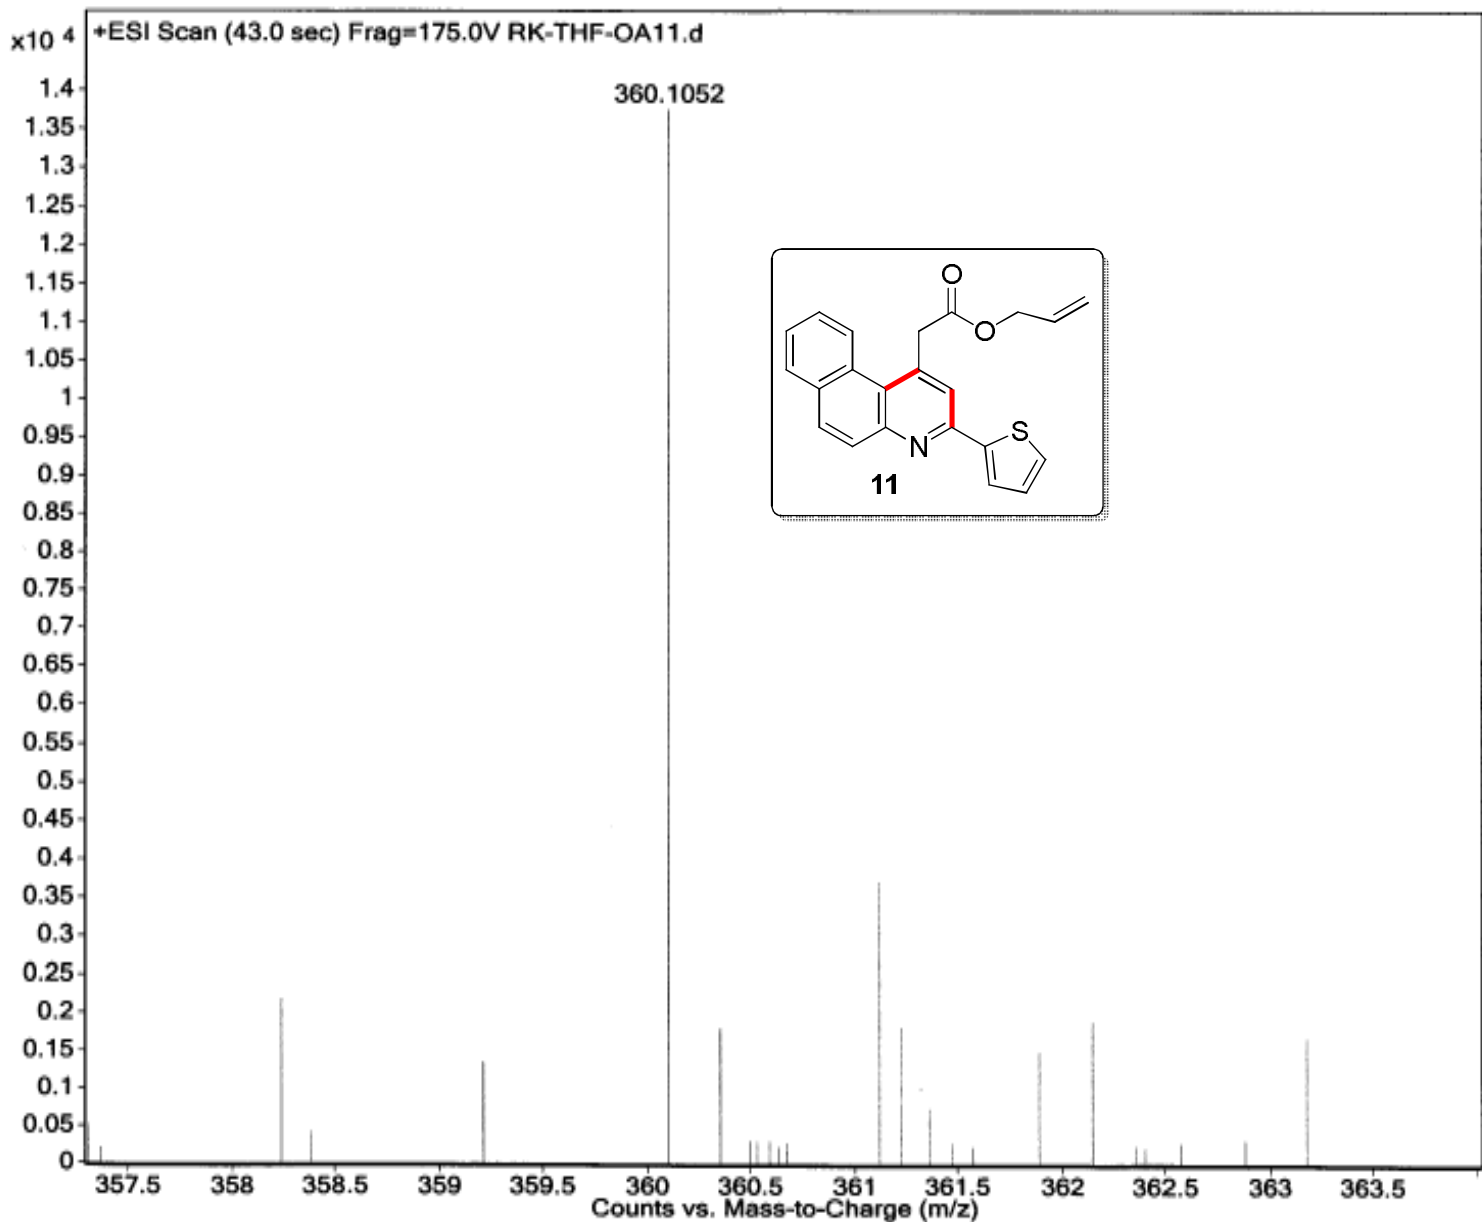

*<sup>1</sup>H NMR spectra of compound 12*

RK-4OMe-ET-PRO-1H

Sample Name:

RK-4OMe-ET-PRO-1H

Data Collected on:

IITG-NMR-mercury400

Archive directory:

Sample directory:

FidFile: RK-4OMe-ET-PRO-1H

Pulse Sequence: PROTON (s2pul)

Solvent: cdcl3

Data collected on: Nov 4 2014

Temp. 25.0 C / 298.1 K

Operator: chen

Relax. delay 1.000 sec

Pulse 45.0 degrees

Acq. time 2.561 sec

Width 6398.0 Hz

12 repetitions

OBSERVE H1, 399.8509621 MHz

DATA PROCESSING

FT size 32768

Total time 2 min 12 sec

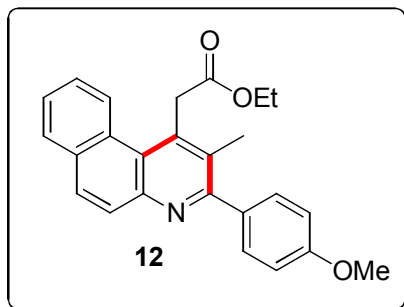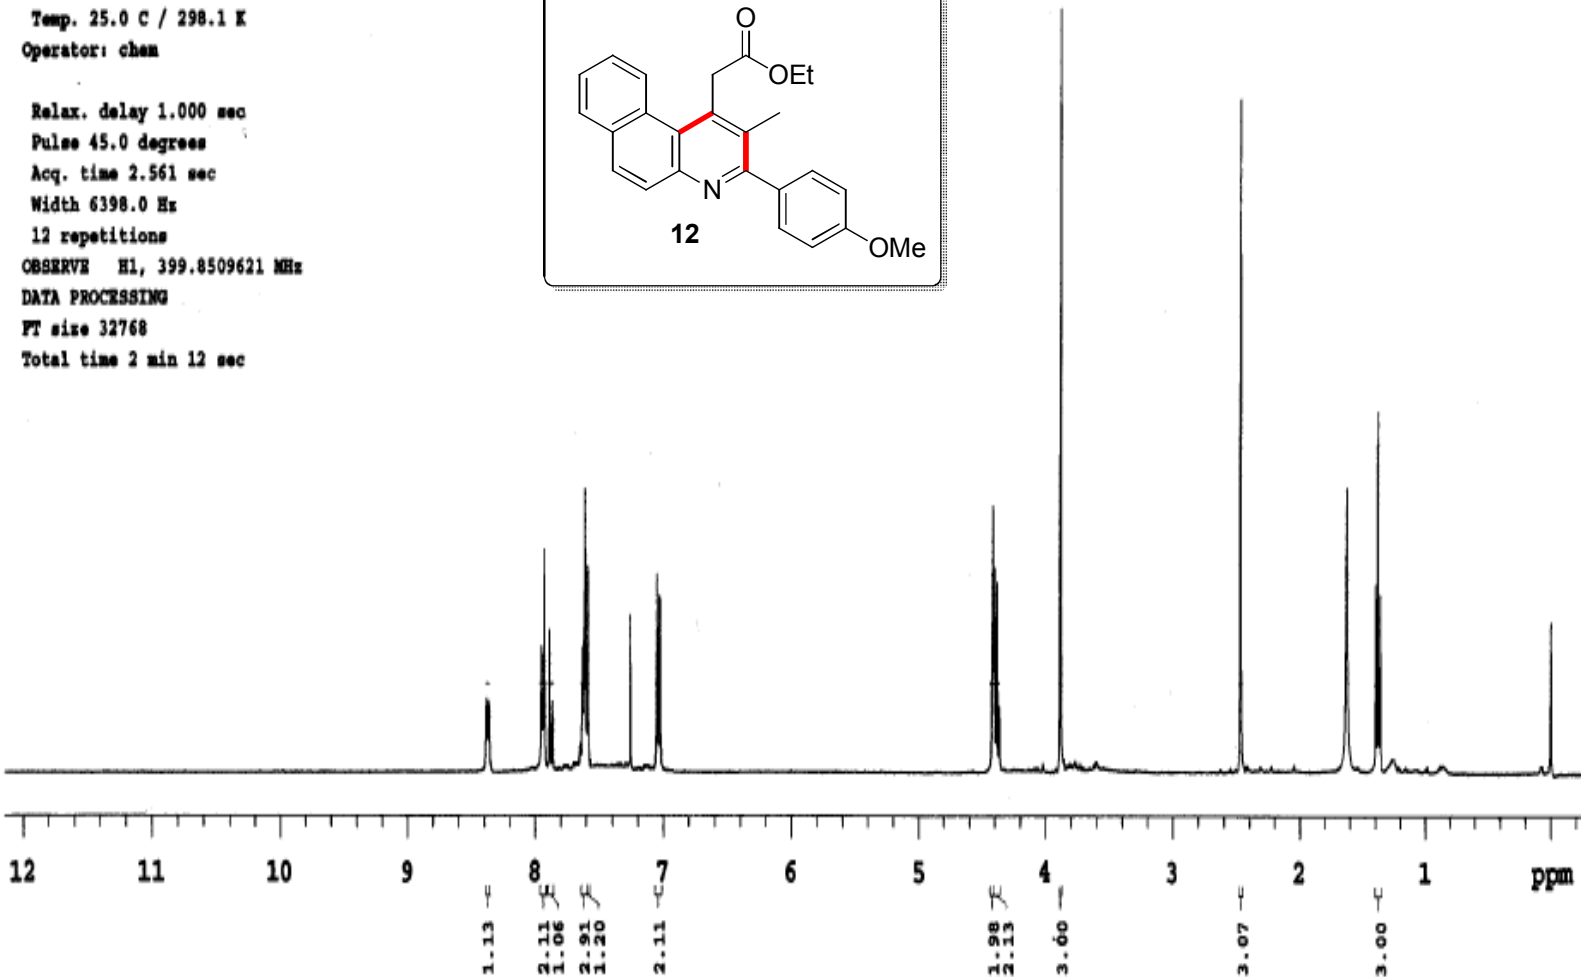

*<sup>13</sup>C NMR spectra of compound 12*

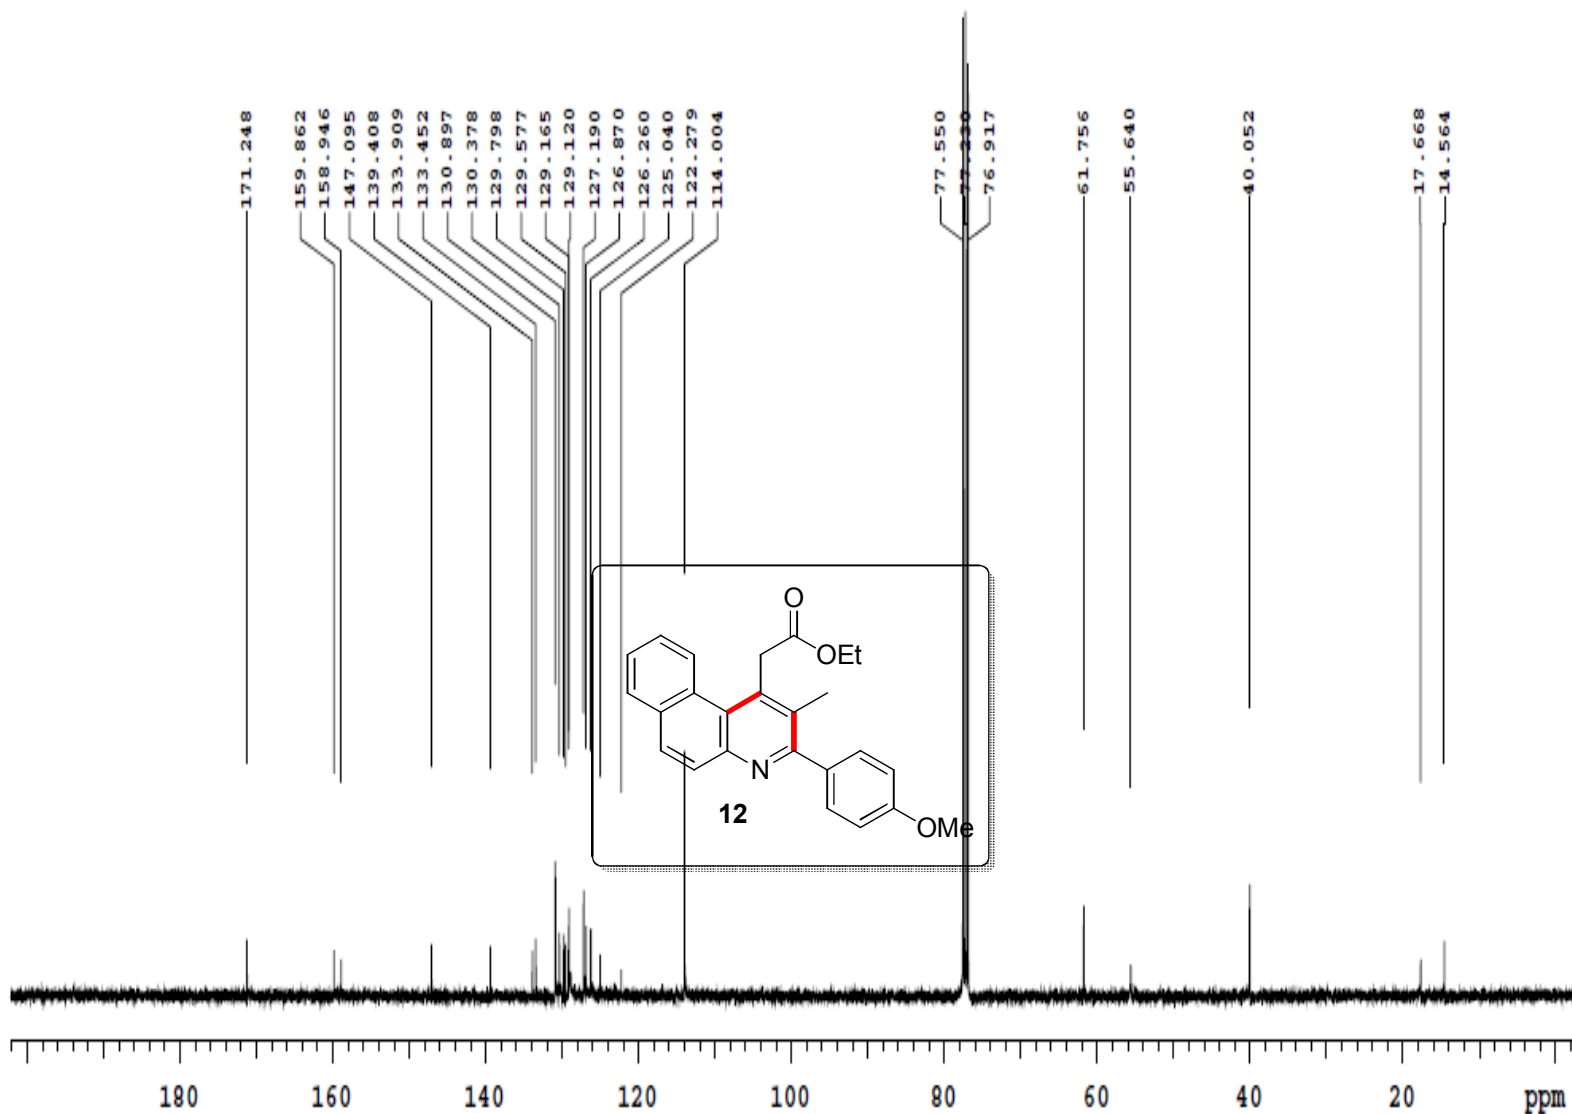

**PULSE SEQUENCE**

Relax. delay 1.000 sec  
Pulse 45.0 degrees  
Acq. time 1.304 sec  
Width 25125.6 Hz  
7100 repetitions

**OBSERVE C13, 100.5425809**

DECOUPLE H1, 399.8529994  
Power 42 dB  
continuously on  
WALTZ-16 modulated

**DATA PROCESSING**

Line broadening 0.5 Hz  
FT size 65536  
Total time 4.5 hours

**RK-4OME-ET-PRO-13C**

Solvent: cdcl3  
Temp. 25.0 C / 298.1 K  
Operator: chem  
File: RK-4OME-ET-PRO-13c  
Mercury-400 "IITG-NMR"

HRMS spectra of compound 12

| Sample Name   | Position    | Instrument Name | User Name              |
|---------------|-------------|-----------------|------------------------|
| Inj Vol       | InjPosition | SampleType      | IRM Calibration Status |
| Data Filename | ACQ Method  | Comment         | Acquired Time          |

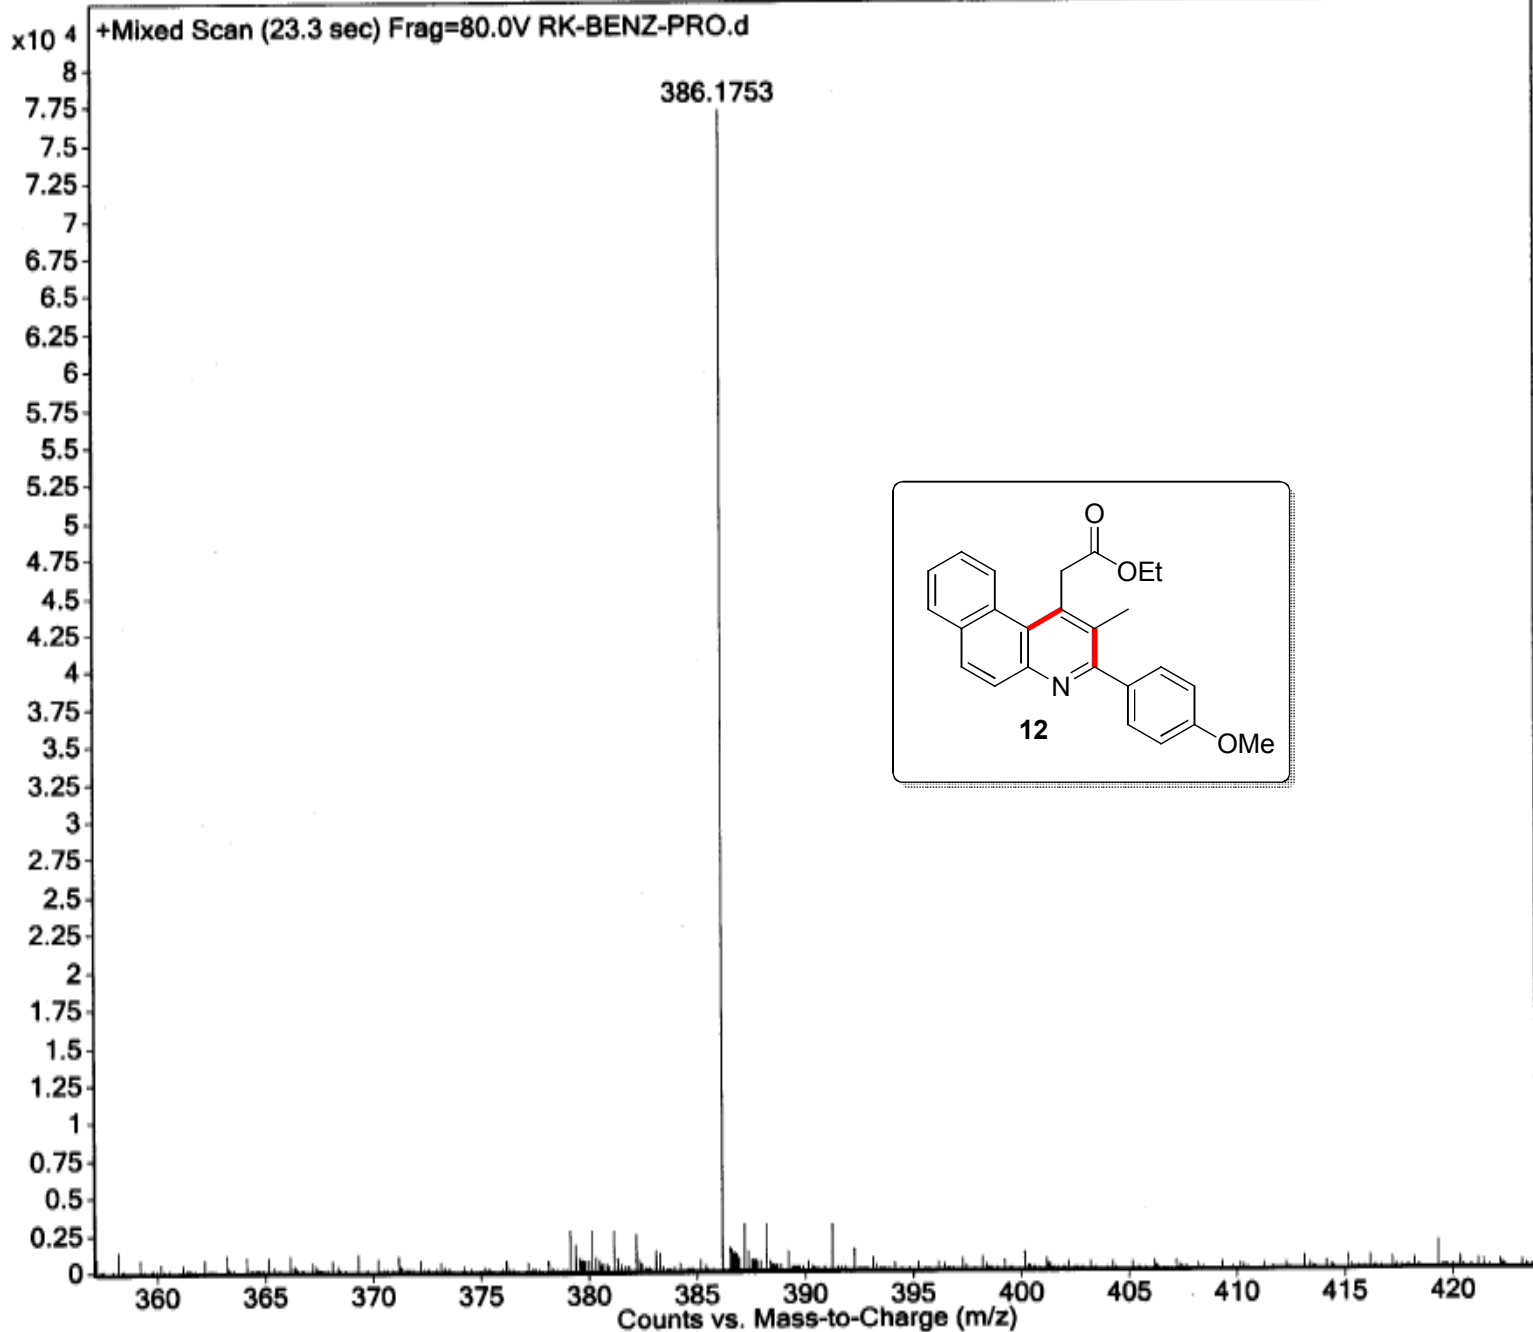



*Reaction monitoring after 10min for intermediate III of 4p*

|               |             |             |             |                 |                                   |                        |                  |
|---------------|-------------|-------------|-------------|-----------------|-----------------------------------|------------------------|------------------|
| Sample Name   | Unavailable | Position    | Unavailable | Instrument Name | Unavailable                       | User Name              | Unavailable      |
| Inj Vol       | Unavailable | InjPosition | Unavailable | SampleType      | Unavailable                       | IRM Calibration Status | Some Ions Missed |
| Data Filename | RK-2F-RXN.d | ACQ Method  |             | Comment         | Sample information is unavailable | Acquired Time          | Unavailable      |

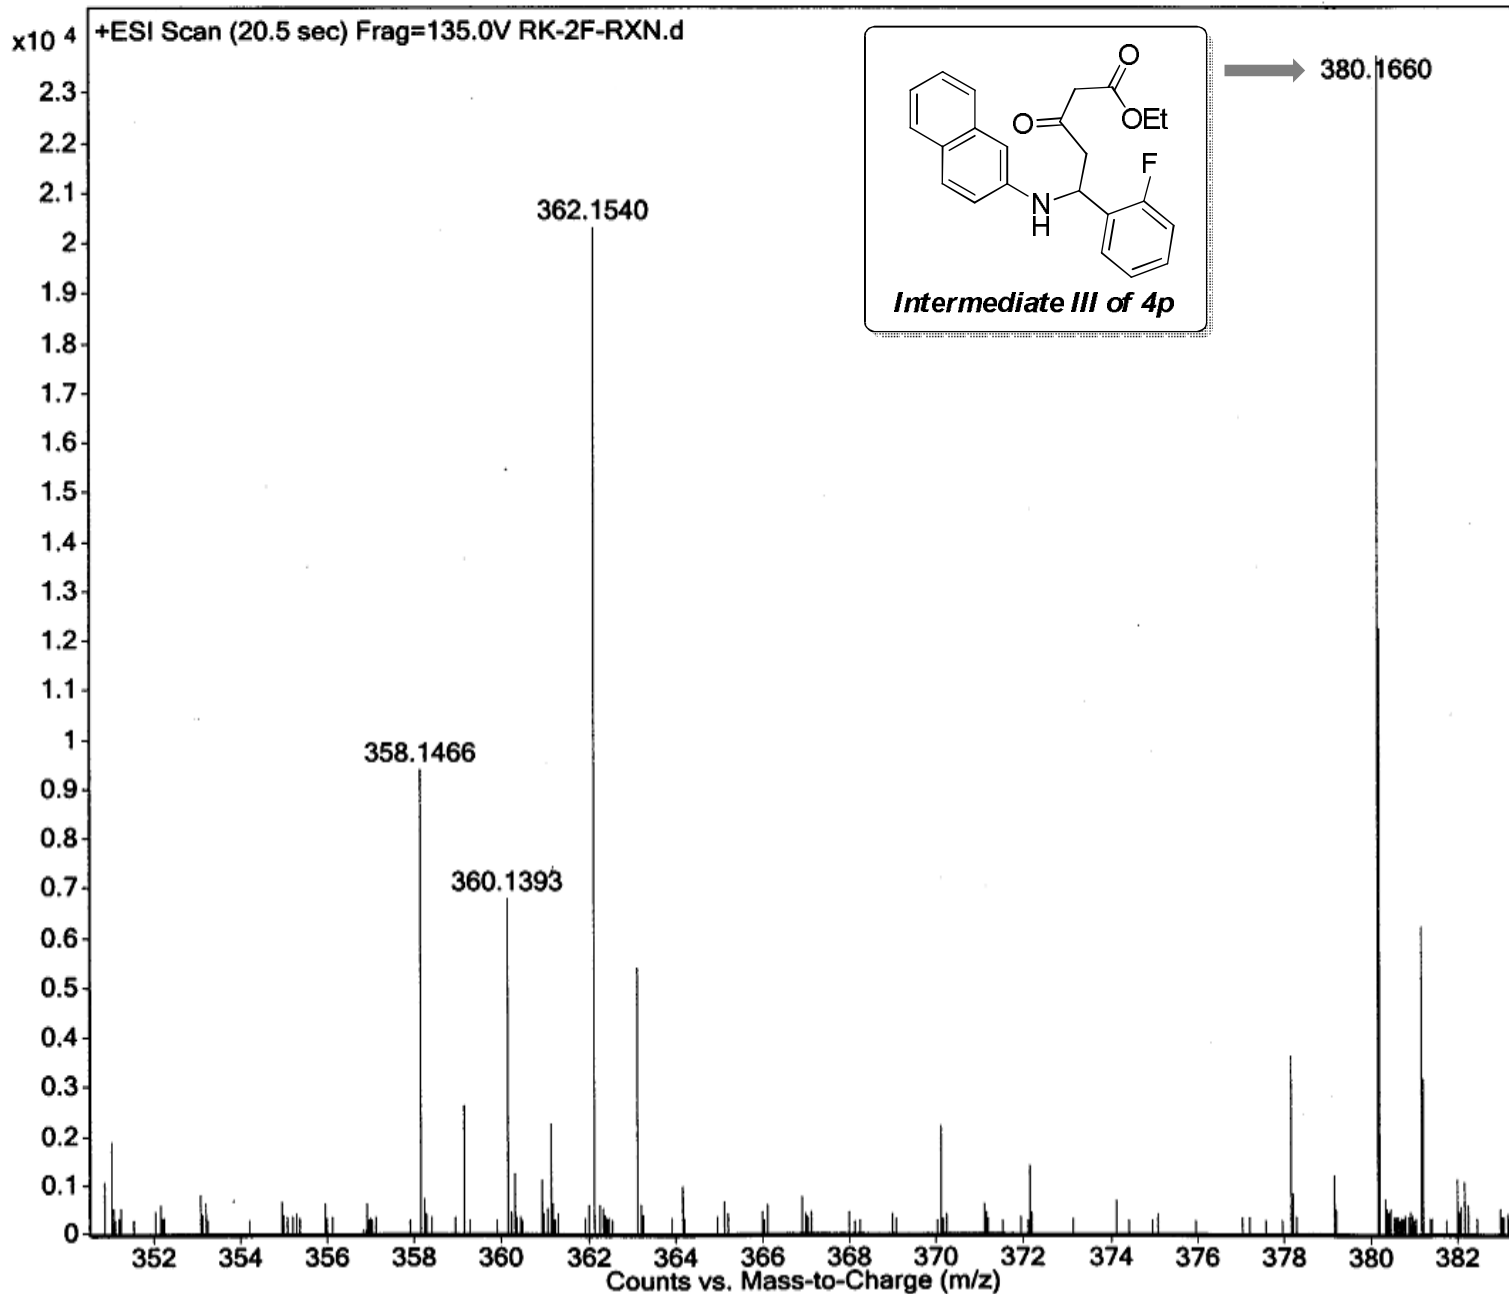

Supplement: c5ra23413a1.pdf [file c5ra23413a1.pdf]
